# Supplementary material for: LTP and memory impairment caused by extracellular Aβ and Tau oligomers is APP-dependent
Source: eLife. 2017 Jul 11;6:e26991. doi: 10.7554/eLife.26991 (PMC5529106; doi:10.7554/eLife.26991)
Supplement: Figure 2—source data 1. — DOI: http://dx.doi.org/10.7554/eLife.26991.004 [file elife-26991-fig2-data1.xlsx]

## Sheet: Fig 2B-C
Figure 2B									Figure 2C
WT				APP KO					WT		APP KO
# microscopic field	# tot cells	# cells intern	% cells with internalized spots	# microscopic field	# tot cells	# cells intern	% cells with internalized spots		#	spots/cell	#	spots/cell
1	3	1	33.3333	1	1	1	100		1	3	1	2
2	3	2	66.6667	2	1	1	100		2	3	2	3
3	6	1	16.6667	3	1	1	100		3	2	3	2
4	1	1	100	4	3	0	0		4	1	4	2
5	4	1	25	5	1	0	0		5	1	5	1
6	1	1	100	6	2	0	0		6	4	6	2
7	1	1	100	7	2	0	0		7	2	7	2
8	2	2	100	8	2	2	100		8	3	8	1
9	1	1	100	9	1	1	100		9	2	9	1
10	1	1	100	10	1	1	100		10	2	10	1
11	3	3	100	11	2	0	0		11	2	11	3
12	2	2	100	12	1	0	0		12	1	12	1
13	1	1	100	13	1	1	100		13	1	13	3
14	2	2	100	14	2	1	50		14	2	14	1
15	3	2	66.6667	15	2	1	50		15	1	15	1
16	5	3	60	16	1	1	100		16	6	16	1
17	5	5	100	17	1	1	100		17	3	17	1
18	1	1	100	18	2	2	100		18	1	18	1
19	1	1	100	19	1	1	100		19	4	19	1
20	2	1	50	20	1	0	0		20	12	20	2
21	1	1	100	21	4	2	50		21	1	21	1
22	1	1	100	22	2	1	50		22	9	22	5
23	1	1	100	23	1	1	100		23	6	23	2
24	1	1	100	24	1	0	0		24	1	24	8
25	1	1	100	25	1	1	100		25	3	25	3
26	1	1	100	26	1	0	0		26	5	26	5
27	1	1	100	27	1	1	100		27	2	27	4
28	1	1	100	28	1	1	100		28	7	28	1
29	1	1	100	29	2	2	100		29	7	29	4
30	2	2	100	30	1	1	100		30	8	30	4
31	1	1	100	31	3	3	100		31	8	31	2
32	1	1	100	32	1	1	100		32	9	32	3
33	1	1	100	33	2	2	100		33	5	33	2
34	1	1	100	34	1	1	100		34	7	34	4
35	2	2	100	35	2	1	50		35	8	35	2
36	2	2	100	36	1	1	100		36	8	36	4
37	8	8	100	37	3	2	66.6667		37	14	37	3
38	3	2	66.6667	38	8	5	62.5		38	6	38	2
39	6	6	100	39	2	2	100		39	5	39	1
40	2	2	100	40	4	2	50		40	7	40	3
41	9	9	100	41	2	2	100		41	6	41	5
42	9	9	100	42	2	2	100		42	6	42	2
43	2	2	100	43	2	2	100		43	5	43	3
44	4	4	100	44	2	0	0		44	5	44	10
45	10	10	100	45	4	4	100		45	12	45	11
46	7	7	100	46	4	4	100		46	5	46	2
		avg	90.9783	47	4	4	100		47	6	47	4
		error	3.16252	48	4	3	75		48	6	48	7
		stdev	21.4493	49	2	2	100		49	3	49	1
				50	5	5	100		50	12	50	3
				51	2	2	100		51	2	51	4
				52	2	1	50		52	7	52	1
				53	4	4	100		53	5	53	7
				54	2	2	100		54	3	54	1
						avg	73.2253		55	2	55	1
						error	5.35043		56	5	56	1
						stdev	39.3174		57	6	57	1
									58	1	58	1
									59	1	59	3
									60	2	60	5
									61	2	61	6
									62	2	62	2
									63	4	63	4
									64	1	64	4
									65	3	65	8
									66	1	66	1
									67	7	67	4
									68	4	68	1
									69	3	69	2
									70	2	70	4
									71	4	71	3
									72	5	72	1
									73	10	73	5
									74	4	74	1
									75	2	75	2
									76	2	76	1
									77	3	77	7
									78	2	78	4
									79	4	79	3
									80	3	80	6
									81	2	81	1
									82	5	82	1
									83	5	avg	2.91463
									84	2	error	0.24182
									85	4	stdev	2.18977
									86	1
									87	6
									88	4
									89	1
									90	1
									91	24
									92	14
									93	13
									94	23
									95	6
									96	8
									97	12
									98	7
									99	6
									100	6
									101	2
									102	2
									103	2
									104	2
									105	15
									106	10
									107	7
									108	10
									109	21
									110	14
									111	5
									avg	5.31532
									error	0.426398
									stdev	4.49238
