# Supplementary material for: LTP and memory impairment caused by extracellular Aβ and Tau oligomers is APP-dependent
Source: eLife. 2017 Jul 11;6:e26991. doi: 10.7554/eLife.26991 (PMC5529106; doi:10.7554/eLife.26991)
Supplement: Figure 2—source data 2. — DOI: http://dx.doi.org/10.7554/eLife.26991.005 [file elife-26991-fig2-data2.xlsx]

## Sheet: Fig 2E-F
Figure 2E									Figure 2F
WT				APP KO					WT		APP KO
# microscopic field	# tot cells	# cells intern	% cells with internalized spots	# microscopic field	# tot cells	# cells intern	% cells with internalized spots		#	spots/cell	#	spots/cell
1	1	0	0	1	1	1	100		1	1	1	1
2	1	0	0	2	1	0	0		2	1	2	1
3	1	0	0	3	2	1	50		3	2	3	1
4	2	2	100	4	1	1	100		4	4	4	1
5	1	1	100	5	2	1	50		5	1	5	1
6	1	0	0	6	1	0	0		6	6	6	2
7	1	1	100	7	1	1	100		7	4	7	2
8	3	3	100	8	3	2	66.6667		8	1	8	1
9	1	1	100	9	1	0	0		9	4	9	3
10	2	1	50	10	1	0	0		10	2	10	3
11	1	1	100	11	1	0	0		11	3	11	1
12	2	2	100	12	1	0	0		12	2	12	1
13	3	3	100	13	2	0	0		13	3	13	1
14	5	4	80	14	2	2	100		14	4	14	2
15	1	1	100	15	2	1	50		15	3	15	1
16	2	1	50	16	8	5	62.5		16	1	16	1
17	4	4	100	17	4	3	75		17	1	17	1
18	1	1	100	18	2	2	100		18	1	18	1
19	5	5	100	19	6	3	50		19	1	19	5
20	2	2	100	20	2	1	50		20	3	20	1
21	3	3	100	21	1	1	100		21	2	21	2
22	1	1	100	22	1	0	0		22	8	22	3
23	2	2	100	23	2	0	0		23	7	23	1
24	2	2	100	24	1	0	0		24	3	24	1
25	3	2	66.6667	25	3	1	33.3333		25	4	25	2
26	3	2	66.6667	26	3	1	33.3333		26	7	26	2
27	2	2	100	27	3	1	33.3333		27	8	27	1
28	5	3	60	28	4	1	25		28	4	28	1
29	13	6	46.1538	29	5	2	40		29	7	29	1
30	8	5	62.5	30	1	1	100		30	4	30	1
31	1	1	100	31	1	1	100		31	2	31	1
32	1	1	100	32	3	2	66.6667		32	3	32	1
33	1	1	100	33	3	1	33.3333		33	4	33	1
34	1	1	100	34	1	1	100		34	1	34	1
35	1	1	100	35	2	1	50		35	2	35	1
36	1	1	100	36	2	1	50		36	1	36	1
		avg	80.0552	37	4	1	25		37	3	37	2
		error	5.57825			avg	47.1396		38	2	38	1
		stdev	33.4695			error	6.18746		39	1	39	1
						stdev	37.6369		40	2	avg	1.4359
									41	5	error	0.136443
									42	2	stdev	0.852083
									43	7
									44	2
									45	2
									46	2
									47	1
									48	3
									49	3
									50	2
									51	2
									52	2
									53	1
									54	1
									55	1
									56	2
									57	1
									58	2
									59	1
									60	1
									61	3
									62	1
									63	3
									64	1
									65	4
									66	1
									avg	2.71212
									error	0.234094
									stdev	1.88733
