# Supplementary material for: LTP and memory impairment caused by extracellular Aβ and Tau oligomers is APP-dependent
Source: eLife. 2017 Jul 11;6:e26991. doi: 10.7554/eLife.26991 (PMC5529106; doi:10.7554/eLife.26991)
Supplement: Figure 2—source data 3. — DOI: http://dx.doi.org/10.7554/eLife.26991.006 [file elife-26991-fig2-data3.xlsx]

## Sheet: Fig 2G-H
Figure 2G									Figure 2H
WT				APP KO					WT				APP KO
# microscopic field	% cells with internalized spots	Mean spots per cell	Internalization Index	# microscopic field	% cells with internalized spots	Mean spots per cell	Internalization Index		# microscopic field	% cells with internalized spots	Mean spots per cell	Internalization Index	# microscopic field	% cells with internalized spots	Mean spots per cell	Internalization Index
1	33.3333	3	1	1	100	2	2		1	0	0	0	1	100	0	0
2	66.6667	2.5	1.66667	2	100	3	3		2	0	0	0	2	0	0	0
3	16.6667	1	0.166667	3	100	2	2		3	0	0	0	3	50	1	0.5
4	100	1	1	4	0	0	0		4	100	1	1	4	100	1	1
5	25	4	1	5	0	0	0		5	100	2	2	5	50	1	0.5
6	100	2	2	6	0	0	0		6	0	0	0	6	0	1	0
7	100	3	3	7	0	0	0		7	100	0	0	7	100	1	1
8	100	2	2	8	100	1.5	1.5		8	100	3.66667	3.66667	8	66.6667	1.5	1
9	100	2	2	9	100	2	2		9	100	4	4	9	0	0	0
10	100	1	1	10	100	2	2		10	50	1	0.5	10	0	0	0
11	100	1.3	1.3	11	0	0	0		11	100	4	4	11	0	0	0
12	100	4.5	4.5	12	0	0	0		12	100	2.5	2.5	12	0	0	0
13	100	1	1	13	100	1	1		13	100	3	3	13	0	0	0
14	100	8	8	14	50	1	0.5		14	80	1.5	1.2	14	100	1.5	1.5
15	66.6667	5	3.33333	15	50	1	0.5		15	100	1	1	15	50	3	1.5
16	60	3.33333	2	16	100	3	3		16	50	3	1.5	16	62.5	1.6	1
17	100	5.8	5.8	17	100	1	1		17	100	5	5	17	75	1	0.75
18	100	8	8	18	100	2	2		18	100	4	4	18	100	3	3
19	100	9	9	19	100	1	1		19	100	6	6	19	50	2	1
20	50	5	2.5	20	0	0	0		20	100	2.5	2.5	20	50	1	0.5
21	100	7	7	21	50	1	0.5		21	100	2.33333	2.33333	21	100	1	1
22	100	8	8	22	50	1	0.5		22	100	1	1	22	0	0	0
23	100	8	8	23	100	1	1		23	100	2.5	2.5	23	0	0	0
24	100	14	14	24	0	0	0		24	100	1.5	1.5	24	0	0	0
25	100	6	6	25	100	2	2		25	66.6667	3.5	2.33333	25	33.3333	2	0.666667
26	100	5	5	26	0	0	0		26	66.6667	4.5	3	26	33.3333	2	0.666667
27	100	7	7	27	100	1	1		27	100	2	2	27	33.3333	1	0.333333
28	100	6	6	28	100	5	5		28	60	2.33333	1.4	28	25	1	0.25
29	100	6	6	29	100	5	5		29	46.1538	1.5	0.692308	29	40	1	0.4
30	100	5	5	30	100	3	3		30	62.5	1.4	0.875	30	100	1	1
31	100	12	12	31	100	3.3	3.3		31	100	3	3	31	100	1	1
32	100	5	5	32	100	4	4		32	100	1	1	32	66.6667	1	0.666667
33	100	6	6	33	100	3	3		33	100	3	3	33	33.3333	1	0.333333
34	100	6	6	34	100	3	3		34	100	1	1	34	100	1	1
35	100	7.5	7.5	35	50	2	1		35	100	4	4	35	50	2	1
36	100	1	1	36	100	4	4		36	100	1	1	36	50	1	0.5
37	100	3.125	3.125	37	66.6667	3	2				avg	2.01391	37	25	1	0.25
38	66.6667	2	1.33333	38	62.5	2.8	1.75				error	0.254279				0.603153
39	100	3.33333	3.33333	39	100	2.5	2.5				stdev	1.52567				0.100459
40	100	2.5	2.5	40	50	10.5	5.25									0.611071
41	100	4	4	41	100	3	3
42	100	3.55556	3.55556	42	100	4	4
43	100	1	1	43	100	3.5	3.5
44	100	18.5	18.5	44	0	0	0
45	100	5.3	5.3	45	100	2.5	2.5
46	100	11.7143	11.7143	46	100	1.5	1.5
		avg	4.87235	47	100	4.25	4.25
		error	0.567679	48	75	4.33333	3.25
		stdev	3.85018	49	100	2.5	2.5
				50	100	3	3
				51	100	1.5	1.5
				52	50	1	0.5
				53	100	5	5
				54	100	1	1
							1.94074
							0.210446
							1.54645
