# Supplementary material for: LTP and memory impairment caused by extracellular Aβ and Tau oligomers is APP-dependent
Source: eLife. 2017 Jul 11;6:e26991. doi: 10.7554/eLife.26991 (PMC5529106; doi:10.7554/eLife.26991)
Supplement: Figure 2—source data 4. — DOI: http://dx.doi.org/10.7554/eLife.26991.007 [file elife-26991-fig2-data4.xlsx]

## Sheet: Fig 2I-J
Figure 2I					Figure 2J
WT		APP KO			WT		APP KO
# cells	# spots on membrane	# cells	# spots on membrane		# cells	# spots on membrane	# cells	# spots on membrane
1	9	1	7		1	4	1	19
2	10	2	11		2	3	2	4
3	1	3	6		3	5	3	4
4	14	4	5		4	10	4	7
5	11	5	7		5	6	5	19
6	3	6	8		6	4	6	20
7	8	7	7		7	4	7	2
8	3	8	6		8	5	8	2
9	7	9	9		9	12	9	4
10	5	10	7		10	2	10	5
11	4	11	3		11	4	11	5
12	2	12	6		12	4	12	2
13	11	13	14		13	1	13	6
14	6	14	8		14	2	14	2
15	6	15	7		15	4	15	4
16	4	16	11		16	5	16	3
17	7	17	11		17	6	17	1
18	10	18	6		18	3	18	1
19	9	19	14		19	2	19	3
20	9	20	11		20	2	20	5
21	8	21	8		21	5	21	6
22	20	22	15		22	1	22	3
23	12	23	16		23	5	23	1
24	18	24	14		24	2	24	1
25	20	25	14		25	12	25	1
26	20	26	11		26	7	26	1
27	18	27	11		27	6	27	1
28	16	28	11		28	2	28	2
29	20	29	10		29	1	29	2
30	17	30	6		30	2	30	3
31	6	31	9		31	4	31	1
32	13	32	21		32	7	32	13
33	16	33	26		33	3	33	4
34	6	34	20		34	5	34	1
35	10	35	7		35	1	35	2
36	14	36	8		36	4	36	4
37	16	37	3		37	4	37	8
38	9	38	5		38	5	38	5
39	4	39	7		39	5	39	4
40	6	40	1		40	2	40	6
41	3	41	2		41	4	41	1
42	9	42	5		42	8	42	1
43	6	43	2		43	3	43	1
44	3	44	2		44	4	44	2
45	7	45	1		avg	4.31818	45	3
46	1	46	4		error	0.388488	46	4
47	4	47	1		stdev	2.57693	47	1
48	1	48	2				48	1
49	2	49	5				49	2
50	1	50	1				50	1
51	8	51	4				51	2
52	10	52	1				avg	4.03922
53	2	53	2				error	0.6287
54	3	54	2				stdev	4.48981
55	2	55	3
56	1	56	1
57	1	57	1
58	1	58	2
59	1	59	7
60	3	60	1
61	1	61	3
62	4	62	4
63	4	63	2
64	7	64	2
65	5	65	4
66	3	66	5
67	2	67	2
68	3	68	8
69	3	69	1
70	6	70	5
71	4	71	4
72	6	72	1
73	3	73	2
74	2	74	3
75	3	75	2
76	10	avg	6.45333
77	7	error	0.599187
78	2	stdev	5.18911
79	15
80	9
81	3
82	5
83	2
84	5
85	5
86	4
87	6
88	5
89	7
90	8
91	8
92	6
93	12
94	3
95	3
96	6
97	6
avg	6.90722
error	0.515041
stdev	5.07256
