# Supplementary material for: LTP and memory impairment caused by extracellular Aβ and Tau oligomers is APP-dependent
Source: eLife. 2017 Jul 11;6:e26991. doi: 10.7554/eLife.26991 (PMC5529106; doi:10.7554/eLife.26991)
Supplement: Figure 3—source data 1. — DOI: http://dx.doi.org/10.7554/eLife.26991.009 [file elife-26991-fig3-data1.xlsx]

## Sheet: Fig 3A-C
Figure 3A
	WT vehicle				WT Abeta				APP KO vehicle				APP KO Abeta
#	Baseline	24 h		#	Baseline	24 h		#	Baseline	24 h		#	Baseline	24 h
1	6.05049	46.2685		1	3.82605	8.36392		1	0.415228	39.2983		1	1.83886	25.7441
2	12.1603	35.9471		2	1.27535	11.7451		2	2.96326	48.3116		2	4.15228	54.3947
3	2.75831	48.8296		3	6.5547	38.9723		3	3	25.6133		3	7.83001	48.0444
4	6.94027	25.8481		4	8.42295	14.8741		4	5.14667	34.0133		4	16.1346	56.0853
5	4.47856	36.8517		5	7.05891	20.3759		5	4.64	65.44		5	7.32	28.4667
6	3.67775	45.3046		6	6.46572	25.3587		6	1.81333	26.9013		6	6.8	55.1333
7	3.32182	53.4756		7	8.24524	21.0283		7	4.55467	27.6267		7	4.92	35.2267
8	0	40.3467		8	0.711819	27.316		8	5.88	35.2133		8	0.573333	20.608
9	1.22222	31.88		9	0	10.84		9	1.62133	23.2133		9	0.64	22.4173
10	0	22.5467		10	0	11.4667		10	4.56707	57.4845		10	0.346667	21.608
11	5.6	59.7152		11	0	3.64		11	5.76573	47.5389		11	0.32	45.5067
avg	4.20089	40.6376		avg	3.86916	17.6346		avg	3.66975	39.1504		avg	4.62507	37.5668
error	1.06005	3.44897		error	1.06867	3.06895		error	0.549141	4.20342		error	1.45209	4.37698
stdev	3.51578	11.4389		stdev	3.54437	10.1786		stdev	1.8213	13.9412		stdev	4.81604	14.5168
Figure 3B
	WT vehicle				WT Abeta				APP KO vehicle				APP KO Abeta
#	Pre-Cued	Cued		#	Pre-Cued	Cued		#	Pre-Cued	Cued		#	Pre-Cued	Cued
1	8.91795	87.4606		1	14.5599	92.6174		1	23.9025	115.114		1	9.28191	65.7724
2	26.2004	80.2065		2	14.3173	81.6977		2	7.27996	45.1459		2	29.5381	73.7602
3	53.4246	106.95		3	11.9817	50.227		3	8.60455	98.8364		3	13.5286	110.918
4	32.1913	81.4704		4	14.7117	71.334		4	3.17727	56.8909		4	33.0025	103.891
5	18.5413	53.5131		5	20.0958	85.9951		5	5.79545	94.4591		5	12.2727	17.5636
6	13.8778	48.407		6	21.0438	62.9417		6	19.8682	28.2545		6	8.4	91.2818
7	5.83917	63.2956		7	15.925	86.0709		7	6.06818	28.2545		7	3.28636	53.25
8	2.38636	3.70909		8	22.9358	61.7284		8	2.91818	36.0136		8	8.97273	54.9955
9	6.24545	35.9727		9	0.422727	38.4545		9	3.53182	23.7409		9	11.1273	52.3364
10	1.22727	32.1136		10	0.3	25.6364		10	18.6545	58.7909		10	1.06364	64.8682
11	0.463636	61.0724		11	0.286364	28.2545		11	28.05	48.6194		11	2.72727	73.8545
avg	15.3923	59.4701		avg	12.4164	62.2689		avg	11.6228	57.6473		avg	12.1092	69.3174
error	4.92415	8.80946		error	2.5367	7.21233		error	2.76902	9.50565		error	3.10829	7.92646
stdev	16.3316	29.2177		stdev	8.41328	23.9206		stdev	9.18379	31.5267		stdev	10.309	26.2891
Figure 3C
	WT vehicle				WT Abeta				APP KO vehicle				APP KO Abeta
#	Visible	Motor	Vocal	#	Visible	Motor	Vocal	#	Visible	Motor	Vocal	#	Visible	Motor	Vocal
1	0.2	0.3	0.3	1	0.2	0.3	0.4	1	0.1	0.4	0.4	1	0.2	0.4	0.4
2	0.1	0.2	0.3	2	0.1	0.2	0.3	2	0.1	0.2	0.2	2	0.2	0.3	0.4
3	0.1	0.2	0.3	3	0.1	0.2	0.4	3	0.1	0.3	0.3	3	0.2	0.2	0.2
4	0.1	0.2	0.2	4	0.1	0.2	0.3	4	0.2	0.2	0.3	4	0.1	0.2	0.3
5	0.1	0.2	0.2	5	0.1	0.2	0.4	5	0.1	0.2	0.3	5	0.1	0.2	0.2
6	0.1	0.2	0.3	6	0.1	0.1	0.3	6	0.1	0.3	0.3	6	0.1	0.2	0.3
7	0.1	0.2	0.2	7	0.1	0.2	0.2	7	0.1	0.3	0.3	7	0.1	0.1	0.2
8	0.1	0.2	0.2	8	0.2	0.4	0.3	8	0.1	0.2	0.2	8	0.1	0.2	0.3
9	0.1	0.2	0.3	9	0.2	0.4	0.3	9	0.1	0.2	0.3	9	0.2	0.3	0.3
10	0.2	0.2	0.3	10	0.1	0.2	0.2	10	0.1	0.2	0.3	10	0.1	0.4	0.3
11	0.1	0.4	0.4	11	0.2	0.2	0.2	11	0.1	0.2	0.2	11	0.1	0.4	0.4
avg	0.118182	0.227273	0.272727	avg	0.136364	0.236364	0.3	avg	0.109091	0.245455	0.281818	avg	0.136364	0.263636	0.3
error	0.040452	0.064667	0.064667	error	0.0504525	0.0924416	0.0774597	error	0.0301511	0.0687552	0.0603023	error	0.0504525	0.102691	0.0774597
stdev	0.0121967	0.0194978	0.0194978	stdev	0.015212	0.0278722	0.023355	stdev	0.00909091	0.0207305	0.0181818	stdev	0.015212	0.0309625	0.023355
