# Supplementary material for: LTP and memory impairment caused by extracellular Aβ and Tau oligomers is APP-dependent
Source: eLife. 2017 Jul 11;6:e26991. doi: 10.7554/eLife.26991 (PMC5529106; doi:10.7554/eLife.26991)
Supplement: Figure 3—source data 2. — DOI: http://dx.doi.org/10.7554/eLife.26991.010 [file elife-26991-fig3-data2.xlsx]

## Sheet: Fig 3D-F
Figure 3D
	WT vehicle											APP KO vehicle
	DAY 1					DAY 2						DAY 1					DAY 2
#	Block 1	Block 2	Block 3	Block 4	Block 5	Block 6	Block 7	Block 8	Block 9	Block 10	#	Block 1	Block 2	Block 3	Block 4	Block 5	Block 6	Block 7	Block 8	Block 9	Block 10
1	3.33333	4.33333	2.66667	2.33333	1.66667	1	1	0.666667	1	0.666667	1	4.33333	5.33333	0.666667	3.66667	2.33333	0.666667	0	0.333333	1.66667	0
2	4.33333	2.66667	3.66667	1.66667	0.666667	4	1	1	0.666667	1.66667	2	5.33333	4	3.66667	2.66667	1.33333	2.33333	2.33333	1.66667	1.33333	1.33333
3	3.66667	2	4.33333	1.66667	2.66667	3.33333	1.66667	1	2	0.333333	3	4.66667	3.33333	4	3.33333	3.33333	2.33333	2	3.66667	1.33333	2.33333
4	4.33333	1.66667	2	1	1	1.66667	0.333333	2.33333	0	0	4	5	4	4	4.66667	3.66667	4.33333	3.33333	1.66667	3	2.33333
5	2.66667	5.33333	1.66667	4.33333	2.66667	3	2.66667	3.66667	5.33333	3.33333	5	5.33333	6	4.66667	2.66667	4	3.33333	4.33333	2.33333	2.33333	0
6	4.66667	4.33333	2.66667	3	2.33333	3.66667	2.66667	0.666667	0	0.333333	6	2	1.33333	2	1.33333	1.33333	3.33333	2	2	1.33333	1.66667
7	4.33333	4.66667	1.66667	0.333333	2.66667	0.666667	2	2	0.333333	0	7	4	4	3.33333	2.66667	1.66667	2.66667	4.33333	2	3	0.333333
8	4	3	2.66667	2.66667	3.33333	1.66667	1.33333	0.333333	1	0.666667	8	4.33333	4	3.33333	3	2.66667	1.66667	2.66667	1.33333	1.33333	3
9	2	1.66667	2.33333	2.33333	3.33333	1	0.666667	0.333333	1.66667	0.666667	9	1	3	4	2.66667	4	1.66667	2.33333	2	0.333333	1.33333
10	4	3.33333	4	2.33333	4	1.66667	4	3	1.66667	1	10	4	2	3.33333	1.33333	0.666667	4.33333	1.66667	1.66667	0	0
11	5	3	3.66667	2.66667	0.666667	3.66667	2.66667	1.66667	1	0.333333	11	3.66667	1.33333	1.33333	1.33333	1.33333	1.66667	0	2.66667	1.33333	0
avg	3.84848	3.27273	2.84848	2.21212	2.27273	2.30303	1.81818	1.51515	1.33333	0.818182	avg	3.9697	3.48485	3.12121	2.66667	2.39394	2.57576	2.27273	1.93939	1.54545	1.12121
error	0.267286	0.378242	0.281997	0.318686	0.341767	0.374583	0.331399	0.33744	0.447214	0.289072	error	0.408136	0.452521	0.376783	0.314627	0.364645	0.351306	0.433026	0.249517	0.285235	0.337168
stdev	0.886487	1.25449	0.935279	1.05696	1.13351	1.24235	1.09913	1.11916	1.48324	0.958745	stdev	1.35363	1.50084	1.24965	1.0435	1.20939	1.16515	1.43618	0.827556	0.946018	1.11826
	WT Abeta											APP KO Abeta
	DAY 1					DAY 2						DAY 1					DAY 2
#	Block 1	Block 2	Block 3	Block 4	Block 5	Block 6	Block 7	Block 8	Block 9	Block 10	#	Block 1	Block 2	Block 3	Block 4	Block 5	Block 6	Block 7	Block 8	Block 9	Block 10
1	5.66667	1.66667	1.66667	1	1.66667	2.66667	3.33333	2	1.66667	2	1	4	4.66667	3.66667	3	3	1.33333	1.66667	1	3.66667	0
2	5	4.66667	3.66667	3.66667	2.33333	3.66667	0.333333	2.66667	1.66667	2.66667	2	2	2.66667	2.66667	2.66667	0.666667	2.66667	1.33333	2.33333	1	1
3	3.66667	4.66667	3.33333	2.33333	3.66667	6.33333	4.33333	5	3.33333	2.66667	3	4	3.33333	3	2	1	2	2.33333	1	0	2
4	8	5.33333	8.33333	5	7	8	8	4	7	4.66667	4	5.33333	2.66667	2.66667	5.33333	2.66667	0.666667	0.666667	1	0.666667	1.33333
5	2.33333	3.66667	4.33333	1.33333	0.333333	1	0.666667	1.66667	2	1.66667	5	4.66667	2.66667	3.33333	3.66667	3.33333	5	3.66667	3.66667	3.33333	2.33333
6	2.66667	1.66667	3	2.66667	1.66667	1.66667	2.66667	2.66667	1.66667	1.66667	6	3.66667	4	2	2.66667	3.66667	2	2.33333	1.66667	2.33333	1.33333
7	5	2.66667	2.66667	3	5	3	3	1.33333	2	3.33333	7	2	4	4	3.66667	4	2.33333	2.33333	1.66667	1.33333	2
8	4.66667	5	5.33333	4.33333	0.666667	2	3.66667	2.33333	3	1.66667	8	5.33333	3	2.33333	2	2	1.66667	3	2.66667	1.33333	0
9	3	3.33333	1	2.66667	4	2	4	2.66667	3.66667	3.66667	9	3.33333	0.666667	4.33333	2.66667	2.66667	4	3	1.33333	1	1
10	3.33333	4	4	4	3.66667	4	3.66667	2.66667	2.66667	2.66667	10	1.66667	3.33333	2.33333	0	1.66667	3.66667	2.33333	1.33333	1.33333	1
11	3.66667	4	3.33333	4	2.33333	3	2.66667	3	3	3.33333	11	5.66667	2.33333	2.66667	0.333333	3.33333	1.66667	0.666667	0	1	1.33333
avg	4.27273	3.69697	3.69697	3.09091	2.93939	3.39394	3.30303	2.72727	2.87879	2.72727	avg	3.78788	3.0303	3	2.54545	2.54545	2.45455	2.12121	1.60606	1.54545	1.21212
error	0.491993	0.379938	0.586816	0.376295	0.594279	0.630565	0.60712	0.310809	0.465524	0.290656	error	0.429406	0.319262	0.224733	0.452318	0.328057	0.387358	0.288755	0.297526	0.337168	0.225956
stdev	1.63176	1.26011	1.94625	1.24803	1.971	2.09135	2.01359	1.03084	1.54397	0.963998	stdev	1.42418	1.05887	0.745356	1.50017	1.08804	1.28472	0.957691	0.986781	1.11826	0.749411
Figure 3E
	WT vehicle						WT Abeta						APP KO vehicle						APP KO Abeta
					avg						avg						avg						avg
#	1st session	2nd session	3rd session	4th session	bar graph	#	1st session	2nd session	3rd session	4th session	bar graph	#	1st session	2nd session	3rd session	4th session	bar graph	#	1st session	2nd session	3rd session	4th session	bar graph
1	18.7148	21.5935	25.5208	25.1976	22.7567	1	19.0222	20.0144	24.8286	18.3459	20.5528	1	17.6556	16.8336	19.994	21.5051	18.9971	1	19.073	18.5183	21.7603	24.5536	20.9763
2	19.3673	21.8747	26.7233	15.6505	20.9039	2	15.824	14.2651	23.2592	19.226	18.1436	2	18.2039	17.7732	19.0559	15.9829	17.754	2	18.231	16.1193	16.5383	15.859	16.6869
3	19.6349	24.5531	23.6494	16.7158	21.1383	3	21.3395	20.9749	20.4252	22.5916	21.3328	3	44	25.3333	24.5	26.3333	30.0417	3	16.1877	15.9774	17.4677	18.2103	16.9608
4	17.532	16.5467	18.7334	16.4879	17.325	4	18.1957	19.1728	15.3344	17.1382	17.4603	4	14.6667	17.3333	26.5	36	23.625	4	14.8365	15.8411	16.1566	17.6215	16.1139
5	13.6687	21.1499	18.5976	16.6877	17.526	5	21.8454	18.9922	13.669	16.0472	17.6384	5	22.6667	24.6667	17	19	20.8333	5	22	21	20.6667	23.6667	21.8333
6	16.6068	18.4575	20.4901	24.9456	20.125	6	19.7242	18.8839	20.5106	23.8782	20.7492	6	8.66667	27.3333	14	7.33333	14.3333	6	23	27.3333	21	19.6667	22.75
7	20.4029	19.7978	20.3398	20.352	20.2231	7	20.7204	21.9416	20.9486	23.8911	21.8754	7	26	25.3333	24.6667	27.3333	25.8333	7	16.6667	20.6667	18.3333	23.6667	19.8333
8	21.3333	18	22.6667	20	20.5	8	16.2026	18.3565	20.1375	18.3373	18.2585	8	21.3333	28	27.3333	26.6667	25.8333	8	19.6667	20.6667	23.6667	26.6667	22.6667
9	12.6667	15.3333	29.3333	28.6667	21.5	9	21.3333	14	35.3333	27.3333	24.5	9	30.6667	26	27.3333	26.6667	27.6667	9	19	17.3333	16.6667	16.6667	17.4167
10	27.3333	28	27.3333	17.3333	25	10	10	12.6667	18	23.3333	16	10	17.3333	26	27.6667	23.6667	23.6667	10	15.3333	23.3333	17.3333	22.6667	19.6667
11	15.3333	31.3333	20.6667	26.6667	23.5	11	26	29.3333	26.6667	12.6667	23.6667	11	14	20.6667	19	17.3333	17.75	11	14.3333	16.6667	20.3333	17.3333	17.1667
avg	18.4176	21.5127	23.0959	20.7913	20.9544	avg	19.1098	18.9638	21.7376	20.2535	20.0162	avg	21.3812	23.2067	22.4591	22.5292	22.394	avg	18.0298	19.4051	19.0839	20.598	19.2792
error	1.21956	1.46319	1.11169	1.42825	0.69272	error	1.24654	1.3762	1.77737	1.29605	0.822184	error	2.89577	1.27163	1.44909	2.27399	1.46202	error	0.861277	1.09478	0.756996	1.12649	0.759354
stdev	4.04483	4.85287	3.68704	4.73696	2.29749	stdev	4.13431	4.56435	5.89486	4.29851	2.72688	stdev	9.60419	4.21751	4.80609	7.54197	4.84898	stdev	2.85653	3.63097	2.51067	3.73615	2.51849
Figure 3F
	WT vehicle					WT Abeta					APP KO vehicle				APP KO Abeta
#	1st session	2nd session	3rd session	4th session	#	1st session	2nd session	3rd session	4th session	#	1st session	2nd session	3rd session	4th session	#	1st session	2nd session	3rd session	4th session
1	8.77544	10.8887	5.67234	5.51663	1	10.9554	5.08286	5.01613	2.73607	1	4.58236	25.4032	17.2728	3.77044	1	11.1222	2.33567	6.08386	2.54699
2	8.3528	5.42765	7.1516	5.78356	2	19.0524	4.92715	2.11322	8.2527	2	22.3891	16.1161	7.22945	5.95039	2	26.6266	28.0948	12.5014	7.62985
3	12.9018	6.32855	4.18752	4.66022	3	2.85841	2.94739	4.82705	3.93727	3	13.6667	16	20.5	16.3333	3	10.5884	18.4518	8.14147	11.1
4	4.9049	3.41453	5.03837	6.42865	4	4.77144	6.27294	8.14147	9.28706	4	15.6667	8.66667	9.25	8.66667	4	14.8482	27.5609	9.82649	5.48326
5	46.0839	29.5184	17.8512	29.8076	5	33.8116	15.738	10.0211	10.4883	5	49.6667	9	16.6667	10.3333	5	22	14.6667	14	7.33333
6	6.96252	9.23145	4.51563	10.1768	6	60	47.0604	37.5509	27.9057	6	27.6667	13.3333	2.66667	5	6	23.3333	16.3333	12.3333	8.66667
7	29.9544	37.8957	24.0151	8.03025	7	3.32555	7.10711	6.01713	4.81593	7	23.3333	6.33333	6.33333	11	7	16.6667	19	15.3333	4.33333
8	22.3333	27	14.3333	12	8	46.9848	24.202	11.189	7.57424	8	5.33333	26.3333	10	11.6667	8	18.3333	10	10.3333	7.66667
9	13	8.33333	10.6667	11	9	13.3333	32.3333	12.6667	13	9	8.66667	12.6667	12.6667	7.33333	9	24.3333	12	16.3333	7.33333
10	13	8	10.6667	11.6667	10	10.6667	15.3333	7	4.33333	10	10.3333	14.6667	12.3333	4.33333	10	17.3333	16.3333	4.66667	6.66667
11	11.3333	11.3333	8	8.33333	11	14	12.6667	11.6667	7.66667	11	11	6	10.6667	8.33333	11	17.6667	9.33333	9.33333	11.3333
avg	16.1457	14.3065	10.1908	10.3094	avg	19.9781	15.7883	10.5645	9.09066	avg	17.4822	14.0472	11.4169	8.42917	avg	18.4411	15.8282	10.8079	7.28122
error	3.69824	3.47958	1.89893	2.09957	error	5.69926	4.15144	2.8746	2.09795	error	3.93189	2.06593	1.57816	1.13154	error	1.5709	2.29581	1.11558	0.78573
stdev	12.2657	11.5405	6.29805	6.96348	stdev	18.9023	13.7688	9.53397	6.95811	stdev	13.0406	6.8519	5.23418	3.75289	stdev	5.21007	7.61434	3.69998	2.60597
