# Supplementary material for: LTP and memory impairment caused by extracellular Aβ and Tau oligomers is APP-dependent
Source: eLife. 2017 Jul 11;6:e26991. doi: 10.7554/eLife.26991 (PMC5529106; doi:10.7554/eLife.26991)
Supplement: Figure 3—source data 3. — DOI: http://dx.doi.org/10.7554/eLife.26991.011 [file elife-26991-fig3-data3.xlsx]

## Sheet: Fig 3G-H
Figure 3G
	WT vehicle				WT Abeta				APP KO vehicle				APP KO Abeta
#	Day 1	Day 2		#	Day 1	Day 2		#	Day 1	Day 2		#	Day 1	Day 2
1	32.54	6.66		1	15.84	10.9		1	11.55	3.746		1	7.566	14.06
2	18.66	11.84		2	22.42	11.36		2	14.39	2.76		2	7.6	11.92
3	15.84	10.9		3	27.94	17.68		3	9.9166	4.32		3	21.12	9.66
4	2.40796	4.31543		4	6.61217	0.761873		4	20.24	5.12		4	7.29062	2.18552
5	5.23301	2.95851		5	3.20877	0.962073		5	24.4578	14.0752		5	3.81493	0.0889778
6	4.21533	5.09954		6	6.43977	0.939829		6	22.745	11.2501		6	3.48682	1.28462
7	21.4492	9.25926		7	11.5393	5.02725		7	4.85357	1.98646		7	3.58136	1.52375
8	8.50295	15.3264		8	2.43021	2.7027		8	8.42	8.64		8	10.86	12.9
9	5.79468	3.55355		9	3.00856	2.5748		9	12.66	10.42		9	28.24	8.64
10	7.42965	6.11723		10	12.1288	2.49694		10	14.66	12.66		10	19.06	10.64
11	16.9731	11.7496		11	5.82805	13.3244		11	14.46	20.46		11	20.42	16.46
avg	12.6405	7.97996		avg	10.6723	6.24817		avg	14.3957	8.67616		avg	12.0945	8.1239
error	2.79695	1.22471		error	2.5334	1.79994		error	1.81689	1.73003		error	2.59439	1.76086
stdev	9.27644	4.06189		stdev	8.40235	5.96974		stdev	6.02594	5.73785		stdev	8.60462	5.8401
Figure 3H
	WT vehicle				WT Abeta				APP KO vehicle				APP KO Abeta
#	Day 1	Day 2		#	Day 1	Day 2		#	Day 1	Day 2		#	Day 1	Day 2
1	32	44		1	48	50		1	20	8		1	42	90
2	48	14		2	30	86		2	15	6		2	70	64
3	22	24		3	42	88		3	18	10		3	116	50
4	38	55		4	36	6		4	10	5		4	36	7
5	47	9		5	59	17		5	56	45		5	38	1
6	60	39		6	26	8		6	135	96		6	37	18
7	80	47		7	53	25		7	45	23		7	16	3
8	27	54		8	36	22		8	50	40		8	70	86
9	27	29		9	43	30		9	43	56		9	86	42
10	29	80		10	41	10		10	66	68		10	46	30
11	64	10		11	27	29		11	80	62		11	24	42
avg	43.0909	36.8182		avg	40.0909	33.7273		avg	48.9091	38.0909		avg	52.8182	39.3636
error	5.58806	6.66718		error	3.16933	8.77299		error	10.9656	9.16461		error	8.93697	9.46695
stdev	18.5335	22.1125		stdev	10.5115	29.0967		stdev	36.3688	30.3956		stdev	29.6406	31.3983
