# Supplementary material for: LTP and memory impairment caused by extracellular Aβ and Tau oligomers is APP-dependent
Source: eLife. 2017 Jul 11;6:e26991. doi: 10.7554/eLife.26991 (PMC5529106; doi:10.7554/eLife.26991)
Supplement: Figure 4—source data 1. — DOI: http://dx.doi.org/10.7554/eLife.26991.013 [file elife-26991-fig4-data1.xlsx]

## Sheet: Fig 4A-C
Figure 4A
	WT vehicle				WT Tau				APP KO vehicle				APP KO Tau
#	Baseline	24 h		#	Baseline	24 h		#	Baseline	24 h		#	Baseline	24 h
1	14.2809	40.763		1	1.64884	30.5977		1	6.13947	36.0472		1	1.91879	33.0731
2	4.87154	42.4091		2	1.55903	28.7564		2	10.9124	44.3281		2	4.19643	46.5449
3	5.01119	24.9165		3	1.02816	10.5451		3	5.13164	59.7858		3	12.7517	24.1788
4	0.44603	42.6599		4	5.29415	10.744		4	1.11221	42.9983		4	1.82403	50.517
5	0.0889773	43.3763		5	0.800793	7.20717		5	3.20319	36.3027		5	2.40239	40.5513
6	4.84927	44.2663		6	1.69057	29.2958		6	9.25367	46.9133		6	1.91301	38.594
7	0.93426	42.8203		7	1.02324	14.5255		7	0.311421	29.4737		7	3.11421	34.4787
8	1.15671	51.0507		8	0.889773	9.6763		8	2.22244	56.2337		8	2.31341	30.5637
9	15.4598	47.425		9	8.23336	23.8459						9	3.47011	57.3903
10	2.92156	44.1773		10	1.03807	25.5587						10	0.133466	31.2755
11	0.978753	31.2978		11	7.29613	21.0654						11	1.37915	48.4927
				12	0.89	8.5
avg	4.63628	41.3784		avg	2.61601	18.3598		avg	4.7858	44.0103		avg	3.2197	39.6055
error	1.62586	2.19101		error	0.78016	2.60748		error	1.34986	3.63996		error	1.00741	3.04884
stdev	5.39237	7.26675		stdev	2.70255	9.03259		stdev	3.81799	10.2954		stdev	3.3412	10.1119
Figure 4B
	WT vehicle				WT Tau				APP KO vehicle				APP KO Tau
#	Pre-Cued	Cued		#	Pre-Cued	Cued		#	Pre-Cued	Cued		#	Pre-Cued	Cued
1	30.3637	78.0781		1	20.2794	64.1055		1	5.67234	53.4423		1	28.6211	71.7626
2	37.8156	65.0651		2	28.102	71.2908		2	32.5509	90.7305		2	33.3665	46.1396
3	47.9366	88.8353		3	23.0599	86.4614		3	23.3936	95.3264		3	19.3897	90.2077
4	8.89772	52.3191		4	5.22742	52.1629		4	2.0576	54.2762		4	3.61471	54.1279
5	0.611719	27.6201		5	0.222443	11.1963		5	8.84625	89.9783		5	5.78353	41.3003
6	4.99908	58.2061		6	31.0864	79.0783		6	12.0676	54.1649		6	31.865	91.4244
7	15.6267	62.8772		7	1.44588	38.1491		7	17.5285	84.4172		7	27.4718	67.3633
8	27.3049	36.8885		8	6.56207	46.4907		8	5.33864	33.107		8	4.6157	60.0228
9	0.834158	33.5929		9	33.5333	78.0778						9	5.33864	74.2217
10	13.8471	71.9972		10	0.166832	64.2122						10	6.39524	60.0967
11	13.8603	75.9881		11	36.2294	89.1052						11	4.78253	67.1778
				12	8.1	83.4
avg	18.3725	59.2243		avg	16.1679	63.6442		avg	13.4319	69.4304		avg	15.5677	65.8041
error	4.68623	5.97519		error	4.02408	6.6808		error	3.6828	8.24709		error	3.78122	4.81671
stdev	15.5425	19.8175		stdev	13.9398	23.143		stdev	10.4165	23.3263		stdev	12.5409	15.9752
Figure 4C
	WT vehicle				WT Tau				APP KO vehicle				APP KO Tau
#	Visible	Motor	Vocal	#	Visible	Motor	Vocal	#	Visible	Motor	Vocal	#	Visible	Motor	Vocal
1	0.1	0.2	0.5	1	0.1	0.2	0.2	1	0.2	0.3	0.4	1	0.1	0.2	0.3
2	0.1	0.3	0.3	2	0.1	0.2	0.3	2	0.1	0.2	0.3	2	0.1	0.2	0.3
3	0.1	0.2	0.2	3	0.2	0.2	0.3	3	0.1	0.2	0.2	3	0.1	0.2	0.4
4	0.1	0.2	0.3	4	0.1	0.2	0.3	4	0.2	0.3	0.4	4	0.1	0.3	0.4
5	0.1	0.3	0.3	5	0.1	0.2	0.3	5	0.1	0.2	0.4	5	0.1	0.2	0.3
6	0.2	0.2	0.3	6	0.2	0.2	0.3	6	0.1	0.2	0.2	6	0.2	0.3	0.3
7	0.1	0.2	0.3	7	0.1	0.2	0.3	7	0.1	0.2	0.3	7	0.1	0.2	0.4
8	0.1	0.3	0.4	8	0.1	0.2	0.3	8	0.1	0.2	0.3	8	0.1	0.2	0.3
9	0.1	0.2	0.4	9	0.1	0.3	0.4					9	0.1	0.2	0.4
10	0.1	0.2	0.2	10	0.1	0.2	0.2					10	0.2	0.3	0.3
11	0.2	0.2	0.5	11	0.1	0.2	0.4					11	0.1	0.2	0.3
				12	0.1	0.2	0.3
avg	0.118182	0.227273	0.336364	avg	0.116667	0.208333	0.3	avg	0.125	0.225	0.3125	avg	0.118182	0.227273	0.336364
error	0.0121967	0.0140836	0.0309625	error	0.0112367	0.00833333	0.0174078	error	0.0163663	0.0163663	0.0295048	error	0.0121967	0.0140836	0.015212
stdev	0.040452	0.0467099	0.102691	stdev	0.0389249	0.0288675	0.0603023	stdev	0.046291	0.046291	0.0834523	stdev	0.040452	0.0467099	0.0504525
