# Supplementary material for: LTP and memory impairment caused by extracellular Aβ and Tau oligomers is APP-dependent
Source: eLife. 2017 Jul 11;6:e26991. doi: 10.7554/eLife.26991 (PMC5529106; doi:10.7554/eLife.26991)
Supplement: Figure 4—source data 2. — DOI: http://dx.doi.org/10.7554/eLife.26991.014 [file elife-26991-fig4-data2.xlsx]

## Sheet: Fig 4D-F
Figure 4D
	WT vehicle											APP KO vehicle
	DAY 1					DAY 2						DAY 1					DAY 2
#	Block 1	Block 2	Block 3	Block 4	Block 5	Block 6	Block 7	Block 8	Block 9	Block 10	#	Block 1	Block 2	Block 3	Block 4	Block 5	Block 6	Block 7	Block 8	Block 9	Block 10
1	5.33333	1.66667	2	1	2.66667	2.33333	1	0	2.33333	0.333333	1	4	4.66667	2.33333	2.66667	3.66667	2.66667	2.33333	1.33333	1	0.666667
2	5.33333	4.66667	3.33333	3	1.66667	1.66667	2	2	0.666667	0.666667	2	5.66667	3.66667	3	3.33333	1.33333	1.66667	2.33333	2	2	2
3	5.66667	3.66667	2.66667	4	2.66667	3.66667	2.66667	2.33333	2	1.33333	3	3	4.33333	2.66667	2	1.66667	4.66667	1.66667	2.33333	0	0.333333
4	5	3	0.666667	2.66667	0.333333	1	1	0.666667	0.333333	0.333333	4	4	1	3.66667	3.33333	2	3	2	1	1.66667	1.33333
5	3.66667	2.66667	1.33333	3	2	2	0.333333	1.33333	0.333333	1	5	5.66667	3.33333	1.66667	2.33333	1.66667	0.333333	0.666667	0.666667	1.33333	0
6	1.33333	1.66667	3.33333	1	1.66667	0.666667	0	0.666667	0.333333	0	6	4.33333	5.33333	0.666667	3.66667	2.33333	0.666667	0	0.333333	1.66667	0
7	3.66667	5	3	Il	0.666667	2.66667	2	0	0	1.66667	7	5.33333	4	3.66667	2.66667	1.33333	2.33333	2.33333	1.66667	1.33333	1.33333
8	4.33333	4	3.33333	3.33333	1.33333	3	0	0.333333	0.666667	0
9	5.33333	4	4	1.33333	4	1.33333	1.33333	0.666667	1	1.33333
10	5.33333	4	1	2.33333	1.66667	3.33333	2.33333	2.33333	1	0.666667
11	6.66667	4	2.33333	2.66667	1.66667	0.666667	3	1	1	1.33333
avg	4.69697	3.48485	2.45455	2.43333	1.84848	2.0303	1.42424	1.0303	0.878788	0.787879	avg	4.57143	3.7619	2.52381	2.85714	2	2.19048	1.61905	1.33333	1.28571	0.809524
error	0.427477	0.334433	0.328057	0.307227	0.302727	0.319262	0.31811	0.259971	0.216831	0.175653	error	0.382931	0.523088	0.410556	0.228373	0.308607	0.558044	0.352081	0.272166	0.245904	0.289655
stdev	1.41778	1.10919	1.08804	1.01896	1.00403	1.05887	1.05505	0.862226	0.719147	0.582575	stdev	1.01314	1.38396	1.08623	0.604218	0.816497	1.47645	0.931518	0.720082	0.6506	0.766356
	WT Tau											APP KO Tau
	DAY 1					DAY 2						DAY 1					DAY 2
#	Block 1	Block 2	Block 3	Block 4	Block 5	Block 6	Block 7	Block 8	Block 9	Block 10	#	Block 1	Block 2	Block 3	Block 4	Block 5	Block 6	Block 7	Block 8	Block 9	Block 10
1	4.33333	3.33333	4.33333	4	3	4	3.66667	1.66667	3.33333	3	1	4.33333	1.33333	1.66667	0.666667	1.66667	0.333333	0.333333	0	0.666667	0.333333
2	6.66667	5.33333	5	4.33333	4	3.33333	2.33333	3.33333	2.33333	1.33333	2	4.66667	4.66667	5.66667	2.66667	4.66667	3.66667	1.66667	2	2	1
3	4.33333	4.33333	2.66667	4.33333	3.33333	5	2.33333	3.66667	3.33333	1.66667	3	5.66667	4.66667	3	3	1.66667	1.33333	4.33333	2.33333	2	1.66667
4	5.33333	7	2.66667	2.33333	2.66667	2.33333	3.66667	1.66667	0.333333	2	4	4.33333	2.33333	3	1.33333	1.33333	2.33333	2.33333	1.66667	0	0
5	4.66667	5.66667	5	2	3.66667	4	3	1.33333	3.33333	2.33333	5	2.66667	2.66667	4.66667	0.666667	1.66667	1.66667	0.333333	0.333333	1	1
6	5.66667	3	6.33333	4	4.66667	3	4.33333	4	4.33333	3.66667	6	3.66667	2	2.66667	4.66667	1	1.66667	0	0	1.33333	0.666667
7	6.33333	5.66667	3	2	2.66667	4	5	2.66667	4.33333	1.66667	7	3.33333	2	2	2.33333	3	2	2	1.66667	0.666667	0.333333
8	3.66667	6	6	6	6	4.33333	2.33333	4.33333	4	3	8	4.33333	2	1.66667	3	2	1	0.666667	0.333333	1.66667	1
9	4.66667	3.33333	2.33333	3.33333	3.66667	2.66667	4.33333	4.66667	3.66667	3
10	5.33333	4.33333	4	4	3	4	3.66667	4	3	3.33333
11	6.66667	5.66667	3.66667	3	1.66667	0.666667	0.333333	1.66667	0.666667	0.333333
12	2.33333	2.66667	3	2.66667	3.33333	3.33333	1.66667	0.333333	0.333333	1
avg	5	4.69444	4	3.5	3.47222	3.38889	3.05556	2.77778	2.75	2.19444	avg	4.125	2.70833	3.04167	2.29167	2.125	1.75	1.45833	1.04167	1.16667	0.75
error	0.369274	0.400879	0.389249	0.339588	0.316383	0.327816	0.380132	0.406871	0.432526	0.297176	error	0.320822	0.44738	0.509581	0.481555	0.417559	0.349319	0.511524	0.341783	0.251976	0.186339
stdev	1.2792	1.38869	1.3484	1.17637	1.09598	1.13559	1.31682	1.40944	1.49832	1.02945	stdev	0.907421	1.26538	1.44131	1.36204	1.18103	0.988024	1.44681	0.966708	0.712697	0.527046
Figure 4E
	WT vehicle						WT Tau						APP KO vehicle						APP KO Tau
					avg						avg						avg						avg
#	1st session	2nd session	3rd session	4th session	bar graph	#	1st session	2nd session	3rd session	4th session	bar graph	#	1st session	2nd session	3rd session	4th session	bar graph	#	1st session	2nd session	3rd session	4th session	bar graph
1	17.187	18.8155	20.1798	23.9357	20.0295	1	20.6442	27.3882	24.9439	27.7485	25.1812	1	16.179	17.8519	19.4462	17.8284	17.8264	1	21.5348	24.0859	18.2948	18.2401	20.5389
2	24.1558	19.5545	20.1005	20.3451	21.039	2	18.9342	18.1479	17.0332	17.2465	17.8404	2	15.1842	14.4987	16.3653	20.3577	16.6014	2	22.2005	21.3819	16.5574	24.2638	21.1009
3	24.1436	16.6767	24.5313	20.1952	21.3867	3	22.2518	21.9561	22.3722	21.3069	21.9718	3	24.433	18.7067	15.9858	17.6982	19.2059	3	10.6326	10.6097	14.8988	13.9931	12.5335
4	19.282	26.4518	20.5061	23.2902	22.3825	4	22.1159	18.9098	24.0977	23.9896	22.2783	4	14.6989	26.8727	16.6159	15.4483	18.409	4	21.462	24.9622	23.401	29.1644	24.7474
5	18.0334	16.4731	16.997	12.9245	16.107	5	18.3698	18.9367	20.504	20.8006	19.6528	5	17.0226	18.8495	18.069	21.8266	18.9419	5	13.0724	23.4846	14.2164	16.927	16.9251
6	19.1391	23.3312	20.4646	20.7607	20.9239	6	21.1582	19.9827	23.6775	23.779	22.1494	6	17.6556	16.8336	19.994	21.5051	18.9971	6	14.1573	16.8395	16.3675	17.1996	16.141
7	16.6774	14.67	14.9759	21.2102	16.8834	7	17.3354	18.4397	18.292	21.2611	18.8321	7	18.2039	17.7732	19.0559	15.9829	17.754	7	12.6637	16.8558	21.4598	19.5127	17.623
8	16.1899	20.2096	19.4926	21.1063	19.2496	8	19.9512	20.8403	21.7984	19.5953	20.5463							8	18.4784	20.9944	15.7749	18.7989	18.5116
9	20.0861	23.6461	23.2182	21.9361	22.2216	9	13.7371	16.7696	20.6773	17.1004	17.0711
10	15.6897	18.0171	16.5626	16.6463	16.7289	10	22.2613	17.8451	19.0965	18.5951	19.4495
11	19.2285	20.0479	21.2348	18.0987	19.6525	11	22.8389	18.5261	19.2063	20.1039	20.1688
						12	15.516	17.5865	22.7914	20.9261	19.205
avg	19.0739	19.8085	19.8421	20.0408	19.6913	avg	19.5928	19.6107	21.2075	21.0377	20.3622	avg	17.6253	18.7695	17.9331	18.6639	18.248	avg	16.7752	19.9017	17.6213	19.7624	18.5152
error	0.867495	1.0578	0.847385	0.945777	0.671993	error	0.83808	0.819091	0.716638	0.87147	0.645247	error	1.23112	1.45974	0.613359	0.977144	0.349121	error	1.64835	1.71304	1.14729	1.68958	1.2981
stdev	2.87716	3.50833	2.81046	3.13679	2.22875	stdev	2.9032	2.83741	2.48251	3.01886	2.2352	stdev	3.25724	3.8621	1.6228	2.58528	0.923687	stdev	4.66223	4.84522	3.24502	4.77885	3.67157
Figure 4F
	WT vehicle					WT Tau					APP KO vehicle					APP KO Tau
#	1st session	2nd session	3rd session	4th session	#	1st session	2nd session	3rd session	4th session	#	1st session	2nd session	3rd session	4th session	#	1st session	2nd session	3rd session	4th session
1	10.2325	5.46102	7.24057	5.02725	1	20.9988	9.84318	2.72495	2.84729	1	11.2779	9.23145	5.19408	4.18196	1	7.20721	6.97364	4.43777	6.30631
2	14.3699	14.8037	8.18596	5.91703	2	29.4872	18.3547	18.8411	11.0333	2	21.3992	8.64197	7.59648	8.06362	2	14.0251	6.16172	2.36904	2.98076
3	11.4781	7.91903	2.86954	9.16472	3	3.31442	5.66122	6.18396	11.9564	3	11.1334	13.3356	3.92615	3.71483	3	30.5216	16.8057	9.00234	27.2382
4	6.48426	3.54799	1.84629	3.89278	4	9.96552	7.67434	4.37104	2.32455	4	27.5164	2.9029	21.2323	10.922	4	13.2466	8.31943	5.62785	3.58136
5	12.0676	12.5681	19.1191	18.0403	5	9.53175	5.67234	7.47414	4.82705	5	10.1101	8.1526	5.01613	3.71483	5	16.1717	3.35891	5.93927	7.31843
6	27.0515	4.88266	4.99388	1.85675	6	15.2708	7.81893	2.91402	4.09298	6	16.2508	7.94127	6.9934	4.78607	6	18.8411	12.1232	7.08486	6.8513
7	15.5822	7.68546	8.48626	10.1768	7	25.9615	12.2901	8.70871	5.62485	7	16.3542	8.98758	8.91443	7.45363	7	41.44	16.2486	8.39375	5.47046
8	10.7107	6.21733	4.13747	2.85841	8	24.3021	10.7997	11.7451	11.0444						8	20.4678	10.4739	6.77489	6.84638
9	15.0039	11.0777	7.97464	3.38116	9	12.8128	4.66022	6.18396	7.20721
10	16.561	4.3043	3.98176	2.99188	10	12.7238	15.5489	12.0231	5.75019
11	25.7391	37.0949	3.48126	9.50951	11	15.9826	13.0353	6.19508	6.57324
					12	17.0393	8.34167	6.09498	6.01713
avg	15.0255	10.5057	6.57425	6.61969	avg	16.4492	9.97504	7.78834	6.60821	avg	16.2917	8.45619	8.41043	6.11957	avg	20.2401	10.0581	6.20372	8.32415
error	1.90306	2.8715	1.43601	1.44241	error	2.19211	1.21446	1.3152	0.92224	error	2.40062	1.1539	2.23234	1.04336	error	3.8524	1.69499	0.75541	2.75929
stdev	6.31173	9.52369	4.76271	4.78392	stdev	7.59371	4.207	4.55598	3.19473	stdev	6.35143	3.05293	5.90622	2.76046	stdev	10.8962	4.79415	2.13662	7.80446
