# Supplementary material for: LTP and memory impairment caused by extracellular Aβ and Tau oligomers is APP-dependent
Source: eLife. 2017 Jul 11;6:e26991. doi: 10.7554/eLife.26991 (PMC5529106; doi:10.7554/eLife.26991)
Supplement: Figure 4—source data 3. — DOI: http://dx.doi.org/10.7554/eLife.26991.015 [file elife-26991-fig4-data3.xlsx]

## Sheet: Fig 4G-H
Figure 4G
	WT vehicle				WT Tau				APP KO vehicle				APP KO Tau
#	Day 1	Day 2		#	Day 1	Day 2		#	Day 1	Day 2		#	Day 1	Day 2
1	24.7025	5.82249		1	1.24569	2.35791		1	7.84117	6.58992		1	5.23301	3.58136
2	2.05205	0.467134		2	5.86142	9.92659		2	1.42365	1.36247		2	17.1672	3.13091
3	3.75375	1.2012		3	17.0837	29.9244		3	6.13391	1.62385		3	3.30886	1.0733
4	1.69614	2.04093		4	1.21232	0.556111		4	8.11923	3.01413		4	14.3977	3.69814
5	2.61929	0.55055		5	2.49694	0.728506		5	25.798	2.64153		5	4.64353	3.64253
6	22.8451	18.4073		6	7.49082	15.0706		6	24.4578	14.0752		6	29.9132	19.6975
7	8.33055	6.3786		7	7.44077	7.81893		7	22.745	11.2501		7	1.2735	0.211322
8	6.21733	7.99132		8	14.2643	12.151						8	10.6996	8.26382
9	11.8507	2.33011		9	8.04137	6.7512
10	8.76988	17.3173		10	10.4493	5.95596
11	4.76032	1.9742		11	6.55656	5.26082
				12	10.1713	14.9705
avg	8.87251	5.86192		avg	7.69288	9.28938		avg	13.7884	5.79389		avg	10.8296	5.41236
error	2.41638	1.94151		error	1.40493	2.35752		error	3.83367	1.91284		error	3.36624	2.20673
stdev	8.01422	6.43926		stdev	4.86682	8.1667		stdev	10.1429	5.06089		stdev	9.52117	6.24159
Figure 4H
	WT vehicle				WT Tau				APP KO vehicle				APP KO Tau
#	Day 1	Day 2		#	Day 1	Day 2		#	Day 1	Day 2		#	Day 1	Day 2
1	93	23		1	7	10		1	41	34		1	50	28
2	21	4		2	62	82		2	5	4		2	59	20
3	13	13		3	48	94		3	24	8		3	30	4
4	21	14		4	10	10		4	35	28		4	63	22
5	14	11		5	21	9		5	90	14		5	30	23
6	106	67		6	92	51		6	128	89		6	70	74
7	28	33		7	34	42		7	135	96		7	2	5
8	38	42		8	55	73						8	70	37
9	95	10		9	35	35
10	123	71		10	34	23
11	57	27		11	11	45
				12	58	63
avg	55.3636	28.6364		avg	38.9167	44.75		avg	65.4286	39		avg	46.75	26.625
error	12.4486	6.89041		error	7.32106	8.37214		error	19.6697	14.3974		error	8.52465	7.80553
stdev	41.2875	22.8529		stdev	25.3609	29.002		stdev	52.0412	38.092		stdev	24.1113	22.0774
