# Supplementary material for: LTP and memory impairment caused by extracellular Aβ and Tau oligomers is APP-dependent
Source: eLife. 2017 Jul 11;6:e26991. doi: 10.7554/eLife.26991 (PMC5529106; doi:10.7554/eLife.26991)
Supplement: Figure 5—source data 1. — DOI: http://dx.doi.org/10.7554/eLife.26991.017 [file elife-26991-fig5-data1.xlsx]

## Sheet: Fig 5A
Figure 5A
	WT Vehicle
	fEPSP slope
Stim intensity	Slice 1	Slice 2	Slice 3	Slice 4	Slice 5	Slice 6	Slice 7	Slice 8	Slice 9	Slice 10	Slice 11	Slice 12	Slice 13	Slice 14	Slice 15	Slice 16	Slice 17	Slice 18	AVG	ERROR	STDEV
5	0.654259	0.0793041	0.396729	-0.0277433	0.0832298	0.0877396	0.345362	0.16646	0.305176	0.508626	-0.152588	1.37329	0.268729	0.348772	0.162471	0.135634	0.211276	0.174386	0.284506	0.0782127	0.331828
7	0.775034	0.0397453	0.518799	-0.0277433	0.416149	0.307895	0.784738	0.443892	0.457764	1.25461	0.801086	1.72008	0.629343	0.435965	0.372993	0.289152	0.464764	0.348772	0.557391	0.097203	0.412398
9	1.07312	0.447135	0.854492	0.437763	1.96977	0.230921	1.27946	0.194203	0.612736	1.92739	0.839233	1.91428	0.712077	0.566755	0.400543	0.679378	0.366211	0.352778	0.825459	0.137489	0.583317
11	0.858499	0.67567	0.978366	0.640869	3.05176	0.410527	1.61307	0.751984	0.762939	2.09808	1.15837	1.94203	0.971736	0.741141	0.762939	0.887784	0.406901	0.264726	1.0543	0.16568	0.702919
13	0.846755	0.760129	1.30393	1.13747	3.9118	0.410527	2.04904	0.813802	1.02997	2.17438	1.90735	1.88654	1.06812	0.963727	0.724792	0.943271	0.824356	0.942028	1.31655	0.193507	0.820982
15	0.931856	1.15261	1.41491	1.05424	4.3002	0.436184	2.54928	0.890096	0.991821	2.36511	2.63214	2.19172	1.27758	0.828334	0.553131	1.10973	0.661214	0.884055	1.4569	0.231936	0.984022
20	0.968463	1.11287	1.44265	1.05424	5.52215	0.513158	2.22342	1.09355	0.991821	2.82288	2.21252	2.27495	1.39025	0.963727	0.749068	1.48773	1.12187	1.23736	1.62126	0.270572	1.14794
25	0.710253	1.43083	1.80331	1.43433	5.3267	0.846711	3.07356	1.32243	0.745985	2.93732	3.8147	2.35818	1.35634	1.04632	0.804554	1.18256	0.96639	1.91553	1.83755	0.292883	1.2426
30	0.715416	2.01211	1.99751	1.35628	4.77184	0.898027	3.18255	1.39872	0.576443	3.20435	4.4632	2.44141	1.05116	0.959124	0.676849	1.41144	1.38272	2.48828	1.94374	0.297619	1.26269
35	0.779284	2.50395	1.74782	1.34277	4.05051	0.692764	3.26974	1.32243	0.983344	3.31879	3.89099	2.46915	1.08507	1.00272	0.823362	1.60217	1.56403	2.48828	1.94095	0.259041	1.09902
	APP KO Vehicle
	fEPSP slope
Stim intensity	Slice 1	Slice 2	Slice 3	Slice 4	Slice 5	Slice 6	Slice 7	Slice 8	Slice 9	Slice 10	Slice 11	Slice 12	Slice 13	Slice 14	Slice 15	Slice 16	Slice 17	Slice 18	AVG	ERROR	STDEV
5	0.137912	0.648499	0.108991	0.0762939	0.283377	0.940959	0.0915527	0.304281	0.152588	0.366211	0.29287	0.153817	0.29246	0.146484	0.179515	0.125661	0.138716	0.0825514	0.251263	0.0522512	0.221683
7	0.534058	0.926627	0.217983	0.254313	0.326974	1.24613	0.0610352	0.0939002	0.203451	0.834147	0.845485	0.267029	0.386556	0.14085	0.215625	0.375601	0.488281	0.213623	0.423982	0.0778992	0.330498
9	0.788371	1.02997	0.325521	0.38147	0.943597	1.44958	0.183105	0.117375	0.271267	1.46484	2.05517	0.343323	0.804554	0.286102	0.593397	0.375601	0.228882	0.388406	0.668363	0.126783	0.537893
11	0.813802	1.10626	0.528971	0.483195	1.59128	1.57674	0.277433	0.1878	0.339084	1.68864	2.72751	0.495911	0.982608	0.52588	0.697545	0.845102	0.416149	0.665838	0.886097	0.152409	0.646618
13	1.04268	1.02997	0.732422	0.635783	1.70572	1.6276	0.305176	0.164325	0.542535	2.24813	3.15666	0.776367	1.61035	0.832298	1.2207	0.849143	0.427246	0.915527	1.10126	0.174998	0.742455
15	1.19527	0.953674	0.893729	0.955949	2.75277	1.47502	0.332919	0.446026	0.440809	2.53296	3.5429	0.866455	1.80455	0.930518	1.48228	0.915527	0.471635	1.37329	1.29813	0.205803	0.873149
20	1.09355	0.953674	0.871931	1.66121	3.58138	1.65304	0.527122	0.304281	0.610352	2.41187	3.75271	0.960518	1.95271	1.53908	1.17711	1.18679	0.572205	1.58137	1.46616	0.227664	0.965898
25	1.55131	1.02997	1.13351	1.8901	3.89518	1.57674	0.721325	0.719343	0.84771	2.83518	3.69549	1.11509	2.52712	2.50155	1.50408	1.28852	0.678168	1.35942	1.71499	0.232991	0.988497
30	1.297	1.87738	1.08991	1.71208	3.87738	1.65304	0.976563	0.871931	1.11898	3.01238	4.23266	1.13521	2.04632	2.00272	1.32969	1.15289	0.745985	1.55362	1.76032	0.234492	0.994865
35	1.42415	1.83923	1.08991	1.66584	0.934601	1.65304	1.00708	1.00272	1.45806	3.0616	4.23929	0.94695	2.78474	2.93733	1.32969	1.68736	0.839233	1.67847	1.75441	0.217561	0.923033
