# Supplementary material for: LTP and memory impairment caused by extracellular Aβ and Tau oligomers is APP-dependent
Source: eLife. 2017 Jul 11;6:e26991. doi: 10.7554/eLife.26991 (PMC5529106; doi:10.7554/eLife.26991)
Supplement: Figure 5—source data 2. — DOI: http://dx.doi.org/10.7554/eLife.26991.018 [file elife-26991-fig5-data2.xlsx]

## Sheet: Fig 5B
Figure 5B
	WT VEHICLE												APP KO VEHICLE															WT Abeta													APP KO Abeta
	Slice 1	Slice 2	Slice 3	Slice 4	Slice 5	Slice 6	Slice 7	Slice 8	Slice 9	AVG	ERROR	STDEV		Slice 1	Slice 2	Slice 3	Slice 4	Slice 5	Slice 6	Slice 7	Slice 8	Slice 9	Slice 10	AVG	ERROR	STDEV		Slice 1	Slice 2	Slice 3	Slice 4	Slice 5	Slice 6	Slice 7	Slice 8	Slice 9	AVG	ERROR	STDEV		Slice 1	Slice 2	Slice 3	Slice 4	Slice 5	Slice 6	AVG	ERROR	STDEV
Baseline 1	99.9478	101.886	108.329	94.0896	94.6809	99.5473	92.7824	91.5527	135.634	102.05	4.55179	13.6554	Baseline 1	92.3985	96.8897	108.329	94.0975	105.239	99.5473	99.1169	93.1986	86.4021	100.176	97.5395	2.02968	6.4184	Baseline 1	96.9698	106.232	101.558	100.643	95.6065	99.5473	86.4368	106.842	91.4447	98.3644	2.20559	6.61677	Baseline 1	80.6955	116.002	107.285	94.0975	104.806	99.7746	100.444	4.96193	12.1542
2	99.8368	101.507	94.0865	105.812	94.3159	94.1817	112.904	95.1112	80.5325	97.5875	3.01439	9.04317	2	102.228	95.206	94.0865	102.457	107.993	94.1817	106.942	103.113	84.363	100.176	99.0747	2.26217	7.15361	2	103.03	99.1501	97.8592	99.1392	101.24	94.1817	102.448	104.937	117.897	102.209	2.22788	6.68363	2	102.703	89.2327	93.1798	102.457	107.548	94.3967	98.2531	2.86277	7.01233
3	101.031	110.563	93.7318	92.3699	104.489	91.69	98.2131	94.0958	93.2481	97.7146	2.16019	6.48056	3	103.244	105.76	94.4048	94.2475	103.862	88.2663	99.1169	115.011	98.6641	87.6542	99.0231	2.64883	8.37634	3	96.9874	94.9876	98.3846	99.4231	99.4925	88.2663	104.444	105.597	85.3127	96.9884	2.23684	6.71053	3	88.0315	107.079	106.078	94.2476	103.435	88.4678	97.8898	3.56587	8.73455
4	100.404	97.2982	107.488	103.447	99.2645	93.0213	96.6538	93.7508	93.2481	98.2862	1.64176	4.92528	4	99.4433	88.6909	107.488	94.0975	100.774	102.686	99.1169	89.2327	98.6641	87.6542	96.7848	2.09357	6.62046	4	101.212	106.232	101.773	101.257	103.775	93.0213	88.0179	89.8517	91.4472	97.3986	2.25705	6.77115	4	110.039	98.156	106.452	94.0975	100.359	93.2337	100.39	2.74265	6.71808
5	99.9478	96.995	94.4048	90.7074	95.7815	99.1228	89.4288	91.5527	110.203	96.4604	2.10718	6.32153	5	94.4468	93.0204	97.0534	92.2226	100.043	94.1817	91.2919	93.1986	89.2709	102.959	94.7688	1.31183	4.14838	5	96.9696	99.1501	102.125	99.3187	101.777	99.1228	86.4368	116.251	91.4466	99.1775	2.7232	8.16961	5	102.703	89.2327	93.495	92.2227	99.6308	99.3491	96.1056	2.12609	5.20783
6	100.627	101.886	95.5045	98.0512	103.909	104.402	98.2131	93.7508	122.522	102.096	2.81995	8.45984	6	103.244	94.4185	96.0952	99.6891	105.239	104.402	96.5086	103.113	105.044	100.176	100.793	1.26892	4.01267	6	96.9696	92.0677	97.1774	97.5923	96.7405	104.402	103.13	106.251	104.314	99.8494	1.5949	4.78471	6	110.039	116.002	94.5841	99.6892	104.806	104.64	104.96	3.07302	7.52732
7	101.031	93.7223	97.2422	100.282	102.747	107.156	98.2131	91.5527	110.203	100.239	1.98968	5.96905	7	107.335	100.82	98.4585	101.957	103.862	107.156	114.767	102.134	112.645	100.176	104.931	1.71981	5.43851	7	103.03	89.4639	96.0046	101.722	95.6065	107.156	107.405	116.251	85.3127	100.217	3.21421	9.64263	7	117.375	89.2327	97.5097	101.957	107.548	107.4	103.504	3.94101	9.65346
8	100.462	93.5731	107.488	105.812	105.297	99.5473	115.14	110.527	93.2481	103.455	2.46594	7.39782	8	99.4433	118.29	107.488	107.579	103.862	99.5473	96.5086	89.2327	112.645	97.3936	103.199	2.6997	8.5372	8	103.03	99.1501	103.736	100.017	93.0168	99.5473	88.0179	90.5119	96.2456	97.0303	1.83012	5.49037	8	80.6955	98.156	106.452	107.579	103.435	99.7746	99.3488	4.01849	9.84326
9	99.9569	91.7087	108.329	100.282	102.747	100.655	89.4288	93.7508	131.395	102.028	4.15934	12.478	9	103.244	82.3411	108.329	94.3186	100.774	99.5473	104.334	93.1986	113.76	109.916	100.976	2.92115	9.23749	9	96.9698	106.232	98.2651	101.047	100.814	100.655	105.632	94.13	110.75	101.611	1.7144	5.14321	9	102.703	124.926	107.285	94.3186	100.359	100.885	105.08	4.32071	10.5835
10	100.601	99.1335	96.0952	94.0896	103.678	97.1235	90.5467	110.527	72.0553	95.9834	3.55314	10.6594	10	102.228	83.6092	96.0952	95.6614	90.7074	97.1235	99.3433	103.113	99.8682	109.916	97.7665	2.26298	7.15617	10	101.212	92.0677	100.745	99.3857	102.999	97.1235	102.002	90.5119	91.4447	97.4991	1.63948	4.91844	10	106.312	98.156	95.1691	95.6614	92.3173	97.3453	97.4936	1.94751	4.77039
11	100.172	137.059	97.0534	94.0896	96.1359	99.7403	112.904	94.0958	110.203	104.606	4.63467	13.904	11	99.4433	101.2	97.0534	95.6614	92.5514	99.7403	106.942	115.011	90.5389	102.959	100.11	2.25209	7.12174	11	101.212	105.885	97.8592	102.677	100.814	99.7403	86.4368	113.14	117.184	102.772	2.96116	8.88349	11	110.039	80.3094	96.118	95.6614	92.1703	99.9681	95.7111	3.97214	9.72972
12	98.6671	95.3455	98.8385	101.85	92.653	105.707	97.2538	127.156	93.2481	101.191	3.52096	10.5629	12	88.4667	107.48	98.8385	103.551	90.7074	105.707	99.1169	89.2327	90.8907	97.3936	97.1384	2.22723	7.04311	12	103.03	99.1501	100.616	100.383	102.959	105.707	113.448	94.2832	91.4447	101.224	2.12455	6.37366	12	95.3674	80.3094	97.886	103.551	90.3339	105.948	95.566	3.81711	9.34997
13	100.979	95.3455	106.857	103.417	95.8802	97.6896	97.2538	110.527	72.0553	97.7783	3.64858	10.9457	13	102.228	104.748	94.4048	105.145	98.0512	97.6896	93.9002	93.1986	108.129	97.3936	99.4889	1.66051	5.25099	13	96.9696	92.0677	98.7387	97.1634	102.982	97.6896	105.437	94.2832	110.749	99.5645	1.94382	5.83146	13	110.039	107.079	105.827	105.145	97.6474	97.9126	103.942	2.06555	5.05954
14	95.8005	83.4273	97.1502	105.132	99.6189	102.686	98.2131	91.5527	110.203	98.1981	2.59146	7.77438	14	103.244	112.677	98.8385	106.888	98.9692	102.686	96.5086	103.113	96.9636	97.3936	101.728	1.62048	5.12442	14	101.212	106.232	106.196	100.417	101.406	106.129	118.851	86.7405	104.315	103.5	2.78375	8.35126	14	95.3674	99.0778	96.2139	106.888	98.5616	102.92	99.8382	1.77515	4.34821
15	100.537	100.549	97.4035	110.58	108.802	107.738	112.904	110.527	72.0553	102.344	4.19228	12.5768	15	99.4433	114.85	103.18	112.427	97.4446	107.738	96.5086	115.011	112.162	109.916	106.868	2.27016	7.17889	15	101.212	111.995	99.0783	99.8912	100.892	107.738	102.002	90.5119	110.751	102.675	2.21144	6.63433	15	88.0315	107.079	96.4648	112.427	97.0433	107.984	101.505	3.73803	9.15628
Drugs 1	99.7421	110.563	93.7318	93.6918	94.3159	99.3315	91.6645	94.0958	93.2481	96.7093	1.95771	5.87312	Drugs 1	88.4667	86.4658	93.7318	99.6891	97.4724	99.3315	91.2919	89.2327	87.8518	89.0455	92.2579	1.57184	4.9706	Drugs 1	96.9696	92.0677	103.736	97.5731	102.982	99.3315	90.0383	86.7405	104.315	97.0838	2.103	6.309	Drugs 1	110.039	107.079	93.3305	96.1074	97.9455	100.48	100.83	2.65111	6.49388
2	99.9478	95.3455	94.0865	92.5514	94.3159	93.0213	103.961	95.1112	110.203	97.6159	1.99184	5.97552	2	92.3985	85.3629	94.0865	92.5514	92.699	93.0213	96.5086	93.1986	108.031	102.959	95.0817	1.98408	6.2742	2	96.9874	106.232	97.1774	97.5923	93.0168	106.129	122.452	94.13	107.725	102.382	3.10722	9.32166	2	106.312	116.002	93.6837	94.9377	93.149	94.0969	99.697	3.84135	9.40934
3	100.627	93.5731	107.11	90.7074	104.489	99.1228	112.904	91.5527	122.522	102.512	3.51158	10.5348	3	103.244	84.48	107.11	90.7074	100.961	99.1228	114.767	103.113	112.609	100.176	101.629	2.88719	9.1301	3	103.03	111.995	98.7214	100.744	101.24	99.1228	86.4368	116.251	104.314	102.428	2.81649	8.44946	3	110.039	107.079	106.652	93.0461	101.451	100.269	103.089	2.5061	6.13867
4	101.031	101.886	107.488	98.0512	102.747	104.402	97.2538	93.7508	110.203	101.868	1.71064	5.13193	4	94.4468	96.2064	107.488	101.957	90.7074	104.402	99.3433	115.011	89.0533	100.176	99.8792	2.48628	7.86231	4	103.03	99.1501	98.9802	99.8987	99.4925	104.402	103.13	90.5119	110.749	101.038	1.81142	5.43427	4	117.375	133.849	107.028	100.579	106.673	105.609	111.852	4.93464	12.0873
5	100.462	96.995	94.4048	100.282	103.909	107.156	98.2131	91.5527	93.2481	98.4692	1.69215	5.07645	5	88.4667	80.8538	94.4048	100.282	100.043	107.156	104.334	102.134	108.384	97.3936	98.3451	2.69817	8.53236	5	96.9874	106.232	94.4634	98.5689	93.0168	107.156	104.444	79.1979	91.4447	96.8346	2.92519	8.77557	5	80.6955	99.0778	94.0006	102.868	100.528	108.395	97.5941	3.88909	9.52628
6	99.9569	99.1335	95.5045	105.812	102.747	99.5473	90.5467	110.527	131.395	103.908	3.92797	11.7839	6	99.4433	111.426	103.18	105.812	105.239	99.5473	104.334	93.1986	99.5723	109.916	103.167	1.7181	5.4331	6	96.9696	99.1501	98.9264	101.8	101.777	99.5473	88.0179	90.5119	110.75	98.6056	2.20267	6.60802	6	102.703	116.002	95.0956	108.54	105.75	100.698	104.798	2.91993	7.15234
7	100.601	101.886	98.4585	94.0896	103.678	97.6896	103.961	93.7508	72.0553	96.2412	3.26722	9.80166	7	99.4433	105.257	98.4585	107.579	107.993	99.5473	99.3433	103.113	121.981	111.307	105.402	2.31218	7.31175	7	96.9696	106.232	103.736	97.5923	103.775	97.6896	86.4368	89.8517	96.2456	97.6143	2.16407	6.49221	7	106.312	98.156	98.037	96.5156	108.517	98.8192	101.06	2.053	5.02879
8	101.031	95.3455	107.488	94.0896	99.2645	102.686	96.6538	116.984	93.2481	100.755	2.53204	7.59611	8	110.243	103.077	107.488	94.0896	100.774	102.686	106.942	89.2327	89.287	102.959	100.678	2.3482	7.42565	8	101.212	99.1501	100.715	101.709	95.6065	106.129	111.006	94.2832	117.184	102.999	2.4456	7.33679	8	80.6955	80.3094	96.2139	96.5156	104.366	103.873	93.6623	4.39671	10.7697
9	100.462	100.549	108.329	101.85	94.3159	107.738	98.2131	95.1112	67.8169	97.154	4.00598	12.0179	9	103.244	106.792	108.329	101.85	100.774	107.738	99.1169	93.1986	97.296	87.6542	100.599	2.08996	6.60905	9	96.9696	92.0677	97.1774	99.2938	103.775	107.738	86.4368	86.7405	104.315	97.1683	2.53018	7.59055	9	102.703	99.0778	107.865	104.476	101.263	108.984	104.062	1.56404	3.83111
10	99.9569	110.563	98.4585	103.417	99.2645	99.3315	90.5467	110.527	72.0553	98.2356	3.87242	11.6173	10	102.228	82.9117	98.4585	103.417	92.699	99.5473	96.5086	103.113	103.093	102.959	98.4936	2.06033	6.51533	10	96.9874	106.232	97.8742	100.672	100.814	99.3315	107.405	113.14	96.2456	102.078	1.88823	5.66468	10	88.0315	89.2327	98.037	106.084	93.149	100.48	95.8356	2.84698	6.97365
11	100.601	101.886	107.488	105.132	103.909	94.1817	92.7824	91.5527	118.679	101.802	2.83488	8.50465	11	99.4433	107.807	103.18	107.579	98.0512	94.1817	99.1169	103.113	107.743	97.3936	101.761	1.53724	4.86118	11	96.9696	99.1501	103.45	99.5789	101.24	94.1817	104.444	94.2832	104.315	99.7349	1.33231	3.99692	11	110.039	107.079	107.028	107.843	98.5271	95.2707	104.298	2.41876	5.92472
12	98.6671	99.1335	108.329	110.58	92.653	88.2663	115.14	110.527	72.0553	99.4834	4.55525	13.6658	12	107.335	110.972	108.329	110.58	98.9692	88.2663	93.9002	89.2327	103.021	97.3936	100.8	2.70164	8.54333	12	103.03	111.995	94.4634	96.7172	100.814	88.2663	105.632	113.14	91.4447	100.611	2.90363	8.71088	12	95.3674	98.156	98.4154	113.431	99.4495	89.287	99.0177	3.25083	7.96288
13	100.979	96.995	96.0952	100.774	102.747	93.0213	90.5467	94.0958	93.2481	96.5003	1.40271	4.20812	13	88.4667	87.1198	96.0952	102.457	97.4446	93.0213	91.2919	102.134	117.187	109.916	98.5134	3.03211	9.58839	13	96.9696	106.232	103.232	100.052	102.959	93.0213	102.002	94.2832	110.749	101.056	1.89344	5.68033	13	110.039	89.2327	95.6837	103.372	97.9176	94.0969	98.3904	3.00202	7.35342
14	95.8005	83.4273	97.0534	92.699	94.3159	99.1228	103.961	93.7508	110.203	96.7037	2.49554	7.48662	14	110.243	77.2232	97.0534	92.699	97.4724	105.707	99.3433	103.113	98.4429	89.0455	97.0343	2.92354	9.24505	14	103.03	105.885	100.616	100.376	96.7405	106.129	86.4368	94.2832	85.3127	97.6455	2.56848	7.70543	14	95.3674	107.079	96.6378	95.0891	97.9455	100.269	98.7314	1.84059	4.50851
15	100.537	96.995	98.8385	92.5514	99.2645	104.402	90.5467	95.1112	122.522	100.085	3.13249	9.39748	15	102.228	88.6567	98.8385	102.457	92.699	104.402	106.942	93.1986	112.393	102.959	100.477	2.28087	7.21274	15	103.03	92.0677	106.196	98.7074	102.982	104.402	113.448	86.7405	117.184	102.751	3.17169	9.51506	15	88.0315	107.079	98.4154	94.9377	93.149	105.609	97.8703	3.01488	7.38493
16	99.7421	101.886	106.857	90.7074	94.3159	107.156	96.6538	93.7508	118.679	101.083	2.9086	8.7258	16	114.024	81.1863	106.857	90.7074	100.774	107.156	99.1169	93.1986	106.596	109.916	100.953	3.18952	10.0861	16	96.9696	106.232	98.2651	98.8784	100.892	107.156	102.448	113.14	91.4447	101.714	2.13987	6.4196	16	110.039	107.079	106.399	93.0461	99.4495	108.395	104.068	2.65639	6.50679
17	99.9478	100.549	97.1502	98.0512	99.2645	99.3315	98.2131	91.5527	93.2481	97.4787	1.02834	3.08503	17	88.4667	93.4696	103.18	98.0512	106.157	99.3315	96.5086	115.011	121.765	89.0455	101.099	3.41093	10.7863	17	101.212	92.0677	106.196	100.427	102.982	99.3315	88.0179	94.13	110.75	99.4572	2.36659	7.09978	17	95.3674	99.0778	96.7342	108.54	106.673	100.48	101.145	2.18167	5.34397
18	100.627	93.5731	97.4035	100.282	92.653	94.1817	103.961	110.527	93.2481	98.4952	2.00024	6.00073	18	102.228	86.8843	97.4035	99.6891	105.239	94.1817	96.5086	103.113	117.187	102.959	100.539	2.51274	7.94599	18	103.03	92.0677	97.1774	97.5923	102.999	106.129	107.405	90.5119	104.314	100.136	2.02663	6.07989	18	110.039	107.079	96.9865	102.868	90.3339	95.2707	100.43	3.07084	7.52199
19	101.031	95.3455	93.7318	105.812	103.678	88.2663	92.7824	93.7508	93.2481	96.4051	1.92723	5.78169	19	107.335	104.839	93.7318	105.812	107.993	105.707	104.334	89.2327	88.9266	100.176	100.809	2.35128	7.4354	19	96.9696	106.232	98.7387	101.393	101.777	88.2663	90.0383	116.251	110.749	101.157	3.02583	9.07749	19	88.0315	107.079	93.3305	95.1608	108.517	89.287	96.9011	3.60996	8.84257
20	100.462	101.886	94.0865	92.7689	102.747	93.0213	92.7824	95.1112	110.203	98.1187	2.02592	6.07776	20	88.4667	77.8136	94.0865	92.7689	103.862	93.0213	99.1169	93.1986	121.981	100.176	96.4492	3.62138	11.4518	20	96.9874	99.1501	106.196	97.5923	102.959	93.0213	86.4368	113.14	91.4447	98.5475	2.69327	8.07981	20	80.6955	116.002	98.4154	95.1608	90.3339	94.0969	95.7842	4.74802	11.6302
Tetanus													Tetanus														Tetanus													Tetanus
1	258.309	412.23	302.809	332.371	220.301	280.226	255.747	258.807	424.764	305.063	23.8988	71.6963	1	242.117	295.664	259.091	313.47	300.231	448.681	258.309	232.707	234.546	214.195	279.901	21.3968	67.6625	1	294.118	223.146	233.142	254.778	289.464	251.841	345.382	236.122	227.825	261.758	13.4749	40.4248	1	316.913	258.775	353.961	301.234	374.358	380.241	330.914	19.2637	47.1862
2	246.309	410.312	304.439	327.434	265.39	298.852	230.235	254.538	342.206	297.746	18.8903	56.6708	2	235.67	284.96	215.819	301.697	288.457	435.688	246.309	300.929	256.098	205.125	277.075	20.6976	65.4515	2	353.736	223.146	238.47	245.668	270.44	243.231	349.972	221.263	234.019	264.438	17.1986	51.5958	2	316.913	330.161	361.656	350.235	365.898	375.23	350.016	9.15341	22.4212
3	253.031	395.231	304.118	326.984	251.718	277.172	233.633	236.89	395.031	297.09	21.1524	63.4571	3	229.126	289.012	203.378	295.81	282.57	400.432	253.031	315.879	239.024	214.195	272.246	18.4762	58.427	3	304.054	230.84	216.071	237.48	265.433	226.011	322.89	213.296	234.019	250.01	13.0841	39.2524	3	299.307	285.545	338.571	306.244	338.67	350.404	319.79	10.6805	26.1618
4	260.152	380.232	306.882	324.316	254.037	266.748	247.047	227.54	352.554	291.057	17.4716	52.4147	4	222.582	271.464	202.297	260.488	247.249	399.919	260.152	421.095	243.502	226.754	275.55	23.455	74.1712	4	333.863	253.924	225.855	232.993	251.235	247.536	308.725	228.743	227.825	256.744	12.8621	38.5862	4	281.701	339.084	349.318	317.235	338.67	351.203	329.535	10.7625	26.3626
5	247.875	398.213	327.097	314.664	246.112	262.635	212.393	226.91	378.039	290.437	22.3285	66.9855	5	231.159	272.185	200.133	331.131	217.891	357.838	247.875	449.133	201.238	219.079	272.766	25.9027	81.9115	5	313.99	223.146	216.071	220.232	232.235	236.774	318.725	218.833	230.922	245.659	13.5568	40.6704	5	293.438	285.545	284.708	317.438	352.284	320.132	308.924	10.7254	26.2718
6	245.081	380.232	328.405	314.512	245.236	259.542	243.693	224.107	301.581	282.488	17.1914	51.5743	6	237.703	278.452	194.724	242.828	229.588	296.927	245.081	356.942	238.184	233.731	255.416	14.2431	45.0408	6	373.609	238.535	209.451	217.36	231.235	245.384	324.548	212.128	224.727	252.997	19.0187	57.0561	6	299.307	276.621	330.876	331.235	355.591	315.247	318.146	11.2888	27.6517
7	228.629	363.214	321.062	316.301	250.113	262.524	255.99	222.25	365.298	287.265	18.4384	55.3153	7	227.093	263.551	214.196	201.62	238.38	339.568	228.629	333.898	220.27	233.731	250.094	15.3233	48.4566	7	353.736	246.229	200.803	221.357	227.436	243.231	327.588	203.371	224.727	249.831	18.0292	54.0875	7	287.569	294.468	307.792	374.574	348.293	325.204	322.984	13.669	33.482
8	241.643	341.643	328.405	316.76	253.084	247.129	214.63	224.565	327.069	277.214	16.7757	50.327	8	237.703	273.88	203.378	207.506	244.267	354.665	241.643	282.222	237.066	229.545	251.188	13.8916	43.9293	8	304.054	223.146	206.976	210.789	219.76	234.245	324.548	209.622	221.631	239.419	14.5197	43.5592	8	281.701	312.314	315.487	316.625	332.914	310.235	311.546	6.80921	16.6791
9	248.12	338.12	330.769	316.007	245.75	257.78	241.458	225.058	369.543	285.845	17.5395	52.6185	9	235.165	274.78	219.605	236.941	223.701	280.432	248.12	318.773	244.343	227.452	250.931	9.89463	31.2896	9	294.118	230.84	199.21	206.436	220.288	226.011	327.588	201.757	224.727	236.775	14.7484	44.2451	9	305.176	258.775	238.539	370.953	341.976	315.988	305.234	20.3235	49.7822
10	240.201	330.201	330.769	314.123	255.046	249.172	263.815	222.25	373.791	286.596	17.2487	51.746	10	237.703	280.908	215.819	236.941	233.701	260.757	240.201	270.756	242.662	228.847	244.829	6.31356	19.9652	10	304.054	200.061	207.996	205.662	211.114	235.509	327.588	210.655	215.435	235.341	15.6777	47.033	10	299.307	285.545	284.708	302.138	335.967	312.579	303.374	7.81334	19.1387
11	244.805	314.805	327.097	319.774	249.16	243.636	232.515	209.424	314.325	272.838	15.1272	45.3816	11	227.093	280.908	234.751	236.941	223.701	206.2	244.805	345.513	244.343	226.754	247.101	12.5305	39.625	11	304.054	215.451	208.405	190.789	216.89	237.285	321.378	211.07	218.533	235.984	15.1116	45.3349	11	305.176	294.468	292.402	307.571	335.967	287.827	303.902	7.12488	17.4523
12	244.743	318.059	322.37	311.746	243.274	248.402	259.344	212.857	263.353	269.35	12.9276	38.7828	12	237.703	279.53	229.342	225.167	211.928	197.952	244.743	315.39	232.865	229.545	240.416	10.7094	33.8661	12	353.736	200.061	198.459	196.9	210.198	239.814	318.326	200.996	215.435	237.103	19.4317	58.2951	12	287.569	267.698	317.013	303.949	331.883	293.03	300.19	9.25175	22.6621
13	244.007	314.007	327.592	312.048	248.151	240.875	268.287	205.991	280.344	271.256	13.5481	40.6443	13	237.703	270.203	240.16	207.506	224.267	260.757	244.007	314.652	238.127	216.986	245.437	9.7058	30.6925	13	304.054	192.367	200.075	193.88	195.97	247.536	300.244	202.633	206.143	226.989	15.2464	45.7393	13	275.832	267.698	330.876	329.302	331.368	291.243	304.387	12.0894	29.6129
14	248.059	318.059	327.35	305.519	241.789	249.572	219.101	209.424	318.573	270.827	15.4417	46.3251	14	237.703	270.203	217.983	189.846	226.606	288.681	248.059	318.712	243.502	229.545	247.084	11.7129	37.0393	14	294.118	192.367	225.855	194.137	198.952	256.146	318.326	197.774	218.533	232.912	15.5337	46.6012	14	299.307	276.621	300.097	323.869	338.67	276.377	302.49	10.2192	25.0318
15	245.649	315.649	317.897	304.012	250.832	242.713	229.162	209.424	271.849	265.243	13.111	39.333	15	226.831	263.551	219.605	307.583	214.344	321.673	245.649	316.297	232.588	229.545	257.767	13.2921	42.0333	15	274.245	223.146	190.878	196.909	191.394	243.231	313.437	193.318	215.435	226.888	14.3023	42.9068	15	275.832	294.468	307.792	229.541	328.83	275.557	285.337	13.8785	33.9952
16	249.593	319.593	327.35	304.142	234.894	234.092	243.693	202.385	314.325	270.008	15.4024	46.2073	16	231.159	268.644	232.587	136.864	223.624	296.927	249.593	350.311	239.024	226.056	245.479	17.4022	55.0305	16	304.055	200.061	195.089	184.593	187.697	237.285	327.479	197.583	221.631	228.386	17.5211	52.5634	16	305.176	276.621	277.013	361.898	326.903	290.487	306.35	13.5468	33.1828
17	245.173	315.173	327.35	302.799	241.256	248.556	276.111	202.558	246.363	267.26	13.6345	40.9035	17	212.416	260.791	236.373	260.488	247.249	214.448	245.173	315.82	231.747	221.172	244.568	9.61536	30.4064	17	313.99	215.451	199.243	191.399	188.408	234.184	320.397	201.79	209.241	230.456	17.0155	51.0464	17	293.438	276.621	300.097	223.869	338.67	276.435	284.855	15.3406	37.5767
18	245.403	325.671	326.295	293.099	243.218	240.148	287.29	192.258	314.325	274.19	15.4402	46.3206	18	204.984	248.329	236.914	248.715	235.475	288.681	245.403	316.051	228.949	211.404	246.491	10.595	33.5042	18	264.308	200.061	180.918	190.614	181.535	258.299	318.326	183.231	203.047	220.038	16.247	48.741	18	281.701	285.545	277.013	254.654	325.055	273.306	282.879	9.50446	23.2811
19	247.414	317.414	310.554	288.249	238.342	238.24	230.279	181.959	335.562	265.335	16.7408	50.2223	19	209.399	251.081	230.423	213.393	200.154	214.448	247.414	318.066	249.661	220.475	235.451	10.8097	34.1831	19	274.245	184.673	181.692	192.866	198.952	256.146	320.397	184.015	212.339	222.814	16.4594	49.3782	19	293.438	267.698	338.571	296.705	319.902	269.539	297.642	11.3661	27.8412
20	249.133	319.133	315.28	284.482	229.541	232.759	257.108	192.258	339.81	268.834	16.3319	48.9956	20	215.943	246.961	233.669	242.828	229.588	214.448	249.133	319.788	238.313	213.497	240.417	9.76937	30.8935	20	264.308	238.536	189.485	182.367	168.494	260.451	313.437	191.907	206.143	223.903	16.0373	48.1119	20	299.307	276.621	307.792	298.516	311.924	266.122	293.38	7.38684	18.094
21	246.693	316.693	310.391	279.632	236.38	227.25	230.279	202.385	335.562	265.029	15.6485	46.9455	21	209.399	238.817	216.36	213.393	200.154	269.9	246.693	317.343	252.459	213.497	237.802	11.3149	35.7807	21	284.181	223.145	178.118	180.577	176.561	253.994	327.588	180.395	199.949	222.723	18.2418	54.7253	21	264.094	276.621	300.097	361.898	326.631	264.62	298.994	15.9395	39.0437
22	244.621	320.207	302.409	279.139	243.938	234.958	245.93	192.258	305.829	263.254	13.7957	41.3872	22	215.943	241.623	222.31	213.393	200.154	214.448	244.621	315.267	226.151	219.079	231.299	10.2207	32.3208	22	224.563	184.672	171.73	182.717	169.169	253.994	318.326	173.926	196.851	208.438	16.6049	49.8146	22	293.438	249.852	284.708	303.949	325.055	264.61	286.935	11.0506	27.0684
23	247.936	317.936	292.955	282.187	245.18	237.968	257.108	195.692	365.298	271.362	16.6062	49.8186	23	208.187	242.143	221.228	248.715	235.475	294.646	247.936	318.589	227.269	212.102	245.629	11.2123	35.4563	23	234.499	238.536	174.229	179.119	168.552	256.146	313.437	176.457	199.949	215.658	16.3012	48.9035	23	305.176	285.545	292.402	173.949	322.416	271.411	275.15	21.4453	52.53
24	247.813	317.813	300.045	278.549	231.503	226.954	238.104	189.537	329.457	262.197	15.6205	46.8615	24	209.399	242.143	221.228	236.941	223.701	269.9	247.813	318.466	227.269	205.823	240.268	10.5461	33.3496	24	234.499	207.757	171.369	179.331	169.558	237.146	314.234	173.559	196.851	209.367	15.7112	47.1337	24	287.569	285.545	277.013	245.6	317.325	266.074	279.854	9.77633	23.947
25	245.143	325.671	292.955	283.269	236.088	233.124	230.279	195.692	326.738	263.217	15.291	45.873	25	209.399	248.491	219.064	207.506	194.267	294.646	245.143	315.79	228.949	203.032	236.629	12.7915	40.4502	25	264.308	223.145	173.45	177.5	163.52	235.298	313.437	175.667	199.949	214.03	16.7281	50.1842	25	275.832	276.621	300.097	247.411	319.484	260.664	280.018	10.689	26.1826
26	245.818	315.818	296.374	281.94	238.342	235.713	240.34	202.558	373.791	270.077	17.4406	52.3219	26	209.399	242.869	220.687	201.62	188.38	240.17	245.818	286.405	233.934	212.102	228.138	8.85105	27.9895	26	244.436	223.145	170.905	175.299	167.856	234.614	313.437	173.09	199.949	211.415	16.0804	48.2413	26	281.701	240.928	277.013	261.898	323.899	263.391	274.805	11.4122	27.9541
27	250.207	320.207	298.737	282.399	237.389	225.407	248.165	192.258	314.325	263.233	14.442	43.3261	27	215.943	246.195	203.919	189.846	176.606	268.502	250.207	270.762	209.584	209.311	224.088	10.3553	32.7463	27	194.754	207.756	169.234	179.273	166.199	235.691	318.326	171.398	193.755	204.043	16.0689	48.2068	27	258.226	285.545	315.487	249.621	325.055	264.104	283.006	12.8004	31.3544
28	250.038	320.038	301.354	279.549	225.617	226.147	217.982	185.392	288.84	254.995	14.9362	44.8086	28	209.399	251.503	232.046	207.506	194.267	260.254	250.038	315.79	208.744	203.73	233.328	11.7292	37.091	28	224.563	192.367	176.653	178.254	161.569	236.397	320.397	178.911	190.657	206.641	16.2924	48.8771	28	281.701	276.621	253.928	280.407	336.823	268.246	282.954	11.5597	28.3154
29	251.711	321.711	286.92	273.885	231.503	232.28	240.34	202.558	293.088	259.333	12.4454	37.3361	29	209.399	263.551	222.31	201.62	188.38	268.502	251.711	322.372	209.584	208.614	234.604	13.0365	41.2249	29	244.436	207.756	175.462	172.004	163.495	235.644	320.397	177.706	190.657	209.728	16.7711	50.3134	29	311.045	276.621	307.792	227.491	338.67	252.213	285.639	16.8605	41.2996
30	253.138	323.138	300.045	277.579	242.265	231.175	250.401	188.825	297.336	262.656	13.7336	41.2008	30	209.399	252.847	213.655	207.506	194.267	241.475	253.138	323.802	210.702	204.427	231.122	12.2366	38.6955	30	224.563	215.451	170.845	171.415	157.245	230.451	313.437	173.029	181.365	204.2	16.2653	48.796	30	299.307	276.621	292.402	251.033	322.984	252.45	282.466	11.4705	28.097
31	252.187	322.187	296.627	274.669	235.427	230.139	266.051	205.991	246.363	258.849	11.8487	35.546	31	215.943	235.491	208.787	178.072	164.833	233.227	252.187	322.849	231.976	200.939	224.43	13.8575	43.8214	31	224.563	215.451	170.149	176.701	163.413	231.715	317.436	172.324	190.657	206.934	16.1727	48.5182	31	281.701	267.698	292.402	360.087	331.883	256.316	298.348	16.2838	39.8871
32	253.906	323.906	297.935	272.565	231.503	226.389	226.925	205.991	297.336	259.606	13.4698	40.4094	32	202.855	246.195	220.687	189.846	176.606	241.475	253.906	315.79	194.19	200.939	224.249	13.0845	41.3767	32	164.324	184.672	167.768	165.25	157.656	231.339	290.397	169.913	181.365	190.298	14.4848	43.4543	32	287.569	267.698	284.708	285.839	331.368	256.486	285.611	10.4363	25.5636
33	251.634	321.634	290.845	278.549	231.503	233.471	220.219	188.825	293.088	256.641	14.1037	42.3111	33	218.42	246.961	240.16	160.411	147.172	268.97	251.634	322.295	216.86	202.334	227.522	16.1966	51.2182	33	204.69	207.756	168.823	156.958	150.422	243.366	294.561	170.981	184.462	198.002	15.4716	46.4148	33	281.701	276.621	292.402	280.407	338.67	244.673	285.746	12.4638	30.5299
34	254.689	324.689	281.793	273.885	247.198	227.677	241.458	192.258	242.115	253.974	12.3687	37.1062	34	219.43	235.491	226.096	189.846	176.606	242.873	254.689	325.355	231.136	202.334	230.386	13.0185	41.1683	34	176.868	207.756	171.588	160.324	153.822	225.519	287.479	173.782	178.267	192.823	13.9985	41.9954	34	287.569	303.391	261.623	285.839	329	250.957	286.397	11.5112	28.1966
35	250.054	320.054	274.049	288.249	233.465	231.121	258.225	185.392	293.088	259.3	13.3847	40.1541	35	210.988	246.961	209.869	160.411	147.172	274.357	250.054	320.711	201.467	206.52	222.851	16.4012	51.8651	35	174.26	192.367	163.129	159.93	154.461	239.959	267.479	165.214	178.267	188.341	13.1068	39.3203	35	269.963	294.468	338.571	338.356	328.439	248.219	303.003	15.6287	38.2825
36	248.626	324.689	281.139	264.372	231.61	226.186	258.225	195.692	267.601	255.349	12.2083	36.6249	36	213.465	243.006	232.046	178.072	164.833	307.349	248.626	319.281	205.945	200.939	231.356	16.0193	50.6575	36	172.893	192.367	163.644	160.128	154.608	218.434	274.561	165.736	175.17	186.394	12.7956	38.3869	36	252.357	294.468	284.74	294.894	328.263	251.359	284.347	11.908	29.1686
37	251.803	321.803	283.502	266.312	243.274	227.236	240.522	195.692	310.077	260.025	13.3619	40.0857	37	217.532	235.491	232.046	166.298	153.059	282.603	251.803	322.464	232.57	206.52	230.039	15.8176	50.0195	37	184.196	207.756	164.139	158.244	152.706	210.586	284.561	166.237	175.17	189.288	13.7248	41.1745	37	275.832	285.545	284.708	260.487	316.431	251.121	279.02	9.3211	22.8319
38	248.212	318.212	275.104	261.089	238.342	224.246	241.458	199.125	352.554	262.038	15.8477	47.5432	38	212.816	235.491	204.46	254.602	141.362	254.178	248.212	318.866	207.507	202.334	227.983	14.7134	46.5279	38	198.728	200.061	173.469	157.413	149.069	214.891	274.561	175.686	175.17	191.006	12.5686	37.7057	38	281.701	312.314	200.065	291.272	320.902	252.739	276.499	18.1717	44.5114
39	247.813	317.813	277.72	276.237	244.227	218.332	241.458	203.508	254.196	253.478	11.3282	33.9846	39	222.486	233.076	206.083	201.62	188.38	218.902	247.813	318.466	188.983	195.357	222.117	12.3393	39.0204	39	168.919	207.756	172.778	156.909	148.394	223.366	277.479	174.987	178.267	189.873	13.4428	40.3285	39	281.701	312.314	315.487	247.81	316.595	244.487	286.399	13.7808	33.7559
40	247.936	317.936	272.74	271.759	233.941	224.767	272.758	201.025	328.263	263.458	13.9025	41.7074	40	213.465	239.543	231.505	207.506	194.267	254.178	247.936	318.589	221.339	202.334	233.066	11.3774	35.9786	40	208.665	215.451	160.242	162.92	148.67	228.434	264.561	162.29	172.073	191.478	13.1388	39.4164	40	275.832	294.468	338.571	274.974	320.37	245.369	291.597	13.7896	33.7774
41	249.731	319.731	281.139	259.522	248.281	220.847	252.636	188.825	261.495	253.579	12.1002	36.3005	41	211.755	239.543	221.769	207.506	159.511	200.124	249.731	320.388	205.945	196.753	221.303	13.4766	42.6169	41	158.983	215.451	159.774	157.803	147.395	217.806	284.561	161.816	165.878	185.496	15.0388	45.1164	41	281.701	285.545	315.487	289.461	325	250.55	291.291	10.8165	26.4949
42	251.447	321.447	257.252	258.179	225.617	212.458	252.636	190.676	261.495	247.912	12.2754	36.8262	42	216.406	235.491	220.146	219.28	166.041	272.956	251.447	322.107	196.989	194.659	229.552	14.0013	44.2761	42	172.893	200.061	163.769	142.867	150.831	225.026	284.561	165.863	162.781	185.406	14.9721	44.9164	42	269.963	285.545	330.876	245.6	319.602	259.673	285.21	13.8105	33.8287
43	253.66	323.66	257.505	264.372	245.236	217.162	288.408	195.692	305.829	261.28	13.5397	40.6192	43	213.465	232.931	232.046	248.715	185.475	227.151	253.66	318.589	219.87	203.73	233.563	11.402	36.0564	43	158.983	200.061	165.266	155.322	145.231	233.636	264.561	167.378	159.683	183.347	13.631	40.8929	43	264.094	312.314	284.708	313.003	323.569	243.362	290.175	12.9459	31.711
44	247.69	324.689	259.869	263.029	233.465	218.296	251.519	185.392	293.088	253.004	13.479	40.4371	44	215.055	247.803	234.751	225.167	181.928	280.322	247.69	318.343	221.879	193.264	236.62	12.7035	40.1719	44	170.906	207.756	159.354	141.635	142.658	207.806	264.25	161.391	159.683	179.493	13.3196	39.9587	44	264.094	285.545	269.318	302.138	319.484	257.653	283.039	9.81646	24.0453
45	251.616	321.616	270.377	272.729	239.35	213.361	249.282	178.526	259.106	250.663	13.2849	39.8548	45	215.943	235.491	226.637	201.62	188.38	255.576	251.616	322.277	214.902	206.52	231.896	12.0906	38.2337	45	178.855	200.062	162.346	146.67	145.756	235.789	234.758	164.422	165.878	181.615	11.5039	34.5116	45	269.963	312.314	323.182	271.352	326.291	248.811	291.986	13.3393	32.6744
46	250.238	320.238	262.232	256.612	245.236	223.236	269.404	195.692	242.115	251.667	11.3216	33.9648	46	211.26	239.543	212.574	183.959	170.719	280.322	250.238	320.896	210.424	193.962	227.39	14.605	46.1851	46	180.843	215.451	165.092	138.897	146.314	216.416	221.643	167.203	162.781	179.404	10.4225	31.2675	46	275.832	312.314	292.402	256.865	306.288	238.483	280.364	11.7821	28.86
47	254.167	324.167	257.505	248.852	229.541	220.322	262.697	185.392	178.401	240.116	14.6523	43.957	47	215.943	235.491	226.096	225.167	177.172	225.846	254.167	324.833	218.541	196.753	230.001	12.4224	39.283	47	181.463	207.756	165.266	142.813	149.772	233.545	234.561	151.359	165.878	181.379	11.8631	35.5893	47	269.963	321.238	353.961	274.974	315.915	244.792	296.807	16.4635	40.3271
48	254.689	324.689	266.959	248.852	253.084	213.492	261.579	195.692	261.495	253.392	11.9859	35.9578	48	213.465	248.795	222.31	236.941	183.701	254.178	254.689	325.355	201.467	193.962	233.486	12.9767	41.036	48	178.855	215.451	154.118	144.924	152.008	223.635	234.561	156.088	159.683	179.925	11.6709	35.0128	48	275.832	276.621	284.708	240.567	328.83	242.274	274.805	13.2308	32.4086
49	253.445	323.445	266.959	245.569	237.389	217.745	261.579	178.526	242.115	247.419	12.9945	38.9835	49	210.988	246.195	233.669	178.072	164.833	245.929	253.445	318.589	212.215	214.195	227.813	13.6423	43.1408	49	172.893	200.062	159.172	130.891	144.792	213.5	170.397	161.207	156.586	167.722	8.57752	25.7325	49	264.094	303.391	307.792	285.839	327.496	256.831	290.908	11.0838	27.1496
50	254.903	324.903	265.65	252.584	255.046	214.978	221.336	188.825	181.836	240.007	14.6486	43.9457	50	213.465	238.011	221.769	154.525	181.285	254.178	254.903	325.571	207.626	193.962	224.529	15.0235	47.5086	50	178.855	215.451	157.639	137.559	146.406	218.478	260.349	159.654	150.392	180.531	13.9007	41.702	50	275.832	285.545	323.182	271.352	333.516	237.803	287.872	14.4456	35.3845
51	250.514	320.514	265.904	255.642	249.16	214.922	238.104	192.258	197.451	242.719	13.0428	39.1285	51	215.943	243.623	196.888	266.375	153.136	227.151	250.514	321.172	228.615	198.148	230.156	14.325	45.2996	51	141.097	200.061	152.946	133.869	147.392	211.079	170.397	154.901	153.489	162.803	8.79442	26.3833	51	264.094	294.468	277.013	255.054	324.463	246.665	276.959	11.7278	28.7271
52	254.735	324.735	261.177	255.269	243.274	221.327	241.458	195.692	184.083	242.417	13.6817	41.0451	52	217.532	246.195	207.165	183.959	170.719	218.902	254.735	325.402	217.701	199.543	224.185	13.8043	43.6531	52	168.919	200.062	155.313	128.195	154.225	216.191	221.643	157.299	147.294	172.127	10.8997	32.6992	52	281.701	294.468	323.182	202.537	325.439	247.451	279.13	19.3192	47.3222
53	254.09	324.09	259.869	257.209	227.579	211.472	253.754	192.258	208.999	243.258	13.0505	39.1515	53	209.399	246.195	203.919	178.072	234.833	227.151	254.09	322.277	210.437	212.8	229.917	12.4136	39.2551	53	172.893	169.283	158.28	138.837	148.67	218.703	140.397	160.304	147.294	161.629	8.16458	24.4937	53	269.963	321.238	230.844	262.298	323.689	249.112	276.191	15.6062	38.2273
54	255.763	325.763	261.177	246.764	235.427	212.288	253.754	195.692	203.225	243.317	13.0664	39.1992	54	202.855	235.491	223.392	213.393	200.154	254.646	255.763	326.432	212.104	198.148	232.238	12.3972	39.2035	54	178.855	200.062	160.129	122.42	147.395	213.545	141.643	162.176	144.197	163.38	9.78049	29.3415	54	264.094	276.621	323.182	258.676	333.516	247.452	283.923	14.6228	35.8183
55	255.379	325.379	270.63	255.269	251.122	219.729	228.044	188.825	201.699	244.009	13.5996	40.7987	55	202.855	239.992	220.146	236.941	223.701	228.549	255.379	312.96	216.86	202.334	233.972	10.182	32.1982	55	149.667	207.756	155.041	133.093	150.831	218.568	127.479	157.023	144.197	160.406	10.5178	31.5535	55	264.094	294.468	284.708	264.109	323.116	242.25	278.791	11.5648	28.3277
56	255.671	325.671	267.212	253.329	246.278	210.33	273.876	199.129	230.237	251.304	12.4646	37.3937	56	202.855	242.877	244.487	201.62	188.38	225.846	255.671	322.277	204.828	201.636	229.048	12.5921	39.8197	56	153.021	215.451	154.278	124.912	145.231	213.635	127.479	156.25	147.294	159.728	11.0017	33.0052	56	275.832	303.391	292.402	300.327	323.689	247.683	290.554	10.6713	26.1393
57	251.849	313.224	269.575	229.079	239.35	214.762	254.873	188.825	243.844	245.042	11.6426	34.9277	57	222.486	233.205	200.674	238.638	175.398	227.151	243.224	320.896	203.988	200.241	226.59	12.4158	39.2622	57	139.11	200.061	160.955	128.309	142.658	211.124	120.397	163.013	147.294	156.991	10.2865	30.8594	57	252.357	303.391	307.792	274.974	317.533	245.009	283.509	12.4742	30.5553
58	252.202	312.319	268.014	230.422	244.276	214.992	244.811	189.775	283.929	248.971	12.1622	36.4867	58	210.988	235.491	245.028	201.62	188.38	256.74	242.319	312.96	229.178	203.032	232.574	11.3363	35.8484	58	172.893	207.756	156.373	121.861	145.756	213.635	127.479	158.372	141.1	160.581	10.8068	32.4205	58	246.488	276.621	338.571	284.029	319.484	238.428	283.937	16.0992	39.4348
59	254.996	324.996	269.322	229.079	244.276	222.543	249.282	199.125	283.929	253.061	12.3055	36.9166	59	207.81	236.011	208.787	219.28	165.398	254.178	254.996	320.896	188.032	190.473	224.586	14.051	44.4332	59	168.919	200.061	162.729	117.856	146.314	216.056	127.479	164.809	141.1	160.591	10.693	32.0791	59	269.963	285.545	284.708	303.949	319.484	241.689	284.223	11.0257	27.0072
60	250.192	320.192	257.505	230.274	239.35	209.829	269.404	205.991	230.237	245.886	11.5777	34.7331	60	214.401	246.926	216.901	213.393	180.154	281.205	250.192	312.96	225.817	196.055	233.8	12.6487	39.9988	60	173.514	192.367	162.756	122.858	149.772	216.101	120.397	164.837	144.197	160.755	10.3453	31.0359	60	281.701	303.391	269.35	300.327	315.915	226.823	282.918	13.0936	32.0727
61	253.921	323.921	258.56	229.079	247.279	215.621	252.636	188.825	230.237	244.453	12.3845	37.1534	61	215.943	246.195	223.933	219.28	186.041	218.902	253.921	324.586	214.902	191.171	229.488	12.4361	39.3263	61	147.059	176.977	150.484	119.557	152.008	226.011	140.397	152.408	141.1	156.222	10.0513	30.1538	61	281.701	294.468	315.487	222.457	316.689	236.265	277.844	16.3438	40.034
62	253.967	323.967	261.177	244.599	257.007	212.903	239.222	196.002	220.546	245.488	12.2375	36.7126	62	209.399	249.001	221.769	219.28	206.041	248.772	253.967	324.633	223.019	201.636	235.752	11.5213	36.4337	62	139.11	215.451	152.27	117.809	144.792	205.922	170.397	154.217	138.002	159.774	10.7472	32.2415	62	234.751	285.545	307.792	227.89	338.67	235.008	271.609	18.8061	46.0654
63	251.849	317.521	265.904	232.587	251.122	216.27	250.401	205.991	213.246	244.988	11.377	34.1309	63	202.855	254.765	233.669	148.638	195.398	254.646	247.521	318.174	224.137	200.939	228.074	14.419	45.5967	63	156.995	192.367	151.944	117.224	146.406	223.5	170.397	153.886	147.294	162.224	10.159	30.4771	63	269.963	267.698	307.792	255.054	319.484	234.991	275.83	13.0733	32.0228
64	251.849	313.654	259.869	242.659	262.893	220.021	260.462	195.692	181.836	243.215	13.209	39.627	64	202.855	256.899	210.951	219.28	186.041	255.576	243.654	318.174	217.701	195.357	230.649	12.3976	39.2045	64	164.944	207.756	144.252	119.686	146.314	193.365	140.397	146.096	138.002	155.646	9.40581	28.2174	64	258.226	294.468	277.013	253.243	318.771	236.569	273.048	12.258	30.0259
65	251.849	313.654	267.212	235.869	251.122	211.45	263.815	209.424	184.083	243.164	12.8021	38.4062	65	209.399	267.604	234.21	213.393	200.154	235.259	243.654	312.96	213.222	196.753	232.661	11.272	35.6453	65	153.021	176.977	147.655	123.742	149.772	195.877	170.397	149.543	141.1	156.454	7.12703	21.3811	65	281.701	267.698	300.097	207.97	319.902	230.565	267.989	17.2403	42.2299
66	251.849	312.994	258.814	229.677	245.236	209.274	231.397	199.125	184.083	235.828	12.7014	38.1042	66	215.943	265.838	254.764	160.411	187.172	227.011	242.994	313.637	223.019	190.473	228.126	13.9526	44.1221	66	143.084	200.062	154.713	118.486	140.496	203.41	120.397	156.691	138.002	152.816	10.2103	30.631	66	264.094	294.468	284.708	218.836	338.67	227.189	271.327	18.2624	44.7335
67	251.849	311.889	254.087	239.377	253.084	218.353	257.108	199.125	168.049	239.213	13.582	40.7461	67	209.399	267.604	248.273	201.62	188.38	235.259	241.889	310.269	213.16	189.776	230.563	12.12	38.3268	67	129.173	223.145	149.208	116.941	137.434	188.343	120.396	151.116	141.1	150.762	11.4608	34.3824	67	264.094	303.391	292.402	245.999	330.706	236.248	278.807	14.8176	36.2955
68	255.763	309.633	244.38	233.782	252.131	218.353	255.99	192.258	197.451	239.971	11.8533	35.56	68	202.855	264.564	253.141	202.828	229.588	208.232	239.633	280.807	231.136	198.148	231.093	9.04151	28.5918	68	158.983	207.756	152.194	127.499	145.606	188.343	170.397	154.14	134.905	159.98	8.48336	25.4501	68	258.226	276.621	245.487	249.621	325.055	240.854	265.977	12.8869	31.5664
69	248.811	312.319	251.724	234.302	255.046	211.667	249.282	199.125	155.305	235.287	14.5473	43.6418	69	209.399	267.604	265.041	202.262	199.023	199.984	242.319	312.96	202.245	195.357	229.619	12.7799	40.4137	69	138.489	176.977	137.387	117.778	139.103	195.877	153.314	139.144	134.905	148.108	7.99784	23.9935	69	264.094	294.468	307.792	227.89	325.055	220.79	273.348	17.5314	42.9431
70	252.202	323.967	242.017	231.617	257.007	211.546	233.633	199.125	154.313	233.936	15.4089	46.2267	70	215.943	256.899	255.846	142.751	189.511	208.232	246.601	280.807	213.16	189.078	219.883	12.9556	40.9693	70	158.983	184.672	141.854	121.328	145.366	205.922	170.397	143.667	131.808	156	8.96219	26.8866	70	234.751	276.621	300.097	264.109	330.209	235.818	273.601	15.2126	37.263
71	255.763	313.654	254.087	240.944	246.355	215.621	243.693	192.258	175.882	237.584	13.364	40.092	71	209.399	267.604	235.832	107.43	194.19	235.727	250.545	280.807	202.307	188.38	217.222	15.6634	49.5322	71	149.046	192.367	147.801	110.976	138.051	198.388	113.315	149.69	138.002	148.626	10.0558	30.1674	71	264.094	294.468	353.961	247.81	311.441	225.89	282.944	19.0028	46.547
72	251.849	313.654	249.107	230.049	248.207	208.466	234.751	192.258	163.139	232.387	14.192	42.576	72	215.943	261.846	250.978	207.506	194.267	209.63	251.849	250.145	242.891	190.473	227.553	8.43372	26.6698	72	178.855	176.978	151.932	107.868	134.968	175.787	106.232	153.875	131.808	146.478	9.41342	28.2403	72	258.226	285.545	300.097	236.945	316.433	230.579	271.304	14.2345	34.8672
73	252.985	322.985	250.415	242.287	258.44	219.142	241.458	190.676	181.656	240.005	13.8358	41.5075	73	212.33	268.705	254.223	207.506	194.267	206.927	252.985	203.402	233.934	201.636	223.592	8.40457	26.5776	73	198.728	192.367	138.332	113.528	139.237	178.298	120.396	140.1	131.808	150.31	10.4462	31.3386	73	246.488	267.698	300.097	249.621	319.484	232.973	269.394	13.7801	33.7541
74	252.202	322.801	244.634	233.557	227.579	212.903	251.519	199.125	201.699	238.446	12.475	37.4251	74	209.399	263.806	269.368	213.393	200.154	208.232	252.801	223.258	225.54	196.753	226.27	8.37261	26.4765	74	158.983	192.367	147.885	114.274	138.328	165.742	106.232	149.776	131.807	145.044	8.79241	26.3772	74	223.013	303.391	267.792	273.163	325.055	229.393	270.301	16.3474	40.0428
75	248.811	312.319	244.38	243.629	235.427	205.618	250.401	195.692	243.844	242.236	10.919	32.7571	75	209.399	263.758	252.6	236.941	223.701	237.821	253.2	160.452	223.019	203.73	226.462	9.55259	30.2079	75	198.107	200.062	143.293	109.449	147.141	193.365	153.314	145.125	134.905	158.307	10.5674	31.7021	75	269.963	303.391	230.097	227.89	333.399	227.657	265.4	18.4082	45.0907
76	248.811	313.654	251.724	235.497	251.122	209.503	248.165	199.125	181.656	237.695	12.8061	38.4182	76	209.399	268.705	255.305	160.411	197.172	235.259	248.811	169.157	224.137	198.846	216.72	11.4542	36.2213	76	168.919	184.672	147.366	111.399	140.388	183.32	140.397	149.25	138.002	151.524	7.88412	23.6524	76	246.488	294.468	277.013	222.457	330.152	221.963	265.423	17.57	43.0374
77	251.849	302.876	250.415	244.599	246.245	216.952	229.162	202.558	246.071	243.414	9.31324	27.9397	77	215.943	259.706	261.796	201.62	188.38	235.259	251.849	180.602	226.657	205.125	222.694	9.23158	29.1928	77	139.731	215.451	140.67	108.309	137.987	193.365	170.397	142.468	122.516	152.322	11.4376	34.3127	77	275.832	294.468	238.571	226.079	320.846	226.645	263.74	16.1031	39.4444
78	251.281	313.654	249.36	244.599	239.35	217.57	258.225	190.726	175.882	237.85	13.4341	40.3022	78	202.855	274.462	252.6	202.262	209.023	227.011	251.281	171.633	229.456	199.543	222.013	9.7709	30.8983	78	158.362	200.061	136.104	114.082	140.718	190.854	153.314	137.844	128.71	151.117	9.43931	28.3179	78	252.357	312.314	217.792	238.756	330.152	235.853	264.537	18.6269	45.6264
79	251.558	309.176	259.869	236.839	239.883	216.048	257.108	199.125	201.699	241.256	11.3735	34.1205	79	201.266	263.806	231.505	214.036	210.796	229.853	251.558	272.115	225.54	189.776	229.025	8.473	26.794	79	178.855	223.145	143.272	111.103	141.632	190.539	170.397	145.104	131.808	159.54	11.43	34.29	79	258.226	285.545	215.487	253.243	329.014	236.531	263.007	16.2709	39.8554
80	253.706	322.876	256.45	243.257	244.283	216.141	253.754	181.959	163.139	237.285	15.5118	46.5355	80	196.311	263.758	251.518	219.28	206.041	235.727	253.706	290.719	195.308	186.985	229.935	10.9351	34.5798	80	158.983	215.451	132.736	108.606	142.968	187.391	140.397	134.433	131.807	150.308	10.8578	32.5734	80	258.226	276.621	205.487	222.457	325.055	238.066	254.319	17.4931	42.8491
81	248.811	309.176	249.36	243.257	239.35	210.778	240.34	183.491	153.118	230.853	14.8158	44.4474	81	211.876	274.462	253.682	212.262	209.023	236.657	239.633	189.565	222.179	190.473	223.981	8.59859	27.1911	81	138.489	215.451	140.485	101.664	135.4	175.472	153.314	142.281	134.905	148.607	10.5318	31.5955	81	252.357	258.775	227.013	249.621	325.055	221.69	255.752	15.1078	37.0064
82	251.312	291.312	268.267	236.467	247.279	213.532	266.051	171.659	170.194	235.119	14.1095	42.3284	82	205.332	267.81	235.832	172.185	188.946	208.092	251.312	201.726	233.094	186.287	215.062	9.73115	30.7726	82	178.855	192.367	147.232	113.785	136.378	183.553	92.0683	149.114	138.002	147.928	11.0053	33.0158	82	269.963	249.852	303.532	231.512	319.902	233.239	268	15.0878	36.9573
83	248.811	288.811	264.595	229.304	257.007	214.983	243.693	181.959	158.891	232.006	13.6831	41.0494	83	207.151	275.564	254.223	219.28	206.041	237.961	239.633	199.219	219.381	193.962	225.241	8.27487	26.1675	83	99.3641	207.757	142.07	110.149	137.836	172.593	92.0677	143.886	122.516	136.471	12.1968	36.5905	83	264.094	267.698	300.358	236.945	319.484	230.667	269.874	14.2011	34.7854
84	252.202	292.202	260.122	218.409	251.122	213.809	249.282	180.058	201.367	235.397	11.5083	34.5248	84	211.876	274.462	248.814	219.28	206.041	243.835	252.202	190.513	198.669	192.566	223.826	9.18545	29.0469	84	109.3	184.672	138.72	109.184	134.074	156.701	99.1496	140.493	125.613	133.101	8.85919	26.5776	84	264.094	267.698	292.664	193.483	319.484	230.135	261.26	18.2467	44.6951
85	248.811	313.654	263.54	226.169	242.321	213.058	242.576	178.526	191.432	235.565	13.4096	40.2287	85	211.876	274.462	248.814	242.828	199.588	244.765	247.69	208.117	217.701	193.264	228.91	8.33165	26.347	85	139.11	192.367	136.97	107.131	132.086	150.674	99.1501	138.721	128.71	136.102	8.87435	26.6231	85	275.832	249.852	277.013	262.298	316.946	224.416	267.726	12.6482	30.9816
86	250.744	290.744	268.267	226.169	240.836	207.917	226.925	180.058	218.359	234.447	10.9706	32.9119	86	216.473	267.81	255.846	160.411	197.172	224.448	250.744	221.198	203.147	199.543	219.679	10.1778	32.1851	86	139.11	161.588	145.55	106.149	138.355	174.782	99.1501	147.411	113.224	136.147	8.46807	25.4042	86	252.357	285.545	264.797	284.029	316.595	223.166	271.081	13.0822	32.0446
87	253.415	309.176	264.849	223.259	245.236	215.468	244.811	175.092	201.367	236.964	12.984	38.9519	87	222.486	273.605	225.318	205.81	182.57	216.2	247.69	213.853	219.381	191.869	219.878	8.24679	26.0786	87	158.983	207.756	134.787	105.805	133.014	156.701	99.1496	136.511	128.71	140.157	10.7261	32.1784	87	246.488	276.621	284.708	175.374	338.67	227.567	258.238	22.6959	55.5934
88	250.959	290.959	260.156	219.977	253.084	218.271	253.754	179.438	184.378	234.553	12.2765	36.8294	88	215.943	274.462	255.846	219.28	206.041	224.448	250.959	200.534	215.743	193.264	225.652	8.32235	26.3176	88	149.046	207.756	136.299	96.8419	139.272	174.782	106.232	138.042	122.516	141.199	11.3016	33.9047	88	269.963	285.545	292.402	227.89	330.209	236.018	273.671	15.5089	37.989
89	248.811	309.176	255.395	224.827	251.284	213.344	277.23	181.959	201.367	240.377	13.1309	39.3926	89	222.486	261.012	235.832	219.203	205.964	237.421	251.281	233.079	220.221	203.032	228.953	5.84608	18.4869	89	138.489	192.367	135.464	103.49	132.039	168.755	120.396	137.196	134.905	140.345	8.66464	25.9939	89	281.701	267.698	265.058	226.079	313.707	224.135	263.063	13.9294	34.1198
90	252.678	302.876	249.36	227.139	255.046	220.183	290.644	178.75	201.367	242.005	13.312	39.9359	90	218.42	256.899	250.978	142.751	199.511	259.173	252.678	223.135	221.061	190.473	221.508	11.6301	36.7776	90	129.173	192.367	139.804	104.045	133.873	174.782	120.396	141.591	125.613	140.183	9.12352	27.3706	90	281.701	276.621	257.364	285.839	327.086	227.649	276.043	13.4469	32.938
91	253.63	293.63	242.27	226.767	257.007	213.464	282.819	179.476	171.635	235.633	14.0606	42.1818	91	215.943	278.308	254.223	178.072	194.267	197.421	251.281	171.633	219.381	190.473	215.1	11.2879	35.6954	91	149.046	192.367	140.14	107.3	131.603	159.715	106.232	141.931	122.516	138.983	8.96987	26.9096	91	234.751	276.621	300.097	231.512	338.67	226.905	268.093	18.4612	45.2204
92	253.63	302.876	243.325	227.884	231.503	224.524	266.051	181.959	180.13	234.653	12.901	38.703	92	209.399	289.012	269.368	178.072	194.833	224.916	253.63	173.986	205.945	199.543	219.87	12.289	38.8613	92	139.11	207.756	129.286	108.95	136.524	198.388	92.0677	130.938	125.613	140.959	12.7313	38.1938	92	269.963	240.928	353.961	242.377	325.055	231.77	277.342	20.6775	50.6493
93	249.464	289.464	240.962	223.632	237.921	212.676	267.168	171.659	163.139	228.454	13.7802	41.3407	93	218.42	263.551	252.6	284.036	200.796	198.819	249.464	169.812	221.061	191.869	225.043	11.4529	36.2172	93	119.237	192.367	133.974	93.4621	129.543	175.787	92.0683	135.686	116.321	132.049	11.2258	33.6775	93	258.226	258.775	259.754	197.105	328.362	226.17	254.732	17.8996	43.8448
94	252.801	292.801	255.395	228.482	247.437	215.713	279.465	181.008	226.855	242.217	11.2624	33.7873	94	207.81	260.828	255.305	215.81	202.57	223.143	247.69	273.361	215.743	193.264	229.552	8.71003	27.5435	94	168.919	192.367	140.973	89.0163	131.432	178.298	120.396	142.775	116.321	142.277	10.945	32.8349	94	281.701	267.698	254.712	222.457	316.595	219.129	260.382	15.0999	36.9869
95	252.801	288.811	250.669	217.439	227.579	210.498	258.225	181.959	243.844	236.869	10.4225	31.2676	95	215.682	265.004	261.796	207.506	204.267	197.421	251.281	173.156	240.093	203.032	221.924	9.73644	30.7893	95	129.794	192.367	143.013	100.409	137.675	165.742	120.396	144.841	122.516	139.639	8.97786	26.9336	95	264.094	267.698	257.364	198.915	316.595	223.39	254.676	16.5202	40.4662
96	252.801	292.801	226.715	217.439	235.427	218.271	277.23	185.392	180.13	231.801	12.6259	37.8778	96	213.966	263.537	252.6	225.167	211.928	227.011	239.633	173.156	219.381	190.473	221.685	8.53705	26.9965	96	168.919	200.061	135.476	100.098	133.731	193.365	106.232	137.208	119.418	143.834	12.0086	36.0258	96	264.094	276.621	254.712	204.348	321.749	232.279	258.967	16.3229	39.9827
97	253.2	288.811	241.215	226.767	251.122	215.638	243.693	181.959	160.168	229.175	12.9911	38.9733	97	211.876	267.604	231.505	218.149	214.91	224.448	247.69	190.513	202.307	190.473	219.948	7.69895	24.3462	97	118.616	192.367	137.58	103.398	132.994	183.32	140.397	139.339	116.321	140.481	9.88128	29.6438	97	258.226	267.698	277.013	226.079	316.595	237.029	263.773	13.0992	32.0865
98	248.811	288.811	247.25	218.409	235.959	222.327	238.104	185.5	157.958	227.014	12.6351	37.9054	98	213.909	260.226	251.518	254.525	201.285	213.637	248.811	173.156	214.062	186.287	221.742	9.65932	30.5454	98	139.11	169.283	132.764	95.2589	133.107	193.365	120.396	134.462	122.516	137.807	9.4906	28.4718	98	281.701	240.928	237.714	204.348	313.377	236.377	252.408	15.8006	38.7034
99	253.63	309.176	237.797	227.139	239.35	224.091	205.686	192.258	152.803	226.881	14.3885	43.1656	99	213.49	267.604	253.682	201.62	188.38	216.2	251.849	172.202	210.424	193.962	216.941	9.87151	31.2165	99	143.084	184.672	134.334	98.373	128.565	190.854	92.0683	136.051	118.18	136.242	11.2725	33.8176	99	264.094	240.928	252.321	233.323	329.993	216.903	256.26	16.1488	39.5563
100	252.202	291.281	229.399	218.409	239.883	215.713	254.873	185.392	150.224	226.375	13.713	41.1389	100	201.972	268.474	235.832	236.941	193.701	219.042	251.281	173.156	230.296	192.566	220.326	9.38993	29.6936	100	133.545	192.367	143.299	99.9469	133.408	190.539	99.1496	145.131	120.599	139.776	11.2224	33.6672	100	264.094	232.005	265.058	207.97	325.055	227.08	253.544	16.9303	41.4706
101	251.558	271.558	228.09	223.857	244.283	215.758	230.279	181.959	137.702	220.56	13.2628	39.7885	101	196.311	274.256	254.223	248.715	195.475	233.024	251.558	173.986	210.424	193.264	223.124	10.5902	33.4892	101	143.084	200.061	131.103	93.2289	135.72	187.391	99.1501	132.779	114.987	137.501	12.0405	36.1215	101	258.226	249.852	254.972	177.184	316.431	226.881	247.258	18.5265	45.3805
102	253.706	273.706	231.762	213.559	239.35	218.454	225.808	188.825	136.966	220.237	13.164	39.4919	102	204.445	256.899	248.814	248.715	185.475	225.846	253.706	169.157	223.859	199.543	221.646	9.78198	30.9333	102	168.919	192.367	128.996	95.1085	129.946	175.472	120.396	130.645	121.194	140.338	10.474	31.422	102	264.094	267.698	256.841	211.592	318.569	226.085	257.48	15.2445	37.3411
103	248.811	289.176	240.16	211.992	237.444	215.713	260.462	171.659	157.9	225.924	13.906	41.718	103	189.768	256.899	248.814	236.941	183.701	243.835	248.811	189.565	217.423	191.869	220.763	9.32562	29.4902	103	134.34	184.672	132.529	96.6932	126.671	183.553	140.397	134.223	124.74	139.757	9.35366	28.061	103	234.751	232.005	253.103	159.075	316.946	220.06	235.99	20.8437	51.0565
104	251.312	291.281	237.544	221.051	247.877	212.119	264.933	188.825	131.887	227.426	15.576	46.7281	104	196.311	267.604	255.846	101.543	188.303	244.765	251.312	171.664	223.019	193.264	209.363	15.8716	50.1903	104	151.033	184.672	127.1	106.224	130.51	172.593	153.314	128.725	127.847	142.447	8.31263	24.9379	104	264.094	249.852	265.058	240.567	316.762	216.893	258.871	13.657	33.4527
105	248.811	268.811	237.797	219.752	251.122	222.327	260.462	181.959	136.966	225.334	14.0565	42.1696	105	200.378	282.36	275.318	172.262	159.023	216.2	248.811	169.157	202.307	193.962	211.978	13.7873	43.5991	105	143.084	176.977	138.609	96.238	127.706	156.701	140.397	140.381	125.613	138.412	7.36787	22.1036	105	258.226	267.698	257.364	207.97	313.288	223.349	254.649	15.0418	36.8447
106	252.202	272.202	237.544	224.827	242.321	217.851	251.519	181.959	117.815	222.027	15.5641	46.6924	106	200.378	286.412	226.096	195.733	182.493	216.2	253.63	172.556	217.423	192.566	214.349	10.8856	34.4232	106	158.983	184.672	128.636	89.4142	135.679	150.674	120.396	130.28	122.516	135.694	8.97084	26.9125	106	246.488	249.852	251.798	226.079	316.595	230.778	253.598	13.3098	32.6022
107	247.69	267.69	238.852	224.602	251.122	210.237	254.873	178.75	121.866	221.742	15.3669	46.1008	107	200.378	292	222.31	225.167	211.928	224.448	247.69	168.035	212.104	193.264	219.732	10.5037	33.2157	107	170.906	192.367	131.163	90.789	134.515	174.782	120.396	132.84	125.613	141.486	10.5803	31.7409	107	223.013	267.698	249.669	206.159	330.209	220.758	249.584	18.4853	45.2797
108	250.744	291.281	234.125	224.229	245.236	210.237	270.522	175.092	163.139	229.401	13.9358	41.8073	108	193.834	297.116	233.669	207.506	194.267	216.2	250.744	169.157	216.86	199.543	217.89	11.3358	35.8471	108	155.008	169.283	133.859	90.4407	130.439	156.701	140.397	135.57	116.321	136.446	7.82956	23.4887	108	269.963	276.621	234.279	245.999	319.226	225.211	261.883	14.0592	34.4378
109	248.811	273.415	238.852	223.632	253.084	220.176	229.162	179.438	171.635	226.467	11.0795	33.2386	109	208.187	311.873	221.769	260.488	217.249	189.173	253.415	173.771	221.061	191.869	224.885	12.9048	40.8084	109	143.084	184.672	131.181	91.491	138.829	174.782	153.314	132.858	116.321	140.726	9.45121	28.3536	109	246.488	276.621	241.974	206.159	313.859	224.292	251.566	15.7392	38.5529
110	248.811	270.959	236.742	216.097	246.278	222.327	261.579	181.959	180.13	229.431	10.7906	32.3718	110	196.311	297.116	196.888	219.846	226.606	189.173	250.959	171.31	219.381	193.264	216.085	11.512	36.4041	110	139.11	153.893	136.024	92.6204	133.084	168.755	121.244	137.763	122.516	133.89	7.12551	21.3765	110	275.832	240.928	265.058	198.915	313.708	225.188	253.272	16.5288	40.4872
111	252.602	267.69	229.399	224.602	255.046	209.113	254.873	178.75	181.656	228.192	10.9147	32.744	111	205.793	298.859	207.165	219.28	206.041	189.173	253.63	169.157	216.583	203.032	216.871	11.3767	35.9763	111	168.919	176.977	124.881	85.5176	130.916	174.782	120.396	126.478	119.418	136.476	10.255	30.7649	111	269.963	258.775	257.364	182.617	313.859	220.007	250.431	18.3	44.8256
112	250.744	289.176	234.125	215.499	257.007	215.713	257.108	179.476	163.139	229.11	13.3561	40.0683	112	201.967	297.116	203.919	219.28	266.041	189.173	252.678	168.035	225.126	190.473	221.381	12.5824	39.7891	112	134.34	169.283	134.146	90.1021	136.062	190.539	131.989	135.861	116.321	137.627	9.55586	28.6676	112	281.701	267.698	249.669	189.861	325.055	215.911	254.982	19.6481	48.1278
113	253.63	273.63	234.125	223.857	231.503	217.563	272.758	181.959	191.677	231.189	10.7146	32.1437	113	208.511	318.525	223.392	202.751	199.511	196.116	248.811	173.986	215.743	190.473	217.782	12.8782	40.7246	113	151.033	153.893	135.948	93.1172	138.304	187.391	121.244	137.686	122.516	137.903	8.66128	25.9838	113	281.701	267.698	253.103	190.101	316.431	217.027	254.343	18.5318	45.3935
114	250.744	273.63	230.707	211.619	248.207	217.28	268.287	171.659	210.194	231.37	10.8079	32.4238	114	206.495	316.758	220.146	219.28	266.041	196.116	253.63	173.156	198.669	199.543	224.983	13.4105	42.4078	114	143.084	169.283	125.547	87.0969	134.849	175.472	140.397	127.152	118.18	135.673	8.84458	26.5337	114	234.751	276.621	249.669	182.617	318.569	231.544	248.962	18.724	45.8642
115	249.464	267.69	230.707	205.799	242.321	218.384	233.633	181.008	241.452	230.051	8.51211	25.5363	115	196.311	318.525	244.487	202.751	206.041	189.173	249.464	169.812	228.338	191.869	219.677	13.5636	42.8918	115	158.983	169.283	126.544	91.8377	130.648	183.553	121.244	128.162	120.599	136.761	9.48446	28.4534	115	269.963	267.698	249.669	186.239	316.946	232.478	253.832	17.7745	43.5385
116	252.801	272.801	233.07	211.186	242.321	211.095	233.633	185.5	200.503	226.99	9.13352	27.4006	116	202.855	313.557	200.674	195.733	211.928	224.448	252.801	169.157	219.381	192.566	218.31	12.684	40.1102	116	170.906	207.756	132.241	92.2681	137.638	172.593	153.314	133.932	114.987	146.182	11.4554	34.3663	116	258.226	240.928	257.364	236.945	316.762	231.514	256.956	12.7581	31.2509
117	248.811	268.811	240.16	206.141	251.122	224.525	247.047	185.392	193.203	229.468	9.60369	28.8111	117	215.943	308.911	220.146	207.506	194.267	225.846	248.811	173.156	221.901	193.264	220.975	11.7887	37.279	117	155.008	215.451	125.274	98.9651	132.172	156.701	140.397	126.876	121.194	141.338	10.9728	32.9185	117	281.701	240.928	249.669	151.832	313.288	217.289	242.451	22.6994	55.602
118	251.312	271.312	235.434	209.679	245.236	209.892	230.279	181.959	193.203	225.367	9.65281	28.9584	118	215.943	310.314	208.787	202.751	187.249	216.2	251.312	173.986	223.019	199.543	218.91	12.1092	38.2926	118	166.932	176.977	124.026	95.2547	132.47	150.674	131.989	125.611	124.74	136.519	8.26275	24.7882	118	264.094	232.005	226.584	224.268	316.595	227.547	248.516	14.8982	36.4931
119	248.811	289.176	228.344	207.367	253.084	216.823	225.808	181.959	168.913	224.476	12.2813	36.8438	119	209.399	308.935	216.901	219.28	194.267	219.042	250.744	169.157	202.307	191.869	218.19	12.155	38.4374	119	155.803	184.672	130.43	89.8013	136.081	174.782	153.314	132.097	127.847	142.759	9.42878	28.2863	119	264.094	249.852	237.714	195.294	313.859	223.582	247.399	16.4091	40.1938
120	252.202	272.202	227.035	201.919	241.845	205.281	247.047	178.75	160.087	220.708	12.2761	36.8282	120	194.722	308.83	203.919	219.28	206.041	224.448	252.202	168.035	199.509	193.264	217.025	12.3769	39.1393	120	170.906	169.283	129.968	91.1279	138.829	156.701	140.397	131.63	114.987	138.203	8.53827	25.6148	120	258.226	267.698	249.669	236.945	319.226	224.235	259.333	13.5214	33.1205
