# Supplementary material for: LTP and memory impairment caused by extracellular Aβ and Tau oligomers is APP-dependent
Source: eLife. 2017 Jul 11;6:e26991. doi: 10.7554/eLife.26991 (PMC5529106; doi:10.7554/eLife.26991)
Supplement: Figure 5—source data 3. — DOI: http://dx.doi.org/10.7554/eLife.26991.019 [file elife-26991-fig5-data3.xlsx]

## Sheet: Fig 5C
Figure 5C
	WT VEHICLE												APP KO VEHICLE															WT Tau													APP KO Tau
	Slice 1	Slice 2	Slice 3	Slice 4	Slice 5	Slice 6	Slice 7	Slice 8	AVG	ERROR	STDEV		Slice 1	Slice 2	Slice 3	Slice 4	Slice 5	Slice 6	Slice 7	Slice 8	Slice 9	Slice 10	Slice 11	AVG	ERROR	STDEV		Slice 1	Slice 2	Slice 3	Slice 4	Slice 5	Slice 6	Slice 7	Slice 8	Slice 9	Slice 10	AVG	ERROR	STDEV		Slice 1	Slice 2	Slice 3	Slice 4	Slice 5	Slice 6	Slice 7	Slice 8
Baseline 1	98.3438	93.6713	95.1812	101.135	90.4219	104.009	107.078	99.9454	98.7232	1.94648	5.50548	Baseline 1	103.752	91.2637	92.9289	88.6563	115.537	106.691	111.101	95.3243	94.7035	88.7358	99.6818	98.9432	2.76849	9.18206	Baseline 1	106.867	87.3319	85.6695	94.5698	102.242	85.6775	102.273	97.4671	100.876	97.6746	96.0649	2.39342	7.56866	Baseline 1	95.6301	72.5157	104.628	101.688	93.5227	103.529	91.3918	97.9126
2	94.8105	105.855	99.5241	103.757	86.2023	95.883	85.6624	92.5724	95.5333	2.61863	7.40661	2	91.4419	117.005	100.693	90.8914	93.0719	102.839	113.071	104.842	103.977	105.31	87.9545	101.009	2.81894	9.34937	2	107.668	115.834	99.0489	108.08	101.39	95.8235	106.061	94.0045	101.913	92.9828	102.28	2.28192	7.21605	2	93.3852	88.6303	99.9433	98.5228	93.0031	97.4386	108.58	97.3434
3	106.588	95.2434	101.334	116.313	101.875	107.259	79.8545	94.2108	100.335	3.8466	10.8798	3	103.752	64.3525	100.383	103.943	95.568	97.6561	92.978	84.4862	92.1846	98.5799	117.273	95.5596	4.00022	13.2672	3	99.6113	87.3319	101.333	104.789	102.242	95.8235	102.273	98.4785	102.776	102.58	99.7239	1.59479	5.04315	3	99.6708	116.383	107.127	98.5228	98.1989	101.564	114.03	92.7893
4	92.4549	97.8635	96.5645	92.4409	90.4219	90.195	85.6624	99.1262	93.0912	1.5968	4.51644	4	112.544	88.9237	92.9289	94.8648	95.2114	101.202	97.7057	91.5175	95.9067	99.7428	83.2842	95.8029	2.25724	7.48641	4	102.465	107.881	104.457	94.5698	107.354	95.8235	98.4848	99.2626	104.417	97.6746	101.239	1.49617	4.7313	4	96.079	68.487	96.5077	88.2353	103.914	98.028	97.261	101.897
5	88.3327	98.7806	95.1812	104.814	95.652	108.884	99.0472	101.993	99.0857	2.23622	6.32498	5	84.4079	93.6036	99.3892	96.1064	114.809	99.02	107.949	100.383	96.4012	98.2837	93.8181	98.561	2.36354	7.83897	5	104.066	77.0575	108.515	103.433	112.466	95.8235	94.697	94.0045	102.172	102.58	99.4813	3.11408	9.84758	5	96.528	119.964	101.817	98.9185	100.797	95.867	97.6804	99.6206
6	100.11	100.222	120.515	95.6236	94.2398	111.322	99.0472	100.765	102.73	3.1147	8.80969	6	105.51	99.454	103.365	98.8382	95.2114	102.021	92.978	102.893	95.8978	99.8582	89.1478	98.6521	1.48524	4.92599	6	103.666	87.3319	104.457	94.5698	102.242	105.97	98.4848	100.673	101.308	94.6889	99.3391	1.80194	5.69824	6	101.018	74.3062	100.568	97.3358	97.6793	101.564	93.488	96.7742
7	105.41	102.973	98.8002	100.225	108.506	79.6316	91.4703	99.1261	98.2679	3.20811	9.07389	7	100.235	108.814	97.8984	98.3415	111.971	97.7925	100.464	81.9228	100.372	97.7521	99.6818	99.5677	2.26302	7.5056	7	102.865	115.834	102.803	95.5602	91.7937	112.734	102.273	101.315	102.172	102.58	102.993	2.22279	7.02908	7	100.12	86.3921	99.9433	103.271	100.797	97.4386	93.0688	100.19
8	98.3438	103.628	115.448	96.1494	101.875	83.6945	107.078	102.403	101.078	3.23304	9.14442	8	94.9592	107.644	97.8983	102.812	94.1415	94.2463	111.101	99.5463	105.655	107.416	129	104.038	3.06836	10.1766	8	93.2589	119.452	99.0489	99.2343	99.4619	87.9322	102.273	104.264	99.6647	94.6889	99.9279	2.6307	8.31901	8	102.814	99.3733	101.505	105.249	103.395	92.9203	94.7456	103.605
9	98.3437	99.5667	104.229	96.486	106.296	118.635	109.014	108.547	105.14	2.54614	7.20157	9	105.51	111.154	110.322	107.033	87.3663	102.839	96.9177	105.979	105.713	97.2428	70.3636	100.04	3.62095	12.0093	9	95.2602	77.0575	102.803	97.2259	101.57	105.97	106.061	102.212	99.9262	97.6746	98.576	2.64415	8.36153	9	108.201	105.64	101.505	100.501	98.7183	103.529	93.488	95.0665
10	101.288	102.187	95.1812	93.4318	100.067	91.8201	112.432	105.27	100.21	2.39679	6.77914	10	105.51	106.474	101.377	106.537	107.692	98.4744	101.645	109.195	104.445	95.731	71.557	100.785	3.17068	10.5159	10	96.8612	119.452	100.226	99.2343	91.7937	112.734	102.273	106.957	94.8306	102.58	102.694	2.65146	8.38467	10	97.4259	83.7063	96.1953	98.1271	97.6793	99.796	97.6802	101.897
11	95.0012	105.855	92.6479	112.775	106.296	107.259	102.919	101.584	103.042	2.33704	6.61014	11	91.4419	109.984	104.359	99.8315	89.8624	95.0647	89.8262	92.1252	96.8137	89.9634	106.739	96.9101	2.20717	7.32037	11	104.866	99.535	102.803	108.08	95.426	84.067	98.4848	104.264	100.704	101.727	99.9957	2.09702	6.63135	11	103.263	115.04	96.5076	101.293	105.473	101.564	108.161	104.744
12	110.71	102.677	80.3431	92.475	101.474	116.197	109.755	99.1262	101.595	4.02003	11.3704	12	96.7175	107.644	104.452	99.5831	109.832	102.839	91.0081	110.384	109.662	110.996	111.409	104.957	2.03774	6.75841	12	91.2576	122.965	100.226	104.789	91.7937	95.8235	94.697	99.5191	102.431	102.347	100.585	2.8828	9.11623	12	99.2218	108.326	102.13	102.48	104.434	104.118	100.196	109.867
13	95.3993	104.283	99.5241	100.87	108.506	62.5678	94.1473	101.993	95.9114	5.03296	14.2353	13	100.235	112.325	92.9289	101.818	102.7	97.2469	95.7358	106.109	96.1613	102.558	104.352	101.106	1.65798	5.49891	13	96.4609	87.3319	85.6695	100.432	101.39	95.8235	106.061	102.725	95.6943	103.433	97.5021	2.13442	6.74963	13	99.6708	112.802	96.5077	104.062	98.7183	101.564	100.196	99.6206
14	108.355	93.6713	101.334	90.7091	101.875	132.449	112.432	100.765	105.199	4.61618	13.0565	14	100.235	81.9032	100.693	101.57	102.981	100.52	95.7358	108.488	100.415	104.252	118.466	101.387	2.64225	8.76336	14	100.864	79.6256	102.803	103.433	96.6899	109.352	90.9091	95.4152	97.508	104.286	98.0885	2.63654	8.33746	14	105.058	128.469	96.5077	105.249	104.953	99.796	98.5186	96.7742
15	106.588	93.6713	104.229	102.795	106.296	90.195	104.401	92.5724	100.093	2.3882	6.75485	15	103.751	99.4541	100.383	109.268	84.1568	101.611	101.645	106.815	101.694	103.578	117.273	102.694	2.40714	7.98359	15	94.0594	115.979	100.226	92.1363	102.242	120.625	94.697	99.5191	93.7078	102.58	101.577	3.04167	9.61862	15	101.916	119.964	98.694	96.5445	98.7183	101.368	111.515	101.897
Drugs 1	105.999	95.2434	96.5645	100.87	90.4219	91.8201	112.432	100.765	99.2644	2.60711	7.37402	Drugs 1	86.6854	106.904	92.9289	99.0865	102.343	106.691	98.4936	99.5544	100.76	104.813	117.273	101.412	2.39062	7.92878	Drugs 1	99.6113	92.1053	108.515	108.08	107.354	100.485	90.9091	103.879	102.476	103.006	101.642	1.94501	6.15067	Drugs 1	102.203	74.3062	114.935	102.8	97.6313	101.368	101.476	106.142
2	92.4549	97.8635	120.515	96.486	86.2023	116.197	94.1473	101.993	100.732	4.18618	11.8403	2	100.838	103.418	98.8952	103.06	90.5756	95.4738	96.5238	98.3148	97.1346	102.918	83.2842	97.3123	1.81877	6.03219	2	96.8613	87.3319	101.333	108.08	81.7937	106.899	94.697	96.5694	98.1315	95.9685	96.7665	2.52001	7.96898	2	104.846	134.023	107.751	107.42	106.603	105.493	99.7987	99.0655
3	88.3327	98.7806	98.8002	92.475	101.875	104.009	79.8545	99.1261	95.4067	2.84442	8.04523	3	105.51	92.9596	102.851	102.067	112.328	103.385	111.101	84.8674	88.8052	94.4406	93.8181	99.2847	2.6914	8.92637	3	98.8625	74.5614	102.803	87.8148	92.0179	95.8235	98.4848	110.933	99.6647	107.058	96.8024	3.25819	10.3033	3	99.2218	89.834	107.127	99.3349	96.5759	105.886	108.605	102.876
4	100.11	100.222	115.448	116.313	83.5901	107.259	99.0472	92.5724	101.82	3.91054	11.0607	4	102.607	88.9237	92.9289	97.0998	84.8701	101.748	96.9177	96.1504	97.9049	96.9391	89.1478	95.0216	1.65991	5.50528	4	96.8612	119.452	114.226	108.08	107.354	100.485	98.4848	105.034	100.048	107.698	105.772	2.27038	7.17957	4	108.201	114.599	113.061	103.955	105.473	102.35	114.056	97.4329
5	104.233	102.973	104.229	100.225	96.852	95.883	109.014	108.547	102.744	1.71961	4.8638	5	106.145	108.066	97.4117	105.047	84.5135	103.521	101.645	109.078	109.583	107.769	89.1478	101.993	2.52006	8.35808	5	93.2589	99.535	104.457	99.2343	97.13	95.8235	106.061	103.751	102.859	103.006	100.512	1.32155	4.17909	5	103.084	116.383	115.872	101.293	103.964	106.672	103.573	103.965
6	98.3438	103.628	96.5645	100.87	95.652	95.883	102.919	99.1262	99.1233	1.09751	3.10424	6	100.235	111.154	100.383	103.308	92.3587	106.691	89.8262	102.01	96.7859	107.018	99.6818	100.859	1.90178	6.30748	6	95.2602	65.7895	99.0489	108.08	97.13	105.83	102.273	104.521	99.4092	108.551	98.5892	3.91636	12.3846	6	98.6784	107.801	111.499	104.34	102.381	103.332	106.508	101.243
7	95.0012	102.677	100.248	96.1494	108.506	91.8201	94.1473	94.2108	97.845	1.96816	5.5668	7	105.51	110.39	100.873	102.067	89.8624	103.521	96.9177	89.0422	95.9831	96.6194	129	101.799	3.33173	11.0501	7	96.8612	122.965	94.2364	94.5698	92.0179	87.9322	106.061	108.24	102.987	111.963	101.783	3.3898	10.7195	7	101.018	113.628	101.817	97.3358	102.909	101.171	101.476	103.42
8	101.288	102.187	101.696	100.87	101.875	90.195	85.6624	100.765	98.0672	2.25987	6.39188	8	94.9592	105.742	103.84	96.8515	109.832	106.691	96.1298	104.577	103.984	99.6403	104.352	102.418	1.44921	4.8065	8	104.866	115.979	102.803	103.433	97.13	95.8235	98.4848	99.1343	104.648	110.47	103.277	1.97545	6.24692	8	104.405	88.6303	98.0693	101.645	104.434	101.564	106.089	107.23
9	105.41	105.855	75.2764	104.814	106.296	104.009	99.0472	99.1261	99.9793	3.67269	10.3879	9	106.145	109.228	103.933	97.5965	106.623	106.522	95.7358	97.3929	94.1862	99.3702	71.557	98.9353	3.14246	10.4224	9	93.2589	74.5614	94.2364	97.2718	107.354	95.8235	102.273	102.725	102.476	103.859	97.3839	2.92486	9.24922	9	97.4259	99.5457	89.6366	101.293	98.159	107.261	97.2827	104.744
10	110.71	104.152	103.505	100.87	100.067	107.259	102.919	101.993	103.934	1.24173	3.51214	10	91.9925	107.644	100.383	100.08	102.7	103.521	101.645	102.186	97.9695	103.308	106.739	101.652	1.28045	4.24679	10	96.4609	87.3319	110.962	103.433	97.13	90.8642	98.4848	98.4785	107.204	105.352	99.5701	2.30931	7.30268	10	101.018	116.383	91.1982	99.335	99.2145	92.331	107.766	100.699
11	95.3993	104.283	98.4383	101.135	95.652	104.009	112.432	101.993	101.668	1.95708	5.53545	11	97.2999	98.7698	103.84	97.0998	84.1568	98.4744	101.645	95.812	103.289	99.0563	104.352	98.5268	1.685	5.58852	11	100.864	87.3319	101.333	99.2343	101.57	105.97	106.061	99.5191	108.481	103.219	101.358	1.83333	5.79751	11	104.846	92.2619	96.5077	98.9185	104.434	91.3487	109.443	107.231
12	95.0012	105.855	100.248	96.486	101.474	91.8201	79.8545	100.765	96.4379	2.82109	7.97924	12	100.235	106.904	100.383	101.818	102.343	103.521	96.5238	94.2406	94.4601	99.6816	104.352	100.406	1.21443	4.02782	12	95.2602	77.0575	101.333	94.5698	107.354	103.692	102.273	101.058	103.37	103.219	98.9188	2.71646	8.5902	12	97.7974	93.7187	90.2612	100.501	101.853	105.493	106.089	107.775
13	106.588	104.152	111.105	103.757	107.502	104.009	94.1473	99.1261	103.798	1.84211	5.21028	13	100.838	103.418	92.467	102.315	90.5756	106.522	101.645	104.726	103.791	103.358	117.273	102.448	2.10833	6.99254	13	104.866	92.1053	94.2364	97.2718	102.242	114.382	94.697	100.673	99.6647	101.087	100.123	2.0228	6.39667	13	102.814	88.6303	94.6337	100.105	100.797	105.886	104.831	98.5212
14	94.8105	104.283	98.1857	100.225	95.652	91.8201	112.432	92.5724	98.7476	2.43343	6.88278	14	100.838	117.005	100.193	97.5965	84.5135	98.4744	98.4936	108.632	103.447	98.686	93.8181	100.154	2.46094	8.16201	14	96.8613	107.881	99.0489	101.325	99.4619	100.485	106.061	95.7999	101.198	98.1011	100.622	1.20499	3.81051	14	99.5595	69.4392	89.6366	100.49	98.6868	102.35	101.057	103.605
15	91.2771	102.677	96.5645	92.475	95.652	91.8201	99.0472	92.5724	95.2606	1.42604	4.03345	15	94.9592	98.7696	99.8841	100.08	112.328	103.521	96.5238	104.138	104.318	96.8267	89.1478	100.045	1.82655	6.05799	15	100.864	87.3319	94.2364	103.433	107.354	106.899	102.273	96.1847	99.4092	102.793	100.078	1.93139	6.10759	15	104.405	82.0645	83.7025	101.688	101.853	106.672	121.603	110.497
16	98.3438	92.5514	106.857	96.486	100.961	116.197	85.6624	100.765	99.7279	3.23601	9.15282	16	95.5309	112.325	100.873	100.08	84.8701	99.1564	96.1298	109.476	105.103	101.114	89.1478	99.4368	2.42825	8.05359	16	99.6113	99.535	108.515	97.2718	97.13	105.83	106.061	99.5191	102.476	103.006	101.895	1.24158	3.92623	16	103.084	110.229	91.1982	103.955	100.797	107.261	114.056	97.4329
17	101.288	100.774	97.1502	101.135	106.157	107.259	102.919	108.547	103.154	1.36461	3.8597	17	105.51	98.7698	104.359	97.0998	84.5135	95.4738	101.645	104.547	96.4277	103.676	99.6818	99.2458	1.81685	6.0258	17	96.8612	74.5614	94.2364	101.325	101.39	100.485	102.273	101.058	107.204	95.9685	97.5362	2.80444	8.86842	17	102.814	99.3733	96.5077	98.9185	103.914	92.331	103.573	101.897
18	95.0012	92.699	97.4035	103.757	105.239	95.883	99.0472	94.2108	97.9051	1.5972	4.51758	18	100.235	106.904	103.933	101.818	92.3587	103.385	91.0081	113.899	106.126	105.611	71.557	99.7122	3.42118	11.3468	18	104.866	99.535	99.0489	108.08	97.13	106.899	98.4848	98.4785	99.6647	107.058	101.925	1.34751	4.26119	18	103.524	113.628	90.2612	104.34	102.381	91.3487	106.508	101.243
19	104.233	92.5514	93.7318	104.814	95.652	104.009	102.919	100.765	99.8343	1.79147	5.06704	19	91.9925	106.474	104.359	102.315	89.8624	106.691	98.4936	97.7472	91.6531	93.4836	117.273	100.031	2.51495	8.34115	19	99.6113	87.3319	99.0489	99.2343	107.354	105.83	98.4848	95.7999	103.37	107.698	100.376	1.94175	6.14035	19	104.405	85.9492	94.6337	104.34	102.909	105.493	101.476	103.42
20	100.11	102.677	94.0865	101.135	103.862	90.195	99.0472	92.5724	97.9607	1.77932	5.03269	20	97.2999	92.9596	103.84	97.5965	109.832	103.521	96.5238	100.214	99.665	103.681	89.1478	99.48	1.72423	5.71861	20	93.2589	99.535	102.803	97.2718	101.39	90.8642	102.273	96.1847	100.304	103.006	98.6891	1.32507	4.19022	20	99.5595	108.326	89.6366	101.645	103.964	105.886	106.089	100.19
Tetanus												Tetanus															Tetanus														Tetanus
1	316.71	236.852	245.734	301.234	298.393	370.776	281.843	243.934	286.934	15.998	45.2491	1	301.676	254.477	229.931	246.749	288.808	253.762	198.038	271.138	295.857	320.604	302.809	269.441	11.0742	36.7289	1	182.515	135.965	219.885	170.226	214.709	160.349	143.939	237.677	123.232	170.326	175.882	12.0168	38.0005	1	200	427.145	220.187	192.011	259.904	267.713	369.423	197.587
2	309.665	247.231	244.648	350.235	290.771	325.234	268.857	245.917	285.32	14.2416	40.2812	2	282.216	238.328	226.964	206.865	287.809	244.897	207.493	257.573	291.228	294.371	304.439	258.38	10.7639	35.6998	2	183.716	149.123	194.184	141.396	204.484	162.487	143.939	261.577	120.541	168.905	173.035	12.7773	40.4054	2	192.952	414.693	210.505	194.457	252.516	282.572	358.94	167.65
3	301.443	258.861	255.143	306.244	285.435	270.244	265.544	251.867	274.348	7.41958	20.9858	3	296.369	238.328	223.503	203.388	295.298	252.808	205.917	252.269	289.677	283.66	304.118	258.667	11.2731	37.3885	3	196.124	135.965	191.328	170.226	184.036	163.556	132.576	244.475	116.595	201.605	173.648	12.1102	38.296	3	199.119	438.001	219.563	209.133	258.849	282.085	365.23	173.637
4	281.443	269.991	281.563	317.235	287.722	243.246	265.401	249.09	274.461	8.2643	23.375	4	292.83	234.842	215.097	200.905	289.806	250.762	211.17	248.379	276.442	275.872	306.882	254.817	10.9283	36.2451	4	186.118	135.897	194.184	138.379	184.036	142.176	128.788	252.587	116.954	197.908	167.703	13.3491	42.2135	4	206.608	436.059	208.007	214.841	264.126	274.533	368.165	168.738
5	264.409	274.993	259.124	317.438	290.771	245.247	264.21	262.972	272.396	7.91243	22.3797	5	298.138	224.384	208.669	202.891	294.3	253.217	230.606	231.335	261.292	270.024	327.097	254.723	11.9944	39.781	5	189.32	149.123	177.05	131.605	173.812	166.762	128.788	240.747	117.851	203.027	167.808	11.9368	37.7475	5	211.454	486.56	203.01	207.503	277.32	274.29	372.778	173.093
6	279.087	275.744	233.791	331.235	287.722	238.346	269.547	261.386	272.107	10.7995	30.5457	6	280.447	226.708	217.075	199.166	320.509	251.853	222.202	219.384	261.375	260.322	328.405	253.404	12.8199	42.5189	6	181.315	135.094	177.05	128.345	173.812	168.595	128.788	244.694	112.29	199.046	164.903	12.6226	39.9162	6	206.167	451.112	208.631	215.248	290.513	268.443	369.423	182.346
7	243.798	274.368	248.267	374.574	290.771	190.244	264.21	268.525	269.345	18.3899	52.0144	7	296.369	240.772	205.702	202.146	299.542	249.943	218.524	241.59	260.125	265.058	321.062	254.621	11.7347	38.9198	7	179.313	115.63	191.328	131.605	184.036	168.595	128.788	248.202	114.981	195.349	165.783	13.5305	42.7873	7	215.859	461.309	218.938	211.579	285.763	260.892	388.292	184.524
8	253.22	279.12	279.753	316.625	291.914	160.464	273.551	268.129	265.347	16.3418	46.2216	8	271.676	223.342	212.13	203.14	300.29	252.808	220.626	213.019	252.222	259.894	328.405	248.868	11.9902	39.767	8	187.318	122.807	157.061	138.379	153.363	168.595	143.939	250.833	115.16	196.202	163.366	12.6667	40.0558	8	218.943	458.882	214.878	208.318	283.652	261.379	373.616	174.726
9	252.043	274.243	261.296	370.953	303.728	202.246	273.418	260.196	274.765	17.0409	48.1989	9	275.214	233.8	217.075	201.401	303.036	256.354	208.018	215.493	246.419	264.87	330.769	250.223	12.3977	41.1186	9	180.514	122.807	154.205	145.89	173.812	176.383	132.576	250.614	112.469	200.752	165.002	12.9652	40.9995	9	224.67	468.593	220.187	211.987	285.236	260.161	386.196	181.258
10	247.332	276.369	271.791	302.138	293.057	190.244	269.547	270.905	265.173	12.1727	34.4296	10	287.523	247.624	225.481	200.16	313.77	252.262	222.202	220.443	244.746	265.59	330.769	255.506	12.3132	40.8383	10	186.518	114.035	194.184	124.665	209.596	151.797	143.939	244.475	112.29	207.292	168.879	14.4831	45.7997	10	222.907	440.915	210.505	200.572	286.291	266.495	399.195	182.346
11	240.265	277.995	256.953	307.571	279.338	159.246	265.544	264.956	256.483	15.5076	43.862	11	298.138	224.384	217.569	203.885	334.738	248.989	215.898	201.42	236.989	269.969	327.097	252.643	14.5513	48.2612	11	184.116	115.63	174.195	127.606	224.933	151.797	134.948	257.849	114.981	211.842	169.79	15.6499	49.4893	11	221.145	437.03	219.563	199.757	183.652	265.277	400.034	185.612
12	247.332	280.371	286.267	303.949	293.438	170.246	268.213	273.285	265.388	14.87	42.0586	12	206.983	234.842	226.47	205.375	312.771	251.171	231.657	217.119	229.925	264.086	322.37	245.706	11.9166	39.5229	12	183.316	118.421	174.195	136.474	224.933	162.487	132.576	255.876	110.855	201.321	170.045	15.0214	47.5017	12	218.062	452.083	217.064	209.541	188.93	267.225	387.035	177.448
13	253.22	281.746	280.839	329.302	287.341	190.246	250.866	269.319	267.86	14.0439	39.7222	13	287.523	240.652	216.58	204.878	316.765	258.263	229.031	219.454	237.378	266.492	327.592	254.964	12.3317	40.8995	13	184.917	114.035	197.04	124.665	173.812	189.211	128.788	256.753	112.111	208.429	168.976	15.1168	47.8036	13	227.313	448.199	222.998	198.942	185.763	266.251	387.454	185.068
14	257.343	280.496	282.286	323.869	287.722	185.246	264.21	267.732	268.613	13.9154	39.3586	14	294.6	232.518	212.625	199.166	323.505	250.898	219.575	209.198	227.459	255.275	327.35	250.197	13.7472	45.5944	14	183.716	131.579	143.464	131.605	209.596	171.038	121.212	242.063	112.111	198.761	164.515	13.688	43.2851	14	223.348	447.713	216.44	197.719	184.18	259.674	391.228	182.891
15	257.343	280.371	264.191	229.541	263.332	180.246	258.872	266.939	250.104	11.1844	31.6343	15	292.831	249.948	213.305	199.663	329.745	252.126	223.777	211.391	234.358	256.638	317.897	252.88	13.1648	43.6628	15	176.111	122.807	177.05	138.379	224.933	182.797	127.747	259.384	109.241	194.781	171.323	15.1139	47.7943	15	219.824	447.227	232.68	199.757	184.18	271.854	389.131	172.004
16	255.576	279.87	272.515	361.898	258.378	202.246	269.547	261.783	270.227	15.5552	43.9967	16	278.678	238.328	216.982	200.16	327.499	256.081	223.778	195.266	221.873	259.596	327.35	249.599	13.8577	45.9607	16	183.316	122.807	165.479	138.379	172.96	176.383	134.948	248.271	115.519	197.055	165.512	12.6175	39.9	16	221.145	409.837	232.68	192.419	185.236	272.341	404.227	186.701
17	253.221	283.622	271.791	223.869	255.711	199.246	272.216	268.922	253.575	10.0503	28.4264	17	296.369	255.758	214.881	199.911	324.503	245.988	217.474	205.38	230.452	263.921	327.35	252.908	13.8193	45.8336	17	180.514	118.421	177.05	128.345	172.96	182.797	132.576	258.467	104.218	195.634	165.098	14.4142	45.5819	17	222.026	414.207	232.68	189.973	181.542	273.559	395.84	180.713
18	264.409	280.371	260.572	254.654	261.427	202.246	264.21	272.095	257.498	8.36101	23.6485	18	206.983	231.356	226.439	202.146	328.248	252.262	222.202	203.613	236	263.26	326.295	245.346	13.5008	44.7772	18	174.51	118.421	155.478	124.665	153.363	182.797	132.576	267.589	113.366	199.614	162.238	14.83	46.8966	18	229.515	427.804	236.428	195.68	181.542	269.661	389.131	185.068
19	251.454	281.121	244.648	296.705	267.524	195.246	265.544	255.436	257.21	10.6411	30.0975	19	296.369	234.842	220.134	199.166	326.999	254.717	213.272	195.266	221.231	257.735	310.554	248.208	13.7082	45.465	19	174.51	124.426	171.339	128.345	153.363	178.521	127.747	262.581	113.725	206.155	164.071	14.4001	45.5373	19	228.194	384.586	237.053	190.788	185.763	270.879	393.324	179.625
20	258.521	275.744	279.029	298.516	283.149	188.249	265.544	270.112	264.858	11.7443	33.2178	20	178.678	241.814	211.203	203.14	334.738	252.126	214.322	203.329	225.617	259.597	315.28	239.986	14.5652	48.3075	20	181.715	122.807	174.195	131.605	165.438	188.142	128.788	263.475	106.191	191.084	165.344	14.5073	45.876	20	223.789	415.179	237.365	189.565	183.125	279.162	414.71	191.6
21	252.632	276.619	290.248	361.898	262.189	184.239	273.551	256.23	269.701	17.3298	49.0162	21	171.601	249.948	222.236	201.153	325.003	249.125	217.474	195.408	223.776	248.204	310.391	237.665	14.0234	46.5102	21	179.714	131.579	165.479	127.606	178.924	181.728	134.948	252.206	114.084	198.477	166.475	13.0832	41.3726	21	217.621	393.813	236.74	189.973	189.458	278.187	392.066	181.257
22	252.632	282.121	285.544	303.949	256.092	184.239	256.204	266.542	260.915	12.6301	35.7233	22	189.292	241.814	236.421	195.938	336.485	251.307	203.291	203.329	224.498	252.215	302.409	239.727	13.7979	45.7624	22	174.51	118.421	143.464	130.479	165.438	138.969	128.788	256.857	120.721	203.311	158.096	13.8621	43.8357	22	223.789	388.957	244.549	194.457	188.402	269.905	395.421	181.258
23	266.176	277.745	283.01	173.949	250.375	190.246	254.869	264.162	245.067	14.3335	40.5412	23	203.445	264.012	229.066	198.918	350.214	253.762	225.879	201.703	239.063	255.673	292.955	246.79	13.5735	45.0181	23	173.71	118.421	140.335	128.345	172.96	182.797	134.948	252.743	111.752	203.027	161.904	13.8904	43.9254	23	225.551	439.944	257.041	184.673	180.486	273.802	389.97	188.334
24	259.109	277.745	295.315	245.6	219.507	185.246	249.532	255.436	248.436	11.996	33.9298	24	208.752	248.786	226.964	200.16	321.508	249.398	221.151	193.215	217.191	250.714	300.045	239.808	12.183	40.4065	24	178.112	122.807	143.464	130.479	153.363	143.245	132.576	253.458	113.546	197.624	156.867	13.3928	42.3519	24	228.634	391.385	237.677	191.604	180.486	280.38	404.646	197.587
25	263.231	278.37	291.334	247.411	246.564	190.246	256.204	264.162	254.69	10.6406	30.0962	25	199.907	253.434	228.541	201.898	322.257	249.943	204.341	201.278	214.317	241.927	292.955	237.345	12.2092	40.4933	25	167.306	122.807	151.349	128.345	168.438	178.521	132.576	245.588	115.16	207.008	161.71	12.9942	41.0912	25	226.872	413.236	237.99	188.342	187.874	279.892	377.81	195.954
26	260.287	280.121	318.477	261.898	234.751	185.246	270.882	254.643	258.288	13.4811	38.1302	26	178.678	245.3	229.066	200.16	320.01	249.534	225.353	197.459	222.893	247.347	296.374	237.47	12.601	41.7927	26	171.708	122.807	131.36	127.606	153.363	165.693	121.212	241.116	114.084	196.202	154.515	12.7667	40.3718	26	222.026	416.635	231.431	183.45	179.431	272.828	398.356	184.523
27	264.409	281.371	297.486	249.621	243.897	188.249	265.544	251.47	255.256	11.4331	32.3378	27	192.83	248.786	242.726	197.428	323.006	249.261	227.455	201.562	225.62	236.534	298.737	240.359	12.2103	40.4969	27	172.509	124.426	158.474	127.606	161.031	156.683	128.788	240.043	108.882	203.027	158.147	12.6038	39.8566	27	222.908	363.221	235.804	174.074	180.486	275.508	407.162	193.233
28	268.531	279.245	293.144	280.407	246.564	190.246	256.204	260.196	259.317	11.1922	31.6564	28	205.214	251.11	233.794	202.891	332.241	250.216	210.645	203.471	218.383	246.481	301.354	241.436	12.7239	42.2006	28	172.909	118.421	125.649	124.665	163.587	173.176	132.576	236.287	107.088	201.036	155.539	13.0669	41.3213	28	225.991	373.904	233.617	172.851	184.708	274.29	398.356	189.422
29	260.287	285.123	283.734	227.491	234.37	185.246	256.323	264.162	249.592	11.696	33.0814	29	191.061	232.518	253.233	200.656	335.237	257.309	206.443	207.431	220.891	243.83	286.92	239.594	12.9017	42.7902	29	167.706	131.579	111.37	121.59	168.438	175.925	121.212	235.035	110.855	191.653	153.536	12.9813	41.0504	29	228.194	359.336	234.242	179.374	181.014	275.508	405.065	194.321
30	262.054	277.244	294.591	251.033	224.08	185.246	256.5	261.386	251.517	11.8738	33.5843	30	196.369	229.032	241.15	200.408	321.758	256.081	214.847	205.38	213.848	233.92	300.045	237.531	12.2942	40.7752	30	169.307	123.098	142.782	121.59	153.363	152.102	132.576	229.49	117.133	206.155	154.76	11.8325	37.4176	30	225.551	379.245	232.368	181.004	182.597	274.777	395.421	191.599
31	257.343	283.122	285.905	360.087	252.281	190.246	252.2	255.04	267.028	16.8214	47.578	31	219.367	256.92	235.896	201.65	338.981	239.491	214.847	193.499	216.72	234.31	296.627	240.755	12.9919	43.0892	31	174.51	134.044	165.479	139.479	132.915	169.511	121.212	235.571	100.272	202.174	157.517	12.7625	40.3587	31	221.145	380.702	217.064	178.151	179.958	275.02	403.808	189.423
32	262.643	279.495	290.248	285.839	237.037	190.246	251.367	247.503	255.547	11.5222	32.5898	32	176.909	259.244	243.777	199.663	329.745	223.353	203.291	197.459	211.867	235.653	297.935	234.445	13.918	46.1609	32	170.107	122.807	158.474	124.438	148.438	175.925	125	214.217	105.115	200.752	154.527	11.3909	36.0213	32	227.313	366.62	231.431	185.081	182.597	276.969	382.422	197.043
33	256.754	284.122	300.02	280.407	229.797	189.464	250.866	251.867	255.412	12.3051	34.804	33	196.369	230.194	235.896	199.166	335.736	207.445	203.816	209.34	212.577	247.028	290.845	233.492	13.17	43.68	33	168.907	118.421	131.36	121.59	158.475	161.265	132.576	246.886	113.366	207.292	156.014	13.6061	43.0263	33	219.824	372.932	226.434	180.597	183.652	272.584	375.713	189.966
34	254.987	286.748	288.077	285.839	236.656	188.249	246.863	247.9	254.415	11.9218	33.7199	34	196.369	231.356	238.523	202.643	323.754	196.627	218.525	195.55	220.493	245.473	281.793	231.919	12.1161	40.1844	34	168.907	114.035	143.464	128.345	148.438	175.925	121.212	247.983	108.882	193.359	155.055	13.5735	42.9233	34	229.515	336.028	224.248	185.081	182.597	269.905	393.324	187.789
35	265.587	284.748	285.544	338.356	241.991	189.464	245.528	258.609	263.728	15.1396	42.8213	35	199.907	246.462	225.914	197.428	324.503	181.673	221.151	211.391	216.782	232.685	274.049	230.177	12.0857	40.0838	35	173.71	124.426	134.215	131.605	132.915	182.339	125	239.87	116.774	201.605	156.246	13.0043	41.1231	35	223.348	369.048	232.368	176.928	178.903	265.033	378.648	197.043
36	260.876	290.25	295.315	294.894	228.272	184.239	244.194	259.006	257.131	13.5698	38.3813	36	205.214	236.004	228.541	198.173	326.999	173.899	222.727	201.278	210.463	244.919	281.139	229.941	12.9049	42.8007	36	172.509	115.63	143.464	127.606	148.438	175.925	121.212	235.485	116.774	205.87	156.291	12.8551	40.6513	36	221.586	338.941	222.061	185.489	175.736	274.29	390.808	190.511
37	270.887	284.372	296.039	260.487	230.94	195.246	243.334	268.525	256.229	11.4063	32.2618	37	192.83	247.624	226.964	198.918	319.012	173.722	213.797	203.329	216.031	248.545	283.502	229.48	12.8382	42.5796	37	162.903	127.894	142.782	131.605	158.475	157.6	125	238.555	109.779	200.183	155.478	12.2376	38.6985	37	222.026	334.085	231.431	181.82	183.125	280.136	373.197	179.08
38	261.465	282.622	302.191	291.272	216.458	202.246	244.194	257.023	257.184	12.4632	35.2512	38	198.138	259.364	226.439	198.421	325.252	172.222	210.12	207.431	220.077	233.23	275.104	229.618	12.914	42.8308	38	167.706	131.579	151.349	124.665	130.438	161.265	125	239.432	106.55	193.643	153.163	12.5263	39.6116	38	219.383	363.221	225.185	175.705	178.375	276.726	381.583	190.511
39	260.287	288.749	290.972	247.81	223.318	190.244	244.194	253.453	249.878	11.6643	32.9915	39	214.059	246.462	234.845	198.421	314.519	174.541	209.594	189.255	202.983	227.384	277.72	226.344	12.3246	40.8759	39	170.908	114.035	131.36	138.379	158.475	179.59	117.424	238.335	103.142	200.183	155.183	13.5278	42.7788	39	228.194	331.657	226.122	174.889	179.958	271.366	396.26	194.866
40	264.409	296.253	289.525	274.974	210.742	189.464	241.673	259.006	253.256	13.2316	37.4247	40	205.214	236.004	234.845	199.663	332.741	181.633	215.373	207.289	211.159	243.083	272.74	230.886	12.6359	41.9085	40	162.102	122.807	107.699	131.605	132.915	157.6	128.788	236.143	107.447	196.771	148.388	12.9984	41.1044	40	218.062	350.595	215.503	185.896	181.014	269.174	389.55	192.144
41	263.232	286.498	313.41	289.461	209.599	195.246	240.191	258.609	257.031	14.3243	40.5152	41	217.598	256.92	235.371	198.918	341.727	185.861	218.524	199.51	216.61	238.994	281.139	235.561	13.4506	44.6106	41	166.505	131.579	125.649	131.605	130.438	153.018	125	236.581	106.012	192.221	149.861	12.3709	39.1204	41	214.097	350.595	224.248	185.489	182.597	273.559	379.906	193.232
42	267.942	289.75	313.772	245.6	209.98	204.331	234.26	263.369	253.626	13.3609	37.7904	42	215.828	254.596	228.541	202.395	327.998	182.724	213.797	207.431	213.901	235.236	257.252	230.882	11.7555	38.9887	42	173.71	127.894	102.803	121.59	158.475	161.265	128.788	237.239	109.599	190.231	151.159	13.1581	41.6095	42	224.67	379.245	223.311	180.189	178.903	278.431	399.614	183.979
43	272.654	284.873	301.467	313.003	222.556	204.331	232.627	258.609	261.265	13.7238	38.8168	43	199.907	249.948	229.066	195.193	330.494	173.177	217.474	205.238	214.389	249.083	257.505	229.225	12.782	42.3931	43	172.509	127.894	111.37	128.345	158.475	174.093	117.424	221.233	111.572	188.809	151.172	11.8852	37.5843	43	221.145	357.879	217.377	179.374	181.542	264.789	382.841	194.865
44	252.632	289.625	308.344	302.138	224.08	188.249	235.743	258.609	257.427	14.651	41.4393	44	196.368	230.194	230.642	202.395	332.241	175.183	212.746	197.459	215.368	247.038	259.869	227.228	12.7993	42.4504	44	169.707	122.807	134.215	127.606	127.803	161.265	128.788	230.661	110.855	193.643	150.735	11.9657	37.8387	44	220.705	308.349	217.064	180.597	180.486	262.11	363.972	191.6
45	267.942	289.5	321.372	271.352	216.077	189.464	234.109	253.85	255.458	14.8061	41.8781	45	206.983	249.948	231.693	198.918	334.238	166.726	213.797	207.715	230.305	247.055	270.377	232.523	13.2721	44.0185	45	163.303	122.807	154.205	128.345	137.175	164.014	121.212	219.04	113.546	194.496	151.814	10.8705	34.3757	45	219.824	354.966	222.374	183.858	177.847	268.687	377.81	187.245
46	266.765	285.498	290.61	256.865	211.504	204.331	232.778	268.129	252.06	11.4925	32.5058	46	210.521	247.624	225.914	199.911	345.471	176.819	221.676	215.352	219.901	237.469	262.232	232.99	13.1964	43.7676	46	166.905	118.421	137.071	120.484	137.175	172.26	125	220.356	116.057	188.24	150.197	11.1407	35.2301	46	207.489	311.263	229.557	180.597	181.014	265.52	385.777	189.422
47	254.987	291	305.448	274.974	252.281	190.246	232.627	269.319	258.86	12.6962	35.9102	47	224.674	246.462	237.472	200.656	316.016	177.911	208.544	195.408	215.325	244.551	257.505	229.502	11.3483	37.6381	47	161.702	115.63	139.927	120.484	148.438	164.014	114.889	203.912	105.294	190.231	146.452	10.6041	33.5331	47	207.048	337.97	232.68	186.712	172.57	260.405	385.357	195.41
48	256.754	290.875	294.229	240.567	245.802	202.246	235.743	258.213	253.054	10.5693	29.8945	48	201.676	253.434	236.421	204.381	335.237	174.774	217.474	213.3	216.41	241.357	266.959	232.857	12.8627	42.6607	48	158.5	114.035	102.803	121.59	113.438	157.6	125	216.19	115.877	197.055	142.209	12.2803	38.8338	48	207.489	363.221	222.686	181.412	174.153	258.7	397.098	180.169
49	264.409	290.125	313.772	285.839	221.794	195.246	225.364	258.213	256.845	14.1813	40.1106	49	198.138	241.814	230.117	199.911	338.482	176.001	220.1	205.38	217.935	249.17	266.959	231.273	13.2492	43.9427	49	158.1	114.035	137.071	124.665	137.175	169.511	127.747	210.709	109.958	199.33	148.83	11.0137	34.8284	49	218.062	329.229	223.311	181.82	176.792	270.879	390.808	191.6
50	262.054	286.874	292.058	271.352	237.418	188.249	232.778	248.297	252.385	11.9188	33.7115	50	221.136	245.3	241.675	198.421	324.753	180.775	212.746	205.664	228.071	244.31	265.65	233.5	11.7094	38.8356	50	161.302	131.579	105.659	131.605	137.175	149.353	117.424	208.735	102.962	195.634	144.143	11.2543	35.5893	50	219.383	290.382	223.311	187.119	168.876	268.931	392.066	186.701
51	266.765	293.751	282.648	255.054	259.521	204.331	217.951	246.71	253.342	10.7002	30.2647	51	208.752	262.73	234.845	203.388	345.721	178.729	219.05	211.391	215.981	224.756	265.904	233.75	13.5174	44.832	51	161.302	118.89	97.092	128.345	127.803	161.265	128.788	219.917	107.447	196.771	144.762	12.4925	39.5048	51	218.502	274.843	222.408	181.82	170.459	271.854	387.454	182.346
52	258.521	300.504	293.867	202.537	235.894	190.246	221.218	249.09	243.985	14.0849	39.8382	52	196.369	267.378	230.642	196.931	355.955	173.137	210.645	185.437	212.227	233.219	261.177	229.374	15.4845	51.3563	52	167.306	115.63	114.226	124.665	112.466	146.604	117.424	212.024	109.958	187.103	140.741	11.4763	36.2914	52	218.943	342.826	219.459	179.781	177.847	267.713	385.357	188.878
53	260.287	296.503	300.382	262.298	236.656	188.249	225.515	255.436	253.166	13.0234	36.8356	53	214.059	268.54	233.269	201.153	322.007	171.227	216.423	221.221	214.305	229.093	259.869	231.924	12.0082	39.8268	53	169.307	131.579	108.515	124.665	112.466	149.353	114.889	195.326	105.294	187.387	139.878	10.6162	33.5714	53	224.229	303.979	228.308	185.489	173.625	272.585	394.163	188.334
54	267.354	300.754	296.763	258.676	251.9	189.464	221.946	257.023	255.485	12.9581	36.651	54	196.369	255.758	239.574	196.931	343.474	174.188	222.727	205.38	215.468	240.948	261.177	231.999	13.7805	45.7048	54	157.7	122.807	137.071	121.59	132.915	154.851	125	189.96	110.855	191.368	144.412	8.97009	28.3659	54	220.264	307.378	232.437	171.628	175.209	266.982	374.455	191.055
55	263.82	297.628	294.591	264.109	234.751	204.331	222.057	272.888	256.772	11.8795	33.6003	55	224.674	248.786	231.693	202.643	326.75	170.096	213.272	201.42	212.078	235.583	270.63	230.693	12.4959	41.4441	55	170.508	131.579	114.226	124.665	130.438	163.097	121.212	196.041	114.801	184.828	145.14	9.66094	30.5506	55	217.621	314.662	242.466	190.788	174.153	262.841	394.163	190.511
56	270.887	300.254	288.439	300.327	244.659	190.246	225.062	259.403	259.91	13.6903	38.7221	56	224.674	253.434	231.693	202.146	338.482	178.962	224.828	217.545	219.662	247.783	267.212	236.947	12.5003	41.4587	56	171.308	122.807	128.504	127.606	132.915	161.265	113.636	194.968	101.169	182.269	143.645	9.96784	31.5211	56	216.3	306.407	228.013	176.928	166.237	264.546	389.97	177.992
57	264.409	293.126	305.81	274.974	215.696	190.246	226.847	261.386	254.062	14.0706	39.7976	57	214.06	262.73	240.624	206.865	326.75	176.643	198.653	209.482	223.784	232.817	269.575	232.908	12.4697	41.3575	57	165.304	127.894	117.082	121.59	122.691	149.353	127.841	187.098	107.806	189.094	141.575	9.32502	29.4883	57	225.11	272.901	232.142	178.151	169.931	270.879	405.485	187.245
58	256.165	301.505	294.953	284.029	234.751	189.464	223.296	260.593	255.594	13.5894	38.4365	58	219.367	256.92	228.541	204.133	337.733	173.642	190.248	215.493	222.469	253.336	268.014	233.627	13.4786	44.7033	58	156.899	131.579	127.489	128.345	112.466	141.107	113.636	190.317	108.164	192.79	140.279	9.68079	30.6133	58	218.943	311.263	234.797	179.374	167.293	285.495	398.776	190.511
59	262.054	296.127	299.296	303.949	229.034	202.246	219.889	263.369	259.496	13.8213	39.0927	59	214.059	267.378	231.168	201.153	318.013	173.31	198.127	195.408	211.579	231.137	269.322	228.241	12.6168	41.8451	59	159.701	118.421	117.082	133.489	122.691	146.604	113.636	189.602	112.649	188.24	140.212	9.42505	29.8046	59	221.586	349.624	219.459	178.151	170.987	284.764	395.84	176.903
60	269.12	297.378	305.448	300.327	229.797	202.246	223.296	263.766	261.422	13.8648	39.2155	60	194.599	256.92	236.947	206.12	324.503	174.537	210.209	203.187	216.359	245.192	257.505	229.644	12.3899	41.0926	60	164.904	131.579	130.439	128.345	122.691	138.969	127.841	189.244	111.034	189.378	143.442	8.78799	27.7901	60	227.313	318.061	223.293	178.558	170.459	274.29	395.421	186.701
61	259.698	297.253	292.058	222.457	201.596	190.244	224.631	259.799	243.467	14.1208	39.9398	61	203.445	261.568	232.218	204.381	333.49	176.31	211.785	201.42	217.775	243.69	258.56	231.331	12.8761	42.7052	61	156.899	118.421	117.082	124.665	112.678	154.851	114.889	188.708	100.63	189.947	137.877	10.2639	32.4573	61	221.145	332.143	217.984	178.558	163.071	283.546	371.52	180.713
62	255.576	302.005	293.867	227.89	205.026	202.246	222.558	253.056	245.278	13.3871	37.8643	62	192.83	262.73	233.794	202.146	338.981	170.309	195.501	203.329	211.176	237.79	261.177	228.16	14.121	46.8341	62	154.097	115.63	127.489	128.345	137.175	138.969	132.576	183.699	107.267	186.25	141.15	8.33737	26.3651	62	218.062	255.42	227.718	181.004	165.182	290.123	387.035	190.511
63	261.465	300.754	299.658	255.054	220.269	204.331	225.062	269.319	254.489	12.679	35.8616	63	210.521	249.948	232.218	200.656	324.254	170.855	201.279	199.51	216.752	245.636	265.904	228.867	12.604	41.8027	63	160.501	118.421	125.649	124.665	117.578	173.176	125	192.106	104.756	181.416	142.327	9.87355	31.2229	63	218.062	272.901	219.459	181.82	171.514	272.097	388.712	190.511
64	257.343	293.001	306.534	253.243	224.461	189.464	226.847	254.246	250.642	13.3479	37.7535	64	210.521	244.138	235.896	209.1	322.756	179.856	210.734	203.471	220.47	237.188	259.869	230.364	11.3926	37.785	64	157.299	131.579	111.37	118.474	132.915	161.265	114.889	189.244	104.397	174.023	139.546	9.21003	29.1247	64	219.383	250.564	230.963	178.558	163.071	278.187	397.098	186.157
65	258.52	298.003	303.639	207.97	205.407	202.246	223.882	255.436	244.388	14.4848	40.9691	65	203.445	249.829	229.591	201.401	339.73	171.946	203.38	205.238	208.521	244.04	267.212	229.485	13.7144	45.4856	65	162.903	127.894	142.782	115.474	130.438	152.102	121.212	175.65	104.397	185.397	141.825	8.45728	26.7443	65	223.788	261.247	211.789	182.227	164.126	280.38	402.969	188.878
66	247.921	298.629	288.801	218.836	205.026	204.331	223.629	269.715	244.611	13.2327	37.4279	66	199.907	217.293	237.997	208.851	323.754	168.809	208.108	189.539	213.546	256.022	258.814	225.695	12.7219	42.1937	66	148.894	140.489	137.071	128.345	127.803	169.511	117.424	185.846	113.904	178.857	144.814	8.03742	25.4165	66	216.3	265.132	234.207	177.335	170.459	275.751	387.873	183.979
67	256.754	297.128	306.172	245.999	201.977	195.246	225.364	250.677	247.415	14.2026	40.1711	67	208.752	230.075	234.845	207.858	332.491	165.126	208.108	211.675	224.692	252.904	254.087	230.056	12.6585	41.9836	67	154.898	122.807	114.226	118.474	117.578	154.851	114.889	184.594	110.855	187.672	138.084	9.47101	29.95	67	231.277	250.564	223.883	179.374	166.765	274.29	396.679	179.08
68	263.82	295.252	317.391	249.621	229.797	190.244	224.032	259.403	253.695	14.276	40.3785	68	192.831	250.991	230.117	203.636	322.007	173.815	213.886	211.391	221.352	261.136	244.38	229.595	12.0584	39.9931	68	156.099	127.894	131.36	124.665	112.466	161.265	132.576	175.292	108.523	180.563	141.07	8.06309	25.4977	68	222.467	231.626	230.668	183.858	169.931	282.085	398.356	183.435
69	247.332	297.628	298.934	227.89	216.458	204.331	217.951	266.939	247.183	13.1069	37.0718	69	222.905	239.371	233.269	201.153	344.722	174.906	204.431	203.329	214.626	265.053	251.724	232.317	13.625	45.1891	69	158.5	118.421	125.649	124.665	122.691	161.265	121.212	186.025	107.447	182.838	140.871	9.04267	28.5954	69	226.432	223.857	226.538	183.45	166.237	275.751	389.55	177.991
70	264.998	296.127	314.858	264.109	235.132	195.246	221.218	260.989	256.585	13.7449	38.8764	70	221.136	238.209	235.371	205.126	327.748	177.771	212.31	213.3	220.06	263.521	242.017	232.415	11.666	38.6919	70	150.895	122.807	134.215	118.474	130.438	182.339	117.424	192.464	107.626	187.672	144.435	10.1002	31.9396	70	218.062	229.198	228.603	174.482	161.487	263.571	396.679	181.802
71	259.698	297.378	313.772	247.81	215.696	195.246	225.515	270.905	253.253	14.3533	40.5974	71	199.907	241.695	245.353	204.133	335.237	173.679	219.665	201.42	211.702	243.74	254.087	230.056	12.8705	42.6866	71	160.501	122.807	105.659	121.59	132.915	182.339	127.841	180.658	104.756	179.994	141.906	9.82245	31.0613	71	232.599	234.054	226.243	176.928	164.654	270.636	397.937	181.258
72	253.809	295.502	303.277	236.945	204.264	202.246	221.946	253.056	246.381	13.468	38.0932	72	210.521	259.125	239.573	207.113	317.764	176.134	217.038	229.425	227.715	259.865	249.107	235.762	11.0834	36.7594	72	153.697	115.63	128.504	115.474	127.803	157.6	113.636	179.585	106.55	185.113	138.359	9.04488	28.6024	72	234.361	240.367	231.258	178.151	162.015	259.43	388.293	176.903
73	257.343	287.999	290.972	249.621	212.266	189.464	222.057	262.576	246.537	12.7533	36.0717	73	205.214	254.477	237.997	199.663	315.767	170.815	221.766	219.312	214.115	254.05	250.415	231.236	11.4691	38.0386	73	149.294	131.579	134.215	128.345	120.438	161.265	132.576	184.951	107.088	178.004	142.775	7.94961	25.1389	73	224.229	207.832	218.279	180.189	158.321	256.507	373.197	181.257
74	251.454	290.625	305.448	273.163	202.739	204.331	225.062	261.783	251.826	13.5731	38.3906	74	226.443	253.315	237.997	205.871	329.246	168.905	208.633	201.278	207.853	262.509	244.634	231.517	12.7216	42.1929	74	148.494	118.89	119.937	131.605	127.803	179.59	121.212	181.195	111.034	185.397	142.516	9.18546	29.047	74	235.683	226.77	230.373	183.858	156.21	255.776	374.455	172.004
75	264.998	302.63	304.363	227.89	205.026	195.246	226.847	262.972	248.747	14.7306	41.6644	75	226.443	245.181	238.523	211.831	339.231	174.497	220.715	193.499	209.477	250.526	244.38	232.21	12.8176	42.511	75	153.697	122.807	107.699	124.665	122.691	161.265	125	180.122	107.267	183.122	138.833	8.98496	28.4129	75	225.551	254.449	216.214	180.597	151.461	262.841	384.519	179.625
76	257.343	295.252	294.953	222.457	214.553	204.331	223.296	265.352	247.192	12.7538	36.0732	76	210.521	241.695	232.218	200.905	329.496	174.497	222.816	213.3	211.012	253.628	251.724	231.074	12.0816	40.0701	76	152.096	127.894	101.172	124.665	117.578	153.018	132.576	168.138	104.039	187.387	136.856	8.81583	27.8781	76	230.837	229.198	235.387	178.558	153.044	258.456	412.613	174.182
77	254.987	289.875	307.258	226.079	203.882	189.464	219.889	269.715	245.144	14.8587	42.0267	77	233.519	218.455	231.693	203.388	325.003	180.089	206.532	217.261	215.499	261.928	250.415	231.253	11.5662	38.3608	77	148.093	131.579	102.803	128.345	112.466	165.846	121.212	183.163	112.649	185.113	139.127	9.47136	29.9511	77	233.921	185.981	236.567	182.227	155.682	254.315	370.681	181.802
78	257.932	291.5	313.41	238.756	238.562	204.331	223.296	263.766	253.944	12.6259	35.7114	78	229.981	248.667	242.726	207.858	332.99	179.271	214.412	205.664	223.668	256.458	249.36	235.55	11.982	39.7397	78	144.491	129.084	79.9582	127.606	127.803	152.102	125	177.797	109.241	162.08	133.516	8.73056	27.6085	78	229.956	224.828	240.402	181.82	155.155	269.174	384.938	177.991
79	260.876	293.501	318.839	253.243	220.65	195.246	224.631	263.766	253.844	14.2266	40.2389	79	224.674	246.343	242.726	203.14	320.26	177.361	221.766	221.363	216.617	242.033	259.869	234.196	10.9799	36.4161	79	153.297	122.807	97.092	121.59	137.175	146.604	121.212	171.357	110.676	185.681	136.749	8.74409	27.6512	79	230.397	212.202	232.142	172.851	154.099	264.059	394.582	172.549
80	245.565	295.002	305.448	222.457	220.65	202.246	222.558	266.146	247.509	13.3523	37.766	80	215.829	241.695	246.929	205.375	335.487	170.542	199.703	199.652	226.342	260.983	256.45	232.635	13.2558	43.9644	80	150.495	127.894	154.205	121.59	137.175	164.014	125	177.439	114.263	186.819	145.889	7.82891	24.7572	80	234.361	237.939	228.308	185.081	151.988	263.571	388.293	179.08
81	258.52	299.379	283.01	249.621	227.891	189.464	217.951	276.062	250.237	12.9973	36.7618	81	203.445	248.667	247.98	204.878	340.229	182.135	220.715	207.289	216.136	260.458	249.36	234.663	12.9007	42.7868	81	150.495	118.421	137.071	128.345	112.466	172.26	125	170.642	104.397	172.032	139.113	8.14365	25.7525	81	222.908	211.231	235.387	177.335	153.571	271.938	389.131	171.46
82	258.521	300.129	301.829	231.512	211.123	195.246	212.179	271.302	247.73	14.6177	41.3452	82	221.136	242.857	248.505	204.878	312.022	173.815	227.019	195.266	208.18	246.843	268.267	231.708	11.4849	38.091	82	142.09	129.084	139.927	131.605	112.466	164.014	117.424	171.178	103.68	187.956	139.942	8.58255	27.1404	82	231.277	252.021	231.257	176.52	156.738	275.451	380.326	178.536
83	251.454	294.127	311.239	236.945	229.415	202.246	215.446	277.648	252.315	13.6862	38.7106	83	217.598	256.801	245.353	204.381	337.733	176.543	210.209	201.42	213.79	255.985	264.595	234.946	13.2468	43.9345	83	151.296	112.89	102.803	128.345	137.175	163.097	121.212	176.902	107.626	183.691	138.504	9.17288	29.0072	83	227.313	226.77	238.632	178.151	147.239	273.343	387.873	183.435
84	249.687	286.248	315.944	193.483	216.84	189.464	219.743	277.252	243.582	16.3389	46.2133	84	208.752	246.343	235.37	203.14	350.713	170.542	217.038	187.63	218.761	256.028	260.122	232.222	14.5214	48.1621	84	136.486	129.084	137.071	131.605	137.175	169.511	125	185.846	106.371	187.103	144.525	8.53824	27.0003	84	229.956	223.857	234.502	185.896	153.571	270.298	379.487	177.992
85	254.398	288.749	316.667	262.298	227.129	189.464	216.175	261.783	252.083	14.363	40.6248	85	235.289	245.181	231.693	205.126	319.012	169.587	212.195	199.51	214.04	251.02	263.54	231.472	11.8694	39.3664	85	149.294	122.807	105.659	128.345	127.803	149.353	125	185.488	114.442	182.553	139.074	8.61714	27.2498	85	232.159	208.318	221.523	179.781	151.461	281.073	374.455	170.915
86	251.454	291.5	296.763	284.029	205.026	204.331	216.286	278.441	253.479	14.032	39.6884	86	228.212	246.343	230.642	202.891	328.248	183.499	219.024	201.278	208.185	255.485	268.267	233.825	12.1336	40.2427	86	151.696	118.421	97.092	131.605	112.466	141.107	121.212	180.301	104.577	177.435	133.591	9.12623	28.8597	86	232.599	253.963	235.977	179.781	149.877	270.064	393.744	169.827
87	254.987	295.377	320.648	175.374	210.361	195.246	219.291	275.665	243.369	18.1577	51.3579	87	208.752	248.667	233.269	202.395	317.264	166.587	210.619	213.3	209.986	236.184	264.849	228.352	11.8655	39.3534	87	151.296	114.89	114.226	121.59	122.691	146.604	128.788	175.471	109.779	182.838	136.817	8.2567	26.11	87	231.718	203.462	226.243	180.597	143.544	274.749	374.455	182.891
88	249.098	294.252	297.486	227.89	215.315	204.331	221.075	274.078	247.941	12.9381	36.5943	88	237.058	254.477	240.099	205.623	324.503	173.952	227.429	215.635	225.095	257.461	260.156	238.317	11.5038	38.1537	88	142.89	131.579	108.515	124.665	132.915	138.969	121.212	183.163	110.676	184.828	137.941	8.43283	26.6669	88	235.242	259.79	235.387	183.45	156.738	273.109	369.004	171.46
89	254.398	294.752	314.858	226.079	217.221	189.464	217.525	268.525	247.853	15.1781	42.93	89	222.905	248.667	237.997	200.408	351.462	178.589	213.771	223.272	219.919	250.174	255.395	236.596	13.3886	44.4051	89	147.693	112.89	134.215	115.474	130.438	149.353	113.636	186.561	111.034	181.132	138.243	8.80085	27.8307	89	232.599	212.688	231.847	178.151	147.239	274.983	401.711	171.46
90	253.809	289.5	317.029	285.839	239.705	195.246	214.117	278.441	259.211	14.5614	41.1857	90	210.521	256.801	244.827	203.885	355.206	174.088	224.802	203.329	211.87	254.458	249.36	235.377	14.3097	47.4599	90	149.694	127.894	91.3808	118.474	112.466	149.353	125	183.878	106.191	176.866	134.12	9.55686	30.2214	90	236.123	202.005	226.538	173.259	146.711	260.695	382.841	173.093
91	247.332	292.626	306.172	231.512	229.034	190.244	217.525	289.151	250.449	14.588	41.2612	91	215.828	252.153	244.302	201.153	344.223	169.314	196.961	201.42	208.134	249.986	242.27	229.613	13.9456	46.2524	91	150.495	127.894	128.504	118.474	132.915	169.511	117.424	181.732	107.985	185.681	142.062	8.87806	28.0749	91	235.683	259.304	219.459	178.966	148.822	265.145	392.905	175.815
92	260.876	293.751	300.02	242.377	221.794	202.246	218.859	264.162	250.511	12.5619	35.5303	92	229.981	245.181	253.759	198.67	332.241	181.317	221.65	205.38	210.319	260.565	243.325	234.763	12.2569	40.6514	92	143.291	114.89	117.082	128.345	117.578	146.604	125	180.837	109.061	172.317	135.501	7.84615	24.8117	92	230.397	258.819	228.603	183.043	149.877	259.524	385.777	175.814
93	254.987	286.999	302.553	197.105	204.645	195.246	216.786	279.235	242.194	15.5144	43.8813	93	199.907	238.209	246.929	197.428	333.739	165.905	206.826	201.703	220.149	252.725	240.962	227.68	13.2125	43.8209	93	152.897	127.894	117.082	131.605	132.915	141.107	117.424	184.951	110.317	180.847	139.704	8.19148	25.9037	93	228.634	204.433	224.768	178.966	151.461	270.533	394.163	182.346
94	254.987	281.871	317.029	222.457	225.224	202.246	219.291	274.475	249.698	13.8408	39.1477	94	219.367	263.773	255.86	204.63	328.497	166.723	210.503	195.55	210.21	250.498	255.395	232.819	13.2143	43.827	94	144.091	114.89	137.071	127.606	122.691	146.604	128.788	182.089	106.55	178.288	138.867	7.90354	24.9932	94	232.159	261.247	230.373	187.935	146.711	263.037	395.84	169.282
95	244.387	287.624	317.391	198.915	229.034	204.331	221.075	272.492	246.906	14.8741	42.0704	95	228.212	261.449	241.15	197.18	322.257	172.997	211.554	205.238	202.572	252.778	250.669	231.46	12.2781	40.7218	95	141.69	115.63	97.092	131.605	127.803	138.969	121.212	181.911	107.088	174.876	133.787	8.61601	27.2462	95	229.956	241.338	230.668	181.004	153.571	274.046	381.584	169.283
96	245.565	286.498	321.01	204.348	211.885	190.244	218.11	273.285	243.868	16.235	45.9196	96	212.29	262.611	251.657	202.891	341.228	171.497	212.605	201.42	205.48	246.287	226.715	230.426	13.6082	45.1331	96	150.495	118.421	117.082	121.59	127.803	156.683	121.212	181.195	107.088	169.473	137.104	8.01744	25.3534	96	231.718	245.222	219.754	181.004	145.655	272.172	391.647	169.827
97	251.454	288.874	313.772	226.079	181.779	190.244	217.857	275.268	243.166	16.7307	47.3216	97	196.369	253.315	255.86	198.918	336.984	180.226	209.453	201.42	214.673	244.53	241.215	230.269	13.1573	43.6379	97	144.891	118.421	117.082	131.605	132.915	173.176	125	186.382	98.8367	165.492	139.38	8.78947	27.7947	97	229.075	231.14	220.639	181.412	146.183	262.803	381.164	167.65
98	252.632	285.748	321.01	204.348	184.828	195.246	219.291	280.821	242.991	17.5034	49.5071	98	206.983	259.125	253.759	199.166	346.719	169.042	213.13	187.63	211.03	249.302	247.25	231.194	14.5623	48.2978	98	149.294	131.579	117.082	128.345	122.691	175.925	132.576	174.756	109.061	167.767	140.908	7.74002	24.4761	98	234.802	246.194	225.653	178.966	153.044	265.614	382.422	170.371
99	249.687	286.498	313.772	233.323	200.072	190.244	218.11	278.045	246.219	15.4862	43.8015	99	191.061	240.533	254.81	205.375	330.494	172.997	217.858	203.613	217.719	253.018	237.797	229.57	12.7139	42.1671	99	146.893	122.807	117.082	131.605	128.433	152.102	121.212	177.975	112.469	159.521	137.01	6.71964	21.2494	99	227.753	244.737	219.164	181.004	148.294	263.272	365.649	170.916
100	259.698	294.377	314.134	207.97	205.026	195.246	212.179	268.525	244.644	16.0956	45.5252	100	212.29	256.801	257.436	200.905	348.467	176.952	217.858	203.329	212.855	247.242	229.399	233.049	13.7602	45.6375	100	144.891	127.894	117.082	121.59	132.915	169.511	117.424	186.919	110.137	161.796	139.016	8.18127	25.8714	100	231.718	223.371	223.588	184.266	150.405	261.866	387.035	166.561
101	247.921	291.125	310.877	177.184	217.983	204.331	215.446	285.581	243.806	16.8859	47.7606	101	203.445	268.421	250.607	199.166	335.736	169.042	225.737	207.147	212.995	261.981	228.09	232.942	13.5558	44.9595	101	140.088	127.894	117.082	127.606	127.803	152.102	121.212	184.415	102.783	169.189	137.017	7.8842	24.932	101	228.194	212.688	215.329	178.151	151.461	273.343	390.389	173.093
102	240.265	288.624	314.858	211.592	208.074	195.246	219.743	278.045	244.556	15.5201	43.8975	102	206.983	256.801	256.911	198.421	338.482	179.68	204.725	205.38	212.019	251.157	231.762	231.12	13.2374	43.9034	102	139.688	118.421	114.226	124.665	128.433	152.102	128.788	185.309	101.886	173.739	136.726	8.37181	26.474	102	237.885	243.766	218.574	181.004	154.099	273.109	393.744	167.105
103	248.509	281.621	328.61	159.075	206.931	202.246	216.786	278.045	240.228	19.2308	54.3929	103	214.059	249.829	257.436	203.388	328.497	169.724	223.111	223.272	219.513	256.825	240.16	235.074	12.1302	40.2312	103	139.288	129.084	125.649	128.345	132.915	161.265	121.212	180.122	101.169	168.62	138.767	7.62918	24.1256	103	225.551	291.353	222.703	183.043	153.044	291.829	407.162	168.738
104	252.632	291.125	321.01	240.567	205.407	204.331	219.291	278.838	251.65	15.0338	42.5219	104	208.752	267.259	246.403	200.16	339.73	175.043	204.61	207.431	217.824	258.869	237.544	233.057	13.5345	44.8888	104	140.489	100.877	111.37	115.474	122.691	182.339	117.424	179.943	108.344	163.218	134.217	9.63563	30.4705	104	235.242	256.391	226.243	179.374	149.35	287.444	402.13	171.46
105	249.687	292.501	319.201	207.97	206.55	195.246	221.075	282.408	246.83	16.3958	46.3743	105	201.676	237.047	255.86	201.401	329.02	183.499	206.711	197.317	209.667	267.678	237.797	229.789	12.7243	42.2017	105	140.489	118.421	142.782	118.474	130.438	173.176	132.576	181.374	108.523	164.071	141.032	7.78572	24.6206	105	230.397	201.034	238.632	179.781	155.682	278.431	394.163	170.371
106	250.865	286.373	308.705	226.079	229.797	190.244	218.11	266.542	247.089	13.7218	38.8112	106	205.214	261.449	249.03	197.676	327.118	178.998	215.116	207.431	219.095	243.99	237.544	231.151	12.1099	40.1639	106	133.684	114.89	128.504	118.474	127.803	157.6	128.788	186.74	110.855	171.179	137.852	8.03479	25.4082	106	237.445	227.256	234.502	175.705	152.516	272.828	403.388	167.105
107	252.632	291.125	307.982	206.159	208.456	190.244	217.857	274.078	243.567	15.5613	44.0141	107	201.676	255.639	251.657	198.918	319.986	173.542	209.863	195.408	211.795	238.742	238.852	226.916	12.1219	40.2038	107	142.09	105.263	114.226	128.345	127.803	173.176	132.576	181.374	115.698	169.189	138.974	8.4719	26.7905	107	234.361	241.338	221.523	175.297	149.35	281.11	398.356	164.928
108	253.22	286.999	321.01	245.999	217.221	202.246	219.291	280.425	253.301	14.3764	40.6626	108	173.371	264.935	254.284	206.616	315.232	168.496	215.116	211.108	212.754	250.515	234.125	227.868	12.7475	42.2786	108	141.689	122.807	131.36	131.605	137.175	179.59	117.424	189.602	100.272	162.649	141.417	8.85701	28.0083	108	237.004	234.054	235.977	176.928	149.35	275.995	401.711	161.118
109	252.632	285.373	320.287	206.159	207.312	195.246	218.11	278.441	245.445	16.1469	45.6704	109	196.369	277.717	251.132	202.643	339.243	171.633	224.571	193.499	216.776	241.45	238.852	232.171	14.0253	46.5165	109	138.888	114.89	117.082	128.345	132.915	146.604	125	175.292	106.371	174.876	136.026	7.48818	23.6797	109	230.397	221.429	226.243	176.928	148.294	282.816	397.937	164.928
110	253.809	284.372	315.944	198.915	201.215	204.331	212.179	277.252	243.502	16.0663	45.4424	110	196.369	239.371	242.2	202.891	310.239	174.906	231.4	211.391	222.21	231.362	236.742	227.189	10.421	34.5624	110	137.287	112.095	134.215	131.605	112.466	169.511	132.576	181.911	105.474	169.473	138.661	8.41523	26.6113	110	229.515	256.877	235.387	170.405	151.988	274.777	374.874	161.118
111	253.809	288.749	327.163	182.617	213.029	204.331	215.446	287.168	246.539	17.8998	50.6284	111	178.678	270.745	247.454	199.415	332.824	179.271	230.349	203.471	213.852	228.103	229.399	228.505	13.3568	44.2996	111	128.881	110.994	105.659	128.345	117.578	165.846	132.576	178.87	110.496	165.492	134.474	8.32118	26.3139	111	226.432	256.391	231.847	174.889	146.711	277.213	396.679	161.662
112	251.454	293.376	311.601	189.861	228.653	195.246	219.743	270.509	245.055	15.7486	44.5439	112	206.983	278.879	251.132	195.441	321.888	171.087	237.704	197.317	214.818	234.197	234.125	231.234	12.7386	42.249	112	143.291	105.263	79.9582	131.605	137.175	157.6	125	184.057	105.653	167.767	133.737	9.96393	31.5087	112	233.48	238.424	226.538	172.851	149.35	272.584	402.969	161.662
113	252.043	283.372	318.839	190.101	206.55	202.246	209.674	276.458	242.41	16.6252	47.0232	113	182.216	260.287	247.454	199.911	322.839	176.27	222.47	185.578	211.966	237.233	234.125	225.486	12.8336	42.5641	113	147.293	114.89	48.546	127.606	117.578	146.604	128.788	184.772	106.012	159.521	128.161	11.553	36.5337	113	235.683	211.231	219.459	181.412	139.85	262.597	382.003	160.029
114	250.865	283.122	326.801	182.617	229.797	190.244	213.972	274.475	243.986	17.4864	49.459	114	233.52	267.259	249.556	199.663	330.447	174.906	215	207.715	222.9	235.661	230.707	233.394	12.2497	40.6277	114	135.285	108.489	119.937	127.606	132.915	164.014	125	179.049	104.397	161.796	135.849	7.8303	24.7616	114	230.397	253.477	228.603	178.966	143.544	266.251	384.938	157.852
115	250.865	285.373	299.658	186.239	208.456	202.246	210.403	271.699	239.367	15.1916	42.9685	115	199.907	250.991	247.454	198.173	319.986	175.725	226.031	207.431	211.627	246.101	230.707	228.558	11.602	38.4795	115	135.686	127.894	107.699	131.605	112.466	172.26	125	183.52	104.218	169.189	136.954	8.96685	28.3557	115	228.634	250.078	224.768	181.004	146.711	266.495	403.388	168.738
116	245.565	279.87	309.067	236.945	217.221	204.331	210.514	265.352	246.108	12.9595	36.655	116	194.599	273.069	241.15	198.67	315.232	171.906	221.829	211.249	208.862	223.83	233.07	226.679	11.9258	39.5535	116	137.287	118.421	101.172	128.345	112.466	164.014	117.424	184.951	96.3254	173.739	133.414	9.77162	30.9006	116	232.159	215.602	230.373	184.266	144.6	259.187	397.098	161.662
117	250.865	294.377	306.534	151.832	207.312	202.246	213.519	265.352	236.505	18.4272	52.1199	117	185.754	270.745	243.777	199.911	339.243	169.411	230.234	205.38	215.499	252.782	240.16	232.081	14.0483	46.593	117	133.284	114.89	102.803	124.665	132.915	163.097	121.212	177.081	104.039	168.62	134.261	8.42548	26.6437	117	229.956	190.351	230.668	178.151	146.183	264.546	387.873	155.675
118	249.687	285.248	289.525	224.268	201.215	195.246	215.303	270.509	241.375	13.2787	37.5578	118	205.214	276.555	235.37	194.696	310.239	169.956	211.323	201.42	215.07	232.56	235.434	226.167	11.8182	39.1964	118	133.284	129.084	79.9582	121.59	130.438	169.511	125	183.52	104.936	163.218	134.054	9.77787	30.9203	118	231.718	217.544	219.754	181.004	144.072	280.623	395.002	157.852
119	253.22	288.624	299.296	195.294	207.312	190.244	211.753	276.458	240.275	15.655	44.279	119	194.599	253.315	257.962	196.683	332.824	168.729	227.607	213.584	220.916	234.067	228.344	229.875	12.9307	42.8864	119	139.288	100.877	97.092	131.605	130.438	161.265	128.788	184.951	99.1954	164.071	133.757	9.4206	29.7905	119	229.075	217.058	220.639	183.043	141.433	270.879	403.388	159.485
120	253.22	281.621	307.62	236.945	201.215	202.246	208.345	265.352	244.571	13.949	39.4537	120	175.14	276.555	240.315	194.448	321.888	163.546	225.506	195.55	222.043	235.02	227.035	225.186	13.637	45.2287	120	133.284	114.89	134.215	124.665	132.915	157.6	117.424	177.081	101.169	171.179	136.442	7.84737	24.8156	120	234.802	188.409	220.639	179.374	144.6	274.777	397.098	152.953
[truncated: 5 more columns]
