# Supplementary material for: LTP and memory impairment caused by extracellular Aβ and Tau oligomers is APP-dependent
Source: eLife. 2017 Jul 11;6:e26991. doi: 10.7554/eLife.26991 (PMC5529106; doi:10.7554/eLife.26991)
Supplement: Figure 5—source data 4. — DOI: http://dx.doi.org/10.7554/eLife.26991.020 [file elife-26991-fig5-data4.xlsx]

## Sheet: Fig 5D
Figure 5D
	WT Vehicle
	fEPSP slope
Stim intensity	Slice 1	Slice 2	Slice 3	Slice 4	Slice 5	Slice 6	Slice 7	Slice 8	Slice 9	Slice 10	Slice 11	Slice 12	Slice 13	Slice 14	Slice 15	Slice 16	Slice 17	Slice 18	Slice 19	Slice 20	Slice 21	Slice 22	Slice 23	Slice 24	AVG	ERROR	STDEV
5	0.0669244	0.281241	0.0920371	0.454772	0.297249	0.356132	0.177229	0.744305	0.52986	0.327928	0.175254	0.337811	0.433035	0.282523	0.368458	0.277477	0.51964	0.388468	0.445143	0.439079	0.333939	0.467326	0.205011	0.453656	0.352271	0.0308106	0.15094
7	0.762939	2.48928	0.368149	2.05246	1.33432	0.762196	0.201998	0.821908	0.568012	0.441441	0.143819	0.365321	0.476312	0.449009	0.517682	0.302703	0.691171	0.54991	0.46824	0.580218	0.379702	0.675308	0.233663	0.575334	0.675462	0.1129	0.553094
9	2.65021	2.30976	0.673324	3.33898	2.7479	0.845284	0.238874	0.764291	0.690302	0.466667	0.241048	0.84669	0.630657	0.595315	0.677071	0.514595	0.681081	0.494414	0.572134	0.652675	0.485464	1.16832	0.276319	0.740243	0.970901	0.174845	0.856564
11	2.9246	2.3696	0.707233	3.9457	3.07157	0.835913	0.403997	2.12062	0.836739	0.605405	0.363964	1.4148	0.672095	0.701261	0.824455	0.711351	0.923243	0.640721	0.669068	0.767022	0.53895	1.22583	0.397227	0.819238	1.18711	0.197172	0.965944
13	3.1053	2.57305	0.789582	3.8895	3.26313	0.910888	0.719927	2.09325	0.93764	0.807207	0.565132	1.60624	0.775877	0.847568	0.983733	0.887928	0.988829	0.761802	0.838435	0.900766	0.636995	1.1099	0.832781	0.906485	1.32216	0.191154	0.936459
15	2.99822	2.72265	0.804114	3.98524	3.79818	0.92026	0.504996	3.3326	0.974403	0.751712	0.911368	1.84458	0.955065	1.00901	1.01157	0.953514	1.09982	0.867748	0.962128	1.00828	0.654823	1.04756	0.584158	0.939818	1.44341	0.216313	1.05971
20	2.96476	2.45936	0.736297	4.1109	4.01617	2.48788	0.362164	3.15997	1.90277	1.01771	1.64176	2.88702	1.09249	1.10486	1.04305	1.33694	1.21586	1.83243	0.953249	1.05086	1.27346	1.14163	0.418936	1.01258	1.71763	0.216446	1.06037
25	3.05845	2.86028	0.79927	4.19467	4.1747	2.48788	0.706994	3.10991	1.91855	1.11765	1.76746	2.91591	1.16354	1.29153	1.18978	2.28144	1.96955	2.93838	1.05961	1.15655	1.3192	1.20206	0.817821	1.06008	1.94005	0.214414	1.05041
30	2.91122	3.44669	0.910683	4.05704	4.2936	2.36605	0.807993	4.08963	2.28271	1.03093	2.62801	3.12272	1.26658	1.36216	1.23227	2.40757	1.14018	2.95856	1.10715	1.21716	1.44399	1.29119	0.934652	1.10061	2.05872	0.231716	1.13517
35	2.83091	3.80572	0.939748	4.08098	4.10864	3.41696	1.11099	5.11465	2.21047	0.993335	3.71307	4.07385	1.36839	1.48829	1.22814	2.23099	1.07964	1.01405	1.15347	1.18069	0.797439	1.13075	1.28515	1.08135	2.14324	0.276578	1.35495
	BACE KO Vehicle
	fEPSP slope
Stim intensity	Slice 1	Slice 2	Slice 3	Slice 4	Slice 5	Slice 6	Slice 7	Slice 8	Slice 9	Slice 10	Slice 11	Slice 12	Slice 13	Slice 14	Slice 15	Slice 16	Slice 17	Slice 18	Slice 19	Slice 20	Slice 21	Slice 22	Slice 23	Slice 24	Slice 25	Slice 26	AVG	ERROR	STDEV
5	0.0130074	0.114621	0.455402	0.491849	0.0476538	0.439295	0.175641	0.328773	0.0219146	0.41778	0.174586	0.316341	0.368085	0.323977	0.432073	0.0242231	0.137538	0.780068	0.290249	0.484124	0.506002	0.781219	0.18501	0.170109	0.110572	0.215614	0.30022	0.0415272	0.211748
7	0.708954	0.981434	1.61359	0.617672	0.211528	1.61374	0.878204	0.308225	0.154831	0.499248	0.0698341	0.76294	0.903481	0.480507	0.486504	0.171142	0.420708	0.666628	0.421552	1.35375	1.86659	0.166103	0.101922	0.314702	0.467799	0.704889	0.651787	0.0965765	0.492446
9	0.982129	1.08173	1.83285	0.686302	0.257621	2.09338	1.09775	0.420895	0.23582	0.675311	0.366629	1.27777	1.36526	0.567898	0.994413	0.260662	0.776693	0.814296	0.0642449	2.45647	1.73728	0.180892	0.191755	0.671931	0.901579	1.29368	0.895586	0.122752	0.625915
11	0.891072	1.18918	1.52363	0.972261	0.269001	2.39371	1.24412	0.592814	0.256305	0.770575	0.675064	1.30878	1.44557	0.624242	1.22368	0.283305	0.995138	0.898936	1.64474	2.77025	1.85534	0.189805	0.256277	0.756986	0.910084	0.97026	1.03504	0.125709	0.640994
13	0.975626	1.16053	1.90032	0.720616	0.451931	2.18751	1.27705	0.758506	0.461446	0.930448	0.60523	1.14131	1.47903	1.00456	3.49916	0.310161	1.12459	0.911992	1.6793	2.92266	1.74852	0.20061	0.27793	0.84204	0.833536	1.25222	1.17911	0.153757	0.784008
15	0.852046	1.16769	2.01277	0.937947	0.48536	2.59543	1.28071	0.903997	0.982408	0.94712	0.517937	1.19093	1.64634	1.30037	4.46869	0.333331	1.22976	1.18962	1.76914	3.34403	1.9453	0.21848	0.29159	0.84204	0.808019	1.31027	1.32967	0.187072	0.953885
20	1.03416	1.09605	1.90032	0.892194	0.496028	2.50129	1.15264	2.18379	1.16388	1.04208	0.616868	1.03586	1.6798	1.11725	6.46869	0.408533	1.31876	1.93546	1.76913	3.35299	1.79912	0.293174	0.367011	1.07169	0.816524	1.39319	1.4964	0.24212	1.23458
25	0.904079	1.28231	1.6923	0.754932	0.59105	2.42957	1.2734	1.00999	1.28488	1.18807	0.744898	1.06687	1.42549	1.30741	7.79871	0.542287	1.6262	1.29422	1.94881	3.74746	1.87783	0.37125	0.463214	1.06318	0.739976	1.71661	1.54404	0.285762	1.4571
30	1.04067	1.33962	2.05212	0.926508	0.595317	2.35785	1.37951	3.05971	1.31633	1.21737	0.832191	1.09789	1.19795	1.74968	7.44356	0.567298	1.77992	1.47265	1.66547	3.82814	1.99028	0.346825	0.458152	1.0972	0.791007	2.1976	1.68465	0.27843	1.41972
35	0.852048	1.31813	1.72041	0.937947	0.561888	2.61784	1.63931	2.95949	1.34253	1.16768	1.06497	1.26536	1.86719	2.26942	7.49275	0.59626	2.39481	1.60186	1.8075	3.53229	1.80474	0.259765	0.43963	1.06318	0.680437	2.04833	1.74253	0.278341	1.41927
