# Supplementary material for: LTP and memory impairment caused by extracellular Aβ and Tau oligomers is APP-dependent
Source: eLife. 2017 Jul 11;6:e26991. doi: 10.7554/eLife.26991 (PMC5529106; doi:10.7554/eLife.26991)
Supplement: Figure 5—source data 5. — DOI: http://dx.doi.org/10.7554/eLife.26991.021 [file elife-26991-fig5-data5.xlsx]

## Sheet: Fig 5E
Figure 5E
	WT VEHICLE											BACE KO VEHICLE													WT Abeta												BACE KO Abeta
	Slice 1	Slice 2	Slice 3	Slice 4	Slice 5	Slice 6	Slice 7	Slice 8	AVG	ERROR	STDEV		Slice 1	Slice 2	Slice 3	Slice 4	Slice 5	Slice 6	Slice 7	Slice 8	Slice 9	AVG	ERROR	STDEV		Slice 1	Slice 2	Slice 3	Slice 4	Slice 5	Slice 6	Slice 7	Slice 8	AVG	ERROR	STDEV		Slice 1	Slice 2	Slice 3	Slice 4	Slice 5	Slice 6	Slice 7	Slice 8	AVG	ERROR	STDEV
Baseline 1	92.2549	96.9615	103.55	104.926	79.87	79.8935	102.322	90.2391	93.7521	3.54553	10.0283	Baseline 1	110.847	100.842	97.0559	91.4288	95.1679	88.405	100.976	100.195	115.512	100.048	2.88644	8.65933	Baseline 1	97.302	105.2	99.8814	99.9842	105.042	97.5942	103.734	103.955	101.587	1.15721	3.27309	Baseline 1	101.09	100.751	102.761	91.7199	100.053	104.772	96.7411	94.3513	99.0299	1.55672	4.40308
2	94.9524	90.9676	85.6964	99.4587	81.6852	113.848	102.269	97.4727	95.7937	3.55857	10.0652	2	93.902	105.164	104.668	91.6812	100.177	100.227	88.9857	93.2903	95.5955	97.0767	1.91396	5.74187	2	100.954	100.286	89.8814	99.2833	94.5378	106.392	97.5104	93.5593	97.8005	1.81048	5.12082	2	98.063	91.312	101.473	106.091	94.9348	97.8862	94.8327	93.9333	97.3158	1.66096	4.6979
3	96.5325	99.4296	89.2671	119.527	102.258	102.863	104.018	110.991	103.111	3.22284	9.11557	3	95.3144	100.042	98.959	96.9802	101.945	99.0451	100.648	114.004	92.6084	99.9494	2	6.00001	3	103.302	100.468	112.848	99.7679	85.0359	89.3472	87.1369	98.4542	97.045	3.30488	9.3476	3	107.748	91.312	103.433	102.78	102.695	102.015	99.3182	94.3513	100.457	1.87586	5.30574
4	96.5709	104.013	96.4085	109.574	102.863	102.364	101.161	96.998	101.244	1.60459	4.53845	4	93.902	72.8874	109.109	100.48	94.284	104.037	97.2326	100.195	90.6164	95.8603	3.42774	10.2832	4	101.476	106.292	96.6706	102.629	105.042	102.68	97.9253	103.955	102.084	1.17703	3.32913	4	103.511	104.21	98.0597	90.8746	102.86	102.015	105.067	99.0532	100.706	1.64701	4.65845
5	93.3339	104.718	103.908	101.059	100.442	107.856	104.322	90.4764	100.765	2.11167	5.97271	5	110.847	109.331	104.034	105.391	107.248	108.897	86.6041	96.0521	112.524	104.548	2.75761	8.27282	5	95.2151	101.924	92.1812	101.53	100.84	89.3468	104.108	97.7175	97.8578	1.84023	5.20495	5	109.564	89.139	98.7313	101.019	91.1374	106.151	101.697	93.7244	98.8953	2.53883	7.18091
6	101.696	90.9676	94.6231	124.723	81.6852	97.8695	91.9629	104.232	98.4699	4.48881	12.6963	6	97.4323	100.042	100.228	96.9802	100.766	105.45	97.6461	106.907	107.545	101.444	1.38177	4.1453	6	103.302	93.7001	84.1004	99.7379	105.042	97.5942	93.361	100.388	97.1532	2.36816	6.69816	6	106.538	103.829	100.299	106.091	100.053	97.8862	102.887	99.0532	102.079	1.14717	3.2447
7	99.8558	94.2408	82.1257	98.9016	102.258	93.8748	101.161	104.469	97.1108	2.5037	7.08154	7	87.1576	100.756	93.2498	106.905	96.9357	96.7531	98.9451	98.8139	90.6164	96.6815	1.93698	5.81093	7	105.65	108.112	97.2692	92.4638	94.537	103.093	107.842	93.5585	100.316	2.32836	6.58559	7	116.828	94.3899	98.5075	103.132	95.2651	95.8113	96.7411	105.189	100.733	2.6723	7.55842
8	94.644	106.544	85.6964	99.3118	102.863	112.35	97.3099	97.4727	99.5239	2.83192	8.00987	8	99.5503	107.119	92.6155	101.186	111.373	101.102	96.78	98.8139	116.507	102.783	2.50538	7.51614	8	95.2151	101.924	93.3784	99.6333	105.042	105.856	102.116	103.955	100.89	1.60396	4.53669	8	95.6417	96.8523	103.433	94.256	101.539	95.8113	103.68	97.5904	98.6004	1.31793	3.72767
9	88.2086	102.603	114.262	101.771	100.442	91.3782	105.276	111.465	101.926	3.15239	8.9163	9	98.8447	90.0374	97.0559	104.803	101.945	98.2478	100.028	96.0521	90.6167	97.5144	1.61245	4.83735	9	101.737	105.2	113.431	101.489	104.437	100.495	104.108	98.5686	103.683	1.59795	4.51968	9	96.247	105.06	100.97	102.71	102.86	96.5005	95.3534	106.054	100.719	1.479	4.18326
10	103.315	107.892	91.0524	90.9442	100.442	90.8788	103.247	117.749	100.69	3.38193	9.56554	10	100.963	100.756	104.668	103.204	99.5895	99.8785	100.461	94.4791	95.5955	99.955	1.07894	3.23682	10	93.0021	93.9158	97.2692	99.9912	98.7395	105.608	98.8134	97.7175	98.1321	1.37057	3.87654	10	105.327	95.4159	99.6269	90.8746	100.053	99.9399	96.7411	103.86	98.9797	1.63662	4.62906
11	90.3666	107.892	114.262	99.1649	81.6852	79.8935	93.3671	110.991	97.2027	4.63117	13.0989	11	90.5025	95.0395	97.056	101.186	104.596	95.1224	106.956	98.814	89.6207	97.6548	1.96435	5.89304	11	101.476	93.9158	106.248	100.895	105.042	100.206	107.214	103.955	102.369	1.50765	4.26428	11	93.2203	110.19	97.1642	96.3693	100.053	102.704	101.102	106.054	100.857	1.93799	5.48146
12	109.789	101.898	101.764	86.6135	102.258	113.848	103.247	88.1124	100.941	3.33641	9.43678	12	97.4323	110.046	98.1355	97.4007	88.3913	105.858	103.708	101.576	105.553	100.9	2.12981	6.38943	12	101.998	96.4639	116.723	99.0437	102.61	98.5155	109.959	97.7175	102.879	2.47909	7.01193	12	95.9086	106.702	99.8507	103.978	101.539	97.8862	101.102	104.069	101.379	1.24556	3.52298
13	110.328	101.193	105.335	93.1096	117.99	102.863	101.161	97.4727	103.681	2.72283	7.70133	13	105.199	105.758	99.5934	99.083	98.9983	103.412	101.543	101.576	108.541	102.634	1.11318	3.33953	13	103.824	97.7379	100.963	99.5213	98.7395	100.206	103.734	97.7175	100.305	0.854961	2.41819	13	92.353	104.21	97.6119	110.74	100.218	93.7434	101.895	104.741	100.689	2.1494	6.07942
14	111.407	96.6089	105.335	84.4482	122.225	102.364	93.6076	97.9473	101.743	4.08015	11.5404	14	120.731	101.471	103.399	102.279	98.409	96.8125	109.338	98.814	95.5955	102.983	2.60685	7.82056	14	95.2151	95.9178	108.001	101.902	94.537	105.567	99.5851	93.5585	99.2854	1.91611	5.41958	14	97.4576	96.7134	100.746	93.4107	100.713	102.015	106.058	103.696	100.101	1.43981	4.0724
15	116.802	94.2408	126.759	86.4666	121.62	107.856	95.7012	83.9548	104.175	5.79457	16.3895	15	97.4323	100.756	100.228	101.102	100.177	96.7539	110.204	100.487	93.6038	100.083	1.51015	4.53046	15	100.432	99.012	91.2784	102.175	100.84	97.5942	82.9876	99.7966	96.7645	2.29195	6.48261	15	80.5085	109.985	97.3881	106.091	105.997	104.772	96.7411	94.3513	99.4792	3.33442	9.43117
Drugs 1	96.5709	98.0193	112.477	90.9442	125.856	107.856	101.161	132.928	108.226	5.22326	14.7736	Drugs 1	89.7965	96.4687	95.1529	90.756	103.123	100.227	112.802	79.4811	106.549	97.1507	3.31258	9.93774	Drugs 1	98.0846	97.7379	100.011	99.9912	98.7395	105.608	103.734	97.724	100.204	1.04045	2.94282	Drugs 1	95.9086	97.2247	97.3881	95.524	102.86	106.151	100.309	93.9333	98.6623	1.46319	4.13852
2	101.446	90.615	92.8378	119.527	130.696	102.863	104.018	83.9548	103.245	5.44876	15.4114	2	90.5025	104.329	100.228	97.3166	90.1591	99.0451	88.1196	114.004	110.532	99.3596	3.02409	9.07228	2	100.432	96.8279	113.431	99.2833	105.042	94.7629	97.5104	103.955	101.406	2.11302	5.97654	2	102.3	108.138	101.473	112.008	102.695	99.2577	96.9394	94.3513	102.145	2.02729	5.73403
3	96.5709	97.3141	105.335	126.603	79.87	93.8748	102.269	88.1124	98.7436	4.87653	13.7929	3	87.1576	97.1833	97.6904	102.784	102.829	104.037	88.9857	90.5285	91.6124	95.8674	2.16639	6.49917	3	100.693	95.5538	107	99.6333	98.7387	105.608	89.2116	98.5751	99.3768	1.97186	5.57728	3	101.695	112.858	95.3731	97.2147	102.365	97.1898	99.7147	99.0532	100.683	1.92767	5.45227
4	93.3339	93.4357	110.691	106.509	81.6852	97.8695	102.322	83.9548	96.2252	3.61797	10.2332	4	110.141	104.443	104.034	100.48	102.829	108.897	100.976	96.0521	108.541	104.044	1.53011	4.59033	4	98.3455	97.1919	104.248	102.175	105.042	89.3468	82.9876	103.962	97.9122	2.81119	7.95125	4	106.538	97.7393	102.761	102.78	98.5671	95.8113	99.7147	93.7244	99.7045	1.47338	4.16736
5	101.696	92.3779	103.908	124.723	79.87	91.3782	97.3099	97.9473	98.6514	4.55905	12.8949	5	89.666	87.8765	102.131	103.914	107.248	105.45	97.2326	116.574	114.516	102.734	3.29486	9.88458	5	98.0846	93.7001	107.146	101.489	94.5378	102.268	74.6888	93.5593	95.6842	3.44536	9.74494	5	99.8789	103.829	107.239	106.091	101.209	96.5005	98.3271	105.189	102.283	1.37525	3.8898
6	99.8558	94.2408	114.262	107.416	81.6852	102.364	102.269	97.4727	99.9456	3.39148	9.59255	6	95.4448	115.248	93.8842	102.873	94.284	96.7531	86.6041	108.288	91.6124	98.3324	2.97115	8.91344	6	101.476	104.108	113.431	102.629	102.61	103.134	82.9876	99.8032	101.272	2.98658	8.44732	6	100.484	94.3899	103.433	90.452	103.52	99.9399	100.111	104.8	99.6413	1.73758	4.91463
7	94.644	102.603	101.764	107.973	102.258	97.8695	105.276	90.9511	100.417	1.98257	5.60756	7	118.613	91.478	97.0559	101.485	99.5895	101.102	97.6461	94.4791	107.545	100.999	2.67524	8.02571	7	99.3889	108.112	106.595	101.489	98.7395	101.031	72.6141	97.724	98.2117	3.88248	10.9813	7	99.8789	89.139	98.0597	94.256	104.511	102.704	98.9218	97.5904	98.1326	1.69804	4.80277
8	88.2086	107.892	105.335	73.6215	102.863	113.848	104.322	69.9624	95.7565	5.82859	16.4857	8	87.1576	107.119	98.1355	97.4086	100.766	98.2478	98.9451	94.4791	129.452	101.301	3.93215	11.7964	8	93.0021	101.924	91.2784	99.2833	105.042	98.9691	70.5394	97.7175	94.7195	3.79333	10.7291	8	92.0097	105.06	98.7313	98.06	106.657	99.2577	101.697	104.278	100.719	1.67298	4.73191
9	103.315	107.892	105.335	86.6135	100.442	90.8788	102.269	125.932	102.835	4.17831	11.818	9	105.904	95.0395	98.3247	98.7097	96.9357	99.8785	96.78	119.336	111.528	102.493	2.72475	8.17424	9	95.2151	105.2	126.899	99.6333	102.61	115.464	82.9461	103.955	103.99	4.62652	13.0858	9	95.9086	95.4159	100.299	86.2252	101.704	93.7434	97.3358	103.86	96.8114	1.93784	5.48105
10	90.3666	101.898	126.759	93.1096	102.863	102.863	97.3099	104.944	102.514	3.91299	11.0676	10	112.259	110.046	103.399	101.919	111.373	95.1224	100.976	100.487	98.583	103.796	2.01757	6.0527	10	95.7368	101.014	109.839	99.9842	100.84	90.7216	78.8382	100.395	97.1711	3.23697	9.15555	10	98.063	110.19	98.5075	106.936	102.034	99.2577	99.7147	105.189	102.487	1.58204	4.47468
11	109.789	101.193	112.477	109.992	100.442	107.856	104.322	104.944	106.377	1.53805	4.35025	11	110.847	105.758	110.377	100.48	89.8645	105.858	100.461	101.384	120.49	105.058	2.8566	8.56979	11	96.5194	93.9158	94.8748	99.2833	100.84	115.01	77.1784	97.7175	96.9175	3.66437	10.3644	11	100.484	106.702	103.433	94.6786	107.978	93.7434	97.3359	104.069	101.053	1.90312	5.38284
12	110.328	96.6089	92.8378	99.7514	124.04	102.863	105.276	88.1124	102.477	3.9545	11.185	12	119.32	101.471	123.064	99.0567	105.48	103.412	106.956	93.0982	105.553	106.379	3.14152	9.42456	12	99.9106	100.468	112.234	101.53	104.437	90.7216	74.6888	98.5751	97.8205	3.92494	11.1014	12	96.8523	89.139	101.473	102.78	105.171	102.015	100.706	104.741	100.36	1.84443	5.21683
13	111.407	90.615	103.908	99.4587	117.385	93.8748	93.3671	125.932	104.493	4.48899	12.6968	13	87.1576	101.471	113.549	98.276	104.596	96.8125	106.956	94.4791	115.512	102.09	3.03931	9.11792	13	95.476	97.7379	111.036	101.489	98.7395	97.5942	82.9876	97.724	97.8481	2.72076	7.69546	13	91.4043	96.7134	99.6269	98.0601	105.171	104.772	101.102	103.696	100.068	1.65259	4.67424
14	103.315	97.3141	85.6964	119.527	113.754	97.8695	101.161	111.465	103.763	3.82038	10.8057	14	103.787	96.4687	88.8094	102.093	88.3913	96.7539	103.708	102.765	116.507	99.9203	2.87601	8.62803	14	98.6063	96.4639	105.051	100.895	104.437	98.9691	87.1369	103.962	99.44	2.07084	5.85722	14	90.799	109.985	97.1642	99.7508	102.034	106.151	97.9306	103.696	100.939	2.093	5.9199
15	90.3666	93.4357	71.4137	103.642	117.99	91.3782	103.247	97.9473	96.1775	4.74749	13.4279	15	105.904	104.329	107.84	103.22	98.9983	105.858	101.543	97.2409	93.6038	102.06	1.55223	4.65668	15	100.171	108.112	113.415	102.175	98.7387	94.7629	87.1369	97.7175	100.279	2.83346	8.01425	15	97.4576	97.2247	99.8507	106.514	107.978	99.2577	95.3534	92.366	99.5002	1.8836	5.32761
16	96.5709	102.603	85.6964	93.1096	122.225	102.863	102.322	97.4727	100.358	3.7405	10.5797	16	97.4323	96.4687	92.6155	102.873	99.5895	103.412	100.461	101.384	111.528	100.64	1.76773	5.30319	16	98.3455	97.7379	91.2784	100.895	85.0359	89.3472	82.9876	98.5751	93.0253	2.40687	6.80765	16	99.2736	96.8523	97.3881	93.4107	102.034	102.015	101.697	103.696	99.5458	1.22302	3.45922
17	101.696	93.4357	105.335	107.973	121.62	107.856	103.247	104.944	105.763	2.79158	7.89579	17	105.199	107.119	103.399	102.279	105.48	98.2478	86.6041	104.338	93.6038	100.697	2.24342	6.73025	17	98.0846	93.7001	99.189	99.9912	100.84	94.7629	74.6888	98.5751	94.979	3.02712	8.56198	17	102.3	97.7393	103.433	101.019	107.978	95.8113	102.887	105.189	102.045	1.37735	3.89572
18	94.644	101.898	92.8378	104.926	125.856	79.8935	101.161	88.1124	98.666	4.8349	13.6752	18	95.4448	109.331	97.0559	101.102	101.945	96.7531	97.6461	108.288	115.512	102.564	2.3205	6.96149	18	93.0021	97.7379	107	101.489	98.7387	97.5942	78.8382	100.395	96.8494	2.93152	8.2916	18	100.484	109.985	97.1642	102.78	105.997	96.5005	99.3182	97.5904	101.227	1.6804	4.75288
19	101.446	97.3141	101.764	99.4587	124.04	93.8748	102.322	110.991	103.901	3.36099	9.50632	19	108.729	90.0374	97.056	99.0567	100.766	101.102	110.204	61.529	105.553	97.1147	4.89735	14.692	19	100.171	97.7379	94.8748	99.2833	98.7387	103.093	82.5726	99.8032	97.0344	2.22197	6.28468	19	97.4576	102.598	97.6119	97.2147	100.218	99.2577	101.102	97.5904	99.1313	0.710339	2.00914
20	99.8558	96.6089	92.8378	101.771	117.385	113.848	93.3671	83.9548	99.9535	3.92195	11.093	20	97.4323	97.1833	100.228	106.905	89.8645	99.8785	88.1196	90.5285	93.6038	95.9715	2.00939	6.02817	20	99.3889	93.9158	100.011	102.175	100.84	100.206	74.6888	97.724	96.1186	3.18531	9.00941	20	112.591	95.4159	100.746	92.988	101.539	95.8113	106.058	93.7244	99.8593	2.40947	6.81501
Tetanus												Tetanus													Tetanus												Tetanus
1	218.426	368.101	285.655	246.849	200.885	259.091	292.254	308.571	272.479	18.8483	53.3111	1	183.568	439.248	274.675	154.596	184.443	199.757	187.065	377.111	238.989	248.828	32.6997	98.0992	1	207.33	242.286	264.376	231.058	247.901	212.122	238.59	250.238	236.738	6.82427	19.302	1	182.809	209.135	259.925	191.048	170.387	221.262	194.473	209.077	204.765	9.73807	27.5434
2	205.405	338.836	249.948	223.463	203.305	215.819	292.026	309.733	254.817	18.4595	52.2113	2	186.393	487.212	270.869	154.933	190.041	231.85	170.827	328.993	232.018	250.348	34.6698	104.009	2	205.504	254.98	247.294	257.211	275.962	209.091	228.215	240.941	239.9	8.61073	24.3548	2	193.099	186.461	248.284	208.8	160.811	219.883	195.861	152.931	195.766	10.9054	30.8452
3	219.489	322.97	223.168	223.463	196.044	203.378	285.617	310.445	248.072	17.7568	50.2237	3	211.809	426.626	258.182	156.194	206.541	222.392	168.228	289.827	192.187	236.887	27.447	82.3409	3	202.799	283.127	239.791	227.14	243.697	206.06	217.842	230.443	231.363	9.02411	25.524	3	158.596	170.723	232.388	199.501	157.509	207.476	185.553	151.862	182.951	10.0736	28.4924
4	218.426	347.651	191.032	239.053	202.095	202.297	285.136	282.934	246.078	19.3171	54.637	4	173.684	449.346	241.688	156.194	193.282	229.748	172.559	298.779	183.225	233.167	30.8094	92.4283	4	218.026	280.368	248.277	198.708	213.193	212.122	215.785	220.746	225.903	9.20896	26.0469	4	187.046	157.118	237.313	228.243	159.16	226.087	181.786	139.563	189.54	13.1299	37.1369
5	216.566	347.651	207.1	259.841	205.726	200.133	273.201	266.144	247.045	17.8119	50.3797	5	196.277	456.919	230.904	158.045	197.113	235.396	175.373	302.136	182.229	237.155	30.9407	92.8221	5	210.982	300.788	249.761	208.498	223.697	196.969	228.215	208.249	228.395	11.811	33.4064	5	184.625	160.053	227.687	228.243	143.806	217.816	179.407	152.931	186.821	12.0428	34.0622
6	199.825	342.01	217.812	228.66	203.305	194.724	256.552	308.121	243.876	19.2871	54.5522	6	171.566	439.248	245.495	159.391	198.291	235.396	177.538	293.184	201.149	235.695	29.0461	87.1382	6	213.591	307.963	249.431	196.358	210.672	193.94	200.438	198.552	221.368	13.8858	39.2748	6	186.441	153.117	232.836	225.707	150.575	215.058	175.046	142.237	185.127	12.6634	35.8174
7	208.328	363.165	228.524	233.857	196.044	214.196	236.397	291.33	246.48	19.4807	55.0998	7	178.626	483.004	258.816	155.353	195.639	230.93	182.085	275.28	207.124	240.762	32.927	98.7811	7	213.069	300.237	251.67	187.508	201.176	153.778	228.216	187.654	215.414	15.9406	45.0869	7	176.755	154.451	230.821	229.934	151.235	215.748	174.451	126.908	182.538	13.7858	38.9922
8	213.111	350.824	223.168	220.865	202.095	203.378	242.267	291.33	243.38	18.4105	52.0727	8	189.922	397.174	250.569	160.821	185.916	235.922	181.002	274.161	204.136	231.069	24.0804	72.2413	8	210.461	263.482	234.503	186.568	200.168	196.969	204.437	179.813	209.55	9.65207	27.3002	8	177.966	168.055	226.119	232.047	146.778	204.719	172.271	148.119	184.509	11.6581	32.974
9	216.034	373.743	217.812	233.857	205.726	219.605	250.295	303.923	252.624	20.4849	57.94	9	196.983	486.37	256.278	159.979	189.157	239.074	188.364	283.113	203.14	244.718	32.8055	98.4164	9	219.852	250.723	203.148	189.059	202.841	178.725	228.216	178.757	206.415	8.93967	25.2852	9	187.651	164.587	231.493	225.284	136.211	217.126	173.856	154.357	186.321	12.4426	35.1929
10	213.377	346.946	237.451	231.258	200.28	215.819	235.983	303.923	248.13	17.9111	50.6601	10	159.563	468.699	262.622	159.138	194.755	219.108	180.136	299.898	202.145	238.452	32.6791	98.0372	10	213.166	249.619	230.445	187.978	201.681	187.878	207.665	167.86	205.786	9.14221	25.8581	10	182.203	153.917	221.194	221.058	143.475	206.787	170.486	155.427	181.818	11.0092	31.1387
11	213.377	343.42	224.953	239.053	200.28	234.751	235.916	295.528	248.41	16.7818	47.4662	11	175.096	459.443	263.256	158.297	187.979	211.226	188.797	298.779	190.195	237.008	31.5337	94.6011	11	217.765	232.444	240.047	187.038	200.672	190.909	207.469	175.957	206.538	7.92268	22.4087	11	174.334	170.989	221.642	248.954	145.952	203.34	165.927	165.052	187.024	12.1984	34.5023
12	216.832	373.037	196.388	262.439	194.229	229.342	233.171	278.737	248.022	20.6511	58.4102	12	154.621	473.748	254.375	157.204	200.354	210.569	191.611	269.685	187.208	233.264	32.7085	98.1255	12	213.591	220.302	226.394	203.329	218.151	187.878	186.722	135.568	198.992	10.4375	29.5218	12	170.702	158.719	217.164	238.81	144.301	195.758	161.367	162.913	181.217	11.5952	32.7963
13	206.203	349.414	217.812	220.865	199.675	240.16	233.615	278.737	243.31	17.4499	49.3558	13	203.337	417.37	250.569	154.26	208.309	217.794	196.808	266.328	200.153	234.992	25.1897	75.569	13	214.113	225.69	214.679	203.329	218.151	190.909	186.722	146.065	199.957	9.04658	25.5876	13	190.073	166.988	221.642	235.429	137.532	194.38	163.944	159.348	183.667	11.6987	33.089
14	220.286	349.414	246.377	233.857	190.599	217.983	243.178	287.132	248.603	17.4249	49.2851	14	180.744	468.699	267.697	155.858	194.755	240.257	184.25	251.78	203.14	238.576	31.2463	93.739	14	219.426	225.204	221.993	194.478	208.655	160.909	204.437	135.568	196.334	11.3338	32.0568	14	173.729	169.389	218.284	226.975	147.438	196.448	162.557	163.448	182.283	10.0814	28.5146
15	217.894	370.217	244.592	228.66	203.91	219.605	246.181	257.748	248.601	18.4558	52.2009	15	186.393	445.138	267.063	155.69	187.095	242.227	185.116	264.09	203.14	237.328	28.9844	86.9532	15	214.209	217.477	217.122	203.329	218.151	172.727	197.095	156.562	199.584	8.21445	23.234	15	177.966	173.657	213.582	230.357	141.99	187.487	164.539	155.961	180.692	10.3698	29.3302
16	216.832	366.691	210.67	213.069	200.885	232.587	237.174	309.733	248.455	20.7263	58.6229	16	164.505	461.126	263.891	155.606	193.282	239.994	196.808	239.471	198.162	234.76	30.6959	92.0877	16	212.548	207.963	213.34	194.948	209.16	181.818	182.474	135.568	192.227	9.27185	26.2247	16	176.15	164.587	209.776	214.295	131.258	195.758	159.583	157.744	176.144	10.1176	28.6169
17	225.069	376.211	216.026	233.857	200.28	236.373	232.17	278.737	249.84	19.7153	55.7632	17	180.744	472.065	267.063	158.634	187.389	233.557	198.756	256.256	219.073	241.504	31.1606	93.4818	17	211.765	211.958	191.539	194.008	208.151	172.727	197.096	135.568	190.352	9.07739	25.6747	17	173.729	168.589	211.791	210.491	147.933	186.797	158.79	153.11	176.404	8.71563	24.6515
18	225.335	374.8	230.309	215.668	191.809	236.914	234.815	313.931	252.948	21.3623	60.4218	18	187.804	435.882	271.503	156.867	192.398	243.146	196.158	254.018	203.14	237.88	27.5656	82.6969	18	216.721	211.696	164.944	191.212	205.151	175.758	186.722	146.065	187.284	8.58613	24.2852	18	178.571	162.72	213.134	219.367	139.843	193.001	157.997	153.823	177.307	10.2131	28.8871
19	221.083	372.685	223.168	220.865	197.86	230.423	233.171	261.946	245.15	19.2707	54.5058	19	193.453	447.663	256.279	156.363	199.47	232.769	203.953	242.828	200.153	236.992	28.1512	84.4537	19	217.504	210.229	177.264	194.478	208.655	169.697	176.349	135.568	186.218	9.58324	27.1055	19	176.15	165.654	210	203.306	129.442	181.972	164.936	164.339	174.475	8.91607	25.2185
20	235.432	391.019	207.1	223.463	200.885	233.669	237.174	286.42	251.895	21.87	61.8576	20	196.983	454.394	242.957	153.419	197.407	234.739	198.107	232.757	203.14	234.878	28.8897	86.6692	20	212.026	218.181	156.862	184.688	198.151	169.697	197.095	146.065	185.346	9.15309	25.8888	20	176.755	177.392	208.881	208.8	145.292	188.865	160.773	152.04	177.35	8.51405	24.0814
21	216.034	374.095	241.021	215.668	199.675	216.36	233.171	295.978	249	20.6441	58.3904	21	165.917	447.663	237.882	157.204	189.157	227.909	204.386	233.876	187.208	227.911	29.1024	87.3073	21	214.895	211.146	165.407	175.837	188.655	186.667	176.348	146.065	183.128	8.04461	22.7536	21	176.15	172.323	210.896	206.687	150.74	195.758	155.618	155.961	178.017	8.43651	23.8621
22	215.769	387.494	237.451	205.274	198.465	222.31	238.175	312.057	252.124	22.9952	65.0402	22	222.4	447.663	246.129	157.624	190.925	228.171	207.85	233.876	211.107	238.416	27.5602	82.6805	22	210.364	230.805	180.712	175.837	188.655	166.667	165.976	114.573	179.199	12.1346	34.3217	22	181.598	168.322	209.104	206.687	137.201	192.312	155.024	164.874	176.89	8.92103	25.2325
23	220.286	377.621	246.377	210.471	191.809	221.228	227.167	302.499	249.682	21.6451	61.2215	23	190.628	461.968	230.27	160.232	182.675	229.354	204.819	229.4	207.124	232.941	29.7085	89.1255	23	215.417	218.825	169.243	146.466	157.143	186.667	200.438	114.573	176.097	12.7793	36.1453	23	185.23	177.658	201.269	194.852	139.348	182.662	159.187	158.1	174.788	7.39322	20.9112
24	219.489	394.193	224.536	220.865	188.178	221.228	232.17	309.733	251.299	23.808	67.3391	24	204.043	441.772	240.42	158.97	181.202	238.155	183.601	241.709	214.094	233.774	27.7733	83.3199	24	212.451	224.188	176.812	187.038	200.672	169.697	165.976	135.568	184.05	10.0343	28.3814	24	179.177	181.66	201.493	214.295	138.853	182.662	160.178	165.765	178.01	8.3512	23.6208
25	235.167	379.384	203.112	218.266	202.7	219.064	228.167	304.373	248.779	21.8686	61.8538	25	189.216	472.065	261.988	152.578	180.907	226.201	209.365	223.805	182.229	233.15	31.7013	95.1038	25	218.287	200.161	176.525	175.837	188.655	163.636	184.967	114.573	177.83	10.7837	30.5008	25	177.361	165.121	203.507	189.78	140.504	177.837	161.566	163.448	172.39	6.8031	19.2421
26	226.398	375.506	217.395	220.865	202.095	220.687	239.349	297.852	250.018	20.606	58.2826	26	217.458	467.858	243.591	157.54	183.559	228.04	199.839	217.091	220.069	237.227	30.0542	90.1626	26	212.973	204.529	107.176	187.038	200.672	157.576	176.348	114.573	170.111	14.32	40.5032	26	167.676	164.321	203.731	191.048	140.504	183.351	158.79	153.11	170.316	7.41249	20.9657
27	231.712	388.095	185.258	218.266	195.439	203.919	227.167	282.934	241.599	23.4311	66.2731	27	201.925	439.248	231.539	155.269	183.265	213.328	210.448	245.066	202.145	231.359	27.3838	82.1513	27	212.191	207.26	177.902	175.837	188.655	154.545	165.976	114.572	174.617	10.9948	31.0979	27	176.15	172.323	195.448	177.1	145.952	182.662	157.799	157.744	170.647	5.63086	15.9265
28	225.335	380.691	203.112	220.865	193.624	232.046	230.795	287.582	246.756	21.5197	60.8669	28	197.689	483.004	235.979	155.858	203.3	207.285	188.364	233.876	187.208	232.507	32.348	97.0439	28	218.19	223.642	140.788	187.038	200.672	151.515	184.967	104.076	176.361	14.5603	41.1827	28	182.203	161.653	196.343	173.718	137.367	168.876	159.385	164.517	168.008	6.12895	17.3353
29	221.083	372.581	203.415	202.676	196.044	222.31	237.347	303.923	244.922	21.881	61.8888	29	173.684	472.065	233.442	157.961	200.648	191.259	206.984	224.924	227.04	232.001	31.1491	93.4473	29	214.017	212.925	160.478	175.837	188.655	163.636	176.348	114.573	175.809	11.2883	31.928	29	176.15	176.858	193.657	168.224	147.603	181.972	160.574	155.605	170.08	5.32618	15.0647
30	227.726	380.431	194.926	236.455	202.7	213.655	232.852	240.507	241.157	20.72	58.605	30	175.096	502.358	246.129	160.568	197.996	194.819	203.087	233.876	197.166	234.566	34.5941	103.782	30	215.678	226.918	172.115	221.03	205.126	157.576	165.976	104.076	183.562	14.7683	41.771	30	170.702	174.457	195.448	176.677	140.999	188.176	151.059	163.982	170.188	6.3789	18.0423
31	232.775	374.437	222.818	207.872	205.121	208.787	237.347	308.121	249.66	21.3578	60.4091	31	168.741	485.529	223.926	157.372	188.273	204.408	200.055	242.828	228.035	233.241	32.8562	98.5685	31	215.417	202.345	89.9821	187.038	200.672	154.545	176.348	125.071	168.927	15.2547	43.1467	31	176.755	167.255	192.313	191.471	137.036	180.594	157.601	162.735	170.72	6.56459	18.5675
32	226.663	393.477	222.818	220.865	209.356	220.687	232.524	295.528	252.74	22.1792	62.7323	32	158.151	440.931	240.42	156.11	181.791	228.303	209.365	228.281	183.225	225.175	28.857	86.5711	32	212.973	200.161	165.523	221.5	188.655	157.576	165.976	122.67	179.379	11.5601	32.6968	32	167.07	176.058	194.776	185.976	141.164	172.322	154.032	152.753	168.019	6.36999	18.0171
33	233.572	376.812	214.329	236.455	212.987	240.16	232.598	253.55	250.058	18.7032	52.9006	33	196.277	455.236	237.248	160.484	177.666	209.768	209.582	220.448	192.187	228.766	29.3035	87.9104	33	210.364	212.721	182.139	218.681	200.672	151.515	176.348	133.168	185.701	10.9208	30.8885	33	161.622	174.991	184.03	184.285	142.32	175.08	155.42	166.834	168.073	5.1424	14.5449
34	231.181	369.408	233.732	233.857	200.078	226.096	234.627	312.319	255.162	19.8692	56.1986	34	159.563	493.102	229.636	162.25	194.166	228.434	223.871	241.709	196.17	236.545	33.5399	100.62	34	211.243	213.813	174.233	200.509	215.126	148.485	155.602	133.168	181.522	11.6269	32.8859	34	157.99	170.189	184.702	197.388	134.23	169.565	151.654	157.387	165.388	6.96384	19.6967
35	231.446	377.517	237.37	226.061	210.566	209.869	234.732	256.136	247.962	19.2449	54.4328	35	189.216	485.529	229.001	161.325	196.523	220.027	212.613	222.686	252.93	241.095	31.7695	95.3084	35	211.243	209.444	131.534	200.509	215.126	142.424	145.229	133.168	173.585	13.5827	38.4178	35	166.465	169.656	183.134	167.801	134.395	173.012	152.645	157.744	163.106	5.24065	14.8228
36	238.355	360.946	216.755	220.865	211.373	232.046	243.178	284.096	250.952	17.6347	49.8784	36	183.568	513.297	240.42	156.11	193.282	205.315	214.778	221.567	199.158	236.388	35.5172	106.552	36	217.765	209.99	135.546	191.189	205.126	145.455	165.976	143.665	176.839	11.7174	33.1417	36	169.492	174.19	181.343	178.368	143.806	181.283	153.24	156.496	167.277	5.06021	14.3124
37	231.712	389.858	224.031	231.258	211.373	232.046	239.304	288.294	255.985	20.7145	58.5895	37	217.458	458.602	232.808	157.793	191.514	234.409	213.696	223.805	195.174	236.14	28.9435	86.8305	37	219.591	169.581	156.64	200.979	215.63	142.424	145.229	143.665	174.217	11.6535	32.9611	37	166.465	174.724	180	173.296	142.815	167.497	149.671	151.127	163.199	4.80035	13.5774
38	233.838	398.673	231.37	223.463	204.112	204.46	236.346	279.899	251.52	22.6217	63.9838	38	198.395	472.065	237.882	156.279	200.648	234.137	216.51	218.209	197.166	236.81	30.494	91.4821	38	215.843	191.97	153.999	221.5	237.647	139.394	165.974	122.67	181.125	14.8032	41.8699	38	175.545	178.992	175.075	155.966	142.32	175.08	156.015	147.027	163.252	5.15022	14.567
39	234.901	367.292	199.233	213.069	200.078	206.083	234.729	286.42	242.726	20.4781	57.9209	39	154.621	486.37	244.226	160.989	188.568	234.816	226.686	229.4	207.124	236.978	32.9581	98.8743	39	219.426	202.345	177.616	218.681	234.622	136.364	155.602	122.67	183.416	14.7793	41.8021	39	158.596	174.191	175.97	170.76	142.815	175.08	153.834	146.136	162.173	4.79831	13.5717
40	244.201	374.344	234.694	241.652	194.431	231.505	233.171	279.899	254.237	19.0219	53.802	40	194.159	523.395	234.711	160.568	190.336	227.75	214.345	231.638	214.094	243.444	35.8741	107.622	40	218.026	207.806	194.748	210.3	225.63	136.364	145.227	122.67	182.596	14.5054	41.0276	40	173.124	176.858	177.313	162.729	142.485	173.012	148.482	145.958	162.495	5.20946	14.7346
41	245.53	376.46	228.045	205.274	200.078	221.769	235.173	264.27	247.075	19.883	56.2376	41	211.809	503.2	237.248	156.026	190.041	220.276	231.016	231.638	195.174	241.825	33.7768	101.33	41	216.721	188.693	159.618	190.719	204.622	139.394	145.228	122.67	170.958	11.9905	33.9141	41	175.545	177.658	174.179	171.182	139.843	172.322	155.618	145.78	164.016	5.22712	14.7845
42	237.824	364.824	254.64	213.069	208.146	220.146	232.654	270.341	250.206	17.966	50.8156	42	191.335	504.883	239.785	160.232	194.166	224.353	224.954	227.162	185.216	239.121	34.2834	102.85	42	215.678	193.69	133.827	190.719	204.622	139.394	155.602	139.809	171.668	11.663	32.988	42	168.886	169.656	168.358	168.646	142.155	166.119	148.482	153.088	160.674	3.8949	11.0164
43	239.684	373.39	245.775	202.676	214.6	232.046	236.886	270.341	251.925	18.7657	53.0775	43	164.505	439.248	239.785	157.54	200.943	222.315	218.892	238.352	223.056	233.849	27.4954	82.4863	43	218.287	193.69	105.743	187.287	200.94	133.333	155.602	182.454	172.167	13.3277	37.6965	43	173.729	160.053	165.896	165.265	141.329	166.808	152.248	147.74	159.133	3.89664	11.0214
44	232.244	384.673	214.747	213.069	225.895	234.751	232.243	266.144	250.471	20.0207	56.6272	44	175.096	498.151	240.42	157.036	203.595	218.646	231.882	234.995	188.204	238.669	33.8044	101.413	44	213.33	195.875	127.697	189.779	203.613	133.333	134.855	119.47	164.744	13.8677	39.2237	44	159.806	176.325	163.433	159.348	141.99	172.322	144.913	148.988	158.391	4.39785	12.439
45	243.138	381.852	252.424	231.258	206.532	226.637	232.021	278.737	256.575	19.3777	54.8083	45	166.623	509.09	248.032	156.867	190.336	216.607	239.027	223.805	218.077	240.941	35.0632	105.19	45	212.383	184.953	137.665	186.959	200.588	136.364	145.227	192.295	174.554	10.6612	30.1543	45	168.281	176.325	161.194	165.265	149.584	170.255	150.068	153.622	161.824	3.5116	9.93231
46	235.432	377.974	249.1	218.266	219.441	212.574	234.83	324.912	259.066	21.1779	59.9003	46	177.214	498.151	246.129	156.699	195.639	201.116	170.827	236.114	207.124	232.112	34.6333	103.9	46	216.035	204.612	154.173	189.637	203.461	113.333	134.855	182.454	174.82	13.0168	36.817	46	150.121	183.527	161.866	153.008	143.475	167.497	153.24	144.889	157.203	4.71361	13.3321
47	242.607	371.627	247.992	220.865	204.112	226.096	230.229	261.946	250.684	18.3749	51.972	47	168.741	532.651	255.644	154.849	188.863	208.182	168.228	223.805	225.048	236.223	38.6138	115.842	47	216.557	193.144	107.176	187.915	201.613	120.303	141.095	160.804	166.076	14.1655	40.0662	47	169.492	179.792	162.761	178.368	151.896	163.362	152.447	147.919	163.254	4.27219	12.0836
48	240.215	386.083	233.353	228.66	206.532	222.31	232.654	275.701	253.189	20.2145	57.1754	48	160.975	509.932	233.442	154.933	190.631	217.151	172.559	227.162	212.102	230.987	36.1531	108.459	48	213.591	198.059	103.451	188.227	201.949	119.394	134.854	192.951	169.06	15.1098	42.737	48	168.281	164.587	157.612	164.842	143.806	157.847	150.464	153.622	157.633	2.90453	8.21527
49	247.124	380.089	212.299	220.865	207.339	233.669	230.048	304.373	254.476	20.9091	59.1398	49	199.101	473.748	246.129	158.55	192.398	219.053	175.373	211.495	188.204	229.339	31.6966	95.0898	49	211.243	196.421	146.666	190.249	204.118	130.303	155.602	161.459	174.508	10.5315	29.7876	49	165.254	168.322	158.507	157.234	139.513	160.604	155.42	147.384	156.53	3.30214	9.33986
50	245.796	373.743	203.433	236.455	213.793	221.769	227.394	279.899	250.285	19.4542	55.0247	50	177.92	495.627	255.644	155.269	187.979	225.984	177.538	212.614	198.162	231.86	34.4261	103.278	50	218.287	184.953	113.25	188.839	202.605	133.333	134.855	203.449	172.446	13.9157	39.3596	50	161.017	165.388	158.284	169.069	141.99	165.429	153.24	157.187	158.95	3.02936	8.56831
51	245.53	370.569	233.353	241.652	236.383	196.888	230.169	268.467	252.876	18.2141	51.5173	51	190.628	512.456	256.279	157.54	197.996	232.37	182.085	229.4	193.183	239.104	35.5918	106.776	51	217.6	205.158	144.716	190.719	204.622	130.303	150.029	150.962	174.264	11.9229	33.7231	51	159.806	174.724	154.478	172.873	145.622	157.158	154.825	140.789	157.534	4.17275	11.8023
52	251.11	354.516	226.704	220.865	219.441	207.165	228.167	240.957	243.616	16.5386	46.7783	52	177.92	523.395	253.107	159.307	195.934	222.722	181.002	226.043	228.035	240.829	36.6861	110.058	52	217.861	199.697	102.361	188.369	202.101	133.333	134.855	140.465	164.88	14.8552	42.0167	52	154.358	182.993	150.448	160.193	143.475	166.119	153.636	157.365	158.574	4.21195	11.9132
53	246.327	329.793	236.678	226.061	237.19	208.787	215.845	278.025	247.338	13.9443	39.4405	53	196.277	413.63	267.697	153.335	207.425	241.611	188.364	227.162	225.048	235.616	24.7999	74.3997	53	217.339	191.506	108.896	187.899	201.597	127.273	141.095	150.962	165.821	13.784	38.9869	53	165.254	181.66	142.612	170.337	147.273	165.429	154.825	154.157	160.193	4.54741	12.862
54	250.844	318.822	225.596	223.463	225.895	223.392	224.31	287.77	247.511	12.9305	36.5728	54	194.158	377.447	265.794	156.194	192.988	240.66	180.136	224.924	229.031	229.037	21.648	64.9441	54	216.035	198.687	129.242	188.369	202.101	127.273	155.602	129.968	168.41	13.0839	37.007	54	169.492	181.126	147.313	180.059	142.815	158.537	153.24	153.088	160.709	5.15237	14.5731
55	253.767	305.029	216.731	228.66	221.054	220.146	225.165	276.151	243.338	11.4012	32.2476	55	205.455	449.813	258.182	155.942	199.47	228.158	188.797	229.4	230.027	238.36	28.1868	84.5603	55	215.513	194.319	107.806	187.429	201.092	124.243	134.854	171.957	167.152	14.0595	39.7662	55	148.91	173.39	109.03	155.966	142.98	159.226	152.843	140.589	147.867	6.62393	18.7353
56	253.502	268.319	237.786	233.857	233.962	244.487	220.162	279.187	246.408	6.92329	19.582	56	148.267	394.089	253.741	158.886	194.461	236.447	191.611	214.852	222.06	223.824	24.139	72.4171	56	214.209	201.964	122.595	161.347	173.109	130.303	150.029	140.465	161.753	11.6579	32.9735	56	161.622	175.258	132.09	185.553	138.687	154.401	154.231	150.214	156.507	6.24558	17.6652
57	256.69	257.389	253.3	220.865	226.702	200.674	222.163	266.594	238.047	8.2832	23.4284	57	185.686	422.699	256.278	153.335	195.934	231.012	196.808	207.371	233.014	231.349	25.936	77.8081	57	213.687	187.22	130.214	178.579	191.597	124.242	134.855	141.121	162.689	11.9996	33.9399	57	156.174	173.39	156.045	185.976	147.438	158.537	157.204	141.302	159.508	4.9996	14.141
58	243.67	288.416	245.543	220.865	229.929	245.028	222.163	283.384	247.375	9.10897	25.764	58	175.096	420.175	256.913	161.073	202.711	229.245	184.25	207.371	239.985	230.758	25.8471	77.5412	58	214.731	205.24	127.236	179.19	192.253	124.242	124.481	188.951	169.541	13.479	38.1244	58	151.332	171.79	162.537	183.017	141.164	164.74	150.662	142.55	158.474	5.17672	14.642
59	245.53	278.544	238.894	207.872	231.542	208.787	223.164	288.744	240.385	10.5675	29.8894	59	179.332	385.674	255.644	155.353	185.916	225.168	185.116	177.925	216.086	218.468	23.1905	69.5714	59	210.296	214.523	104.254	176.229	189.076	124.242	141.095	241.437	175.144	16.9833	48.036	59	150.121	179.526	165.224	186.399	144.466	154.401	157.403	138.45	159.499	5.89311	16.6682
60	255.362	277.486	231.137	239.053	223.474	216.901	222.163	280.349	243.241	8.85344	25.0413	60	151.091	392.406	250.569	156.783	181.202	245.823	196.808	183.52	218.078	219.587	24.5646	73.6938	60	215.871	205.24	92.2747	169.258	181.597	127.273	124.481	230.94	168.367	17.4807	49.4428	60	157.385	178.459	163.881	191.471	146.778	152.333	157.006	132.924	160.029	6.44852	18.2392
61	252.97	272.197	238.894	231.258	208.953	223.933	214.157	273.827	239.524	8.77796	24.8278	61	180.038	416.809	238.517	157.793	206.836	235.224	198.756	173.449	235.006	226.936	25.6469	76.9406	61	217.697	200.872	126.893	178.109	191.092	130.303	124.481	199.448	171.112	13.431	37.9887	61	163.438	180.059	170.821	185.976	142.98	153.712	154.231	143.797	161.877	5.67401	16.0485
62	253.502	265.498	253.3	210.471	217.02	221.769	215.845	280.349	239.719	9.4042	26.5991	62	194.159	426.907	244.226	160.232	190.336	239.029	196.158	189.115	238.989	231.017	26.2652	78.7955	62	210.557	190.496	100.355	167.378	179.58	115.151	134.855	119.47	152.23	14.1956	40.1511	62	156.174	178.992	168.134	174.564	150.08	153.022	153.24	140.945	159.394	4.64172	13.1288
63	262.802	276.076	231.137	213.069	212.987	233.669	220.078	285.708	241.941	10.2217	28.9113	63	216.046	442.053	253.741	153.839	199.47	241.339	203.953	180.163	218.077	234.298	27.8199	83.4596	63	218.74	183.943	104.31	168.318	180.588	121.212	124.481	140.465	155.257	13.7489	38.8878	63	162.228	175.791	170.597	175.409	154.703	154.401	150.266	142.015	160.676	4.38755	12.4099
64	256.159	266.203	234.461	213.069	236.383	208.787	219.8	281.511	239.547	9.27794	26.242	64	212.515	450.468	245.495	157.793	192.988	235.088	198.107	194.71	249.942	237.456	28.3631	85.0892	64	218.74	192.135	138.412	169.258	181.597	124.242	118.948	129.968	159.162	12.9293	36.5696	64	156.78	174.19	169.254	174.141	140.338	154.401	154.032	137.202	157.542	5.03966	14.2543
65	260.41	262.325	224.256	233.857	208.953	233.669	219.496	282.673	240.705	8.90627	25.1907	65	175.096	442.894	250.569	158.213	190.631	238.078	204.386	173.449	219.073	228.043	28.7396	86.2187	65	218.218	195.836	84.5936	178.109	191.092	124.242	125.894	141.121	157.388	16.0346	45.3527	65	156.174	176.058	165.448	183.863	145.952	155.09	148.482	145.045	159.514	5.08408	14.3799
66	268.382	279.249	215.39	223.463	225.895	254.764	223.164	251.676	242.748	8.45309	23.909	66	142.618	414.284	260.085	156.279	184.738	232.778	207.85	166.734	220.069	220.604	27.3328	81.9983	66	217.175	188.136	123.797	188.511	202.253	127.273	139.849	119.47	163.308	14.0164	39.6443	66	139.225	183.794	164.552	167.801	139.348	144.751	156.213	145.758	155.18	5.62154	15.9001
67	267.585	270.082	234.229	220.865	216.214	248.273	223.164	276.151	244.57	8.58031	24.2688	67	212.515	415.126	239.151	159.727	210.666	239.708	204.819	168.972	230.027	231.19	24.8364	74.5093	67	211.34	189.475	97.1463	177.639	190.588	130.303	125.894	129.968	156.544	14.3635	40.6262	67	160.412	175.258	160.746	173.718	145.126	155.09	153.24	148.966	159.07	3.8442	10.873
68	259.613	264.793	217.607	205.274	226.702	253.141	223.164	281.511	241.476	9.49195	26.8473	68	184.98	425.224	258.816	159.979	196.523	237.262	183.601	182.401	194.178	224.774	27.0035	81.0105	68	219.523	185.124	71.6418	168.788	181.092	115.152	124.44	182.454	156.027	16.9859	48.0435	68	153.753	176.858	159.627	167.801	144.796	148.887	154.627	144.154	156.313	4.03132	11.4023
69	266.256	265.851	239.77	218.266	221.054	269.368	207.381	282.673	246.327	10.0144	28.3251	69	193.453	427.748	248.032	161.325	194.461	233.865	209.365	195.829	236.002	233.342	25.8973	77.6919	69	217.175	173.742	130.961	171.138	183.613	118.182	124.44	119.47	154.84	12.9736	36.695	69	152.542	182.727	156.045	150.471	149.254	148.887	151.059	142.55	154.192	4.29309	12.1427
70	263.599	254.568	207.633	207.872	209.759	254.223	228.542	285.708	238.988	10.5034	29.7082	70	187.098	435.321	237.882	163.176	198.586	251.531	199.839	181.282	163.309	224.225	28.2366	84.7099	70	211.6	186.128	63.9045	168.318	180.588	121.212	118.948	200.104	156.35	17.8106	50.376	70	150.726	190.196	155.597	173.296	150.08	141.304	153.834	154.313	158.668	5.50657	15.5749
71	269.445	264.441	212.066	218.266	222.668	235.832	212.641	271.953	238.414	9.24294	26.143	71	146.854	421.858	238.517	157.456	201.237	238.893	210.448	187.996	209.115	223.597	26.9201	80.7604	71	214.47	186.797	98.006	158.669	170.236	106.061	119.917	188.951	155.388	15.1298	42.7936	71	159.806	181.926	147.313	150.894	132.413	141.994	151.455	153.6	152.425	5.11455	14.4661
72	268.648	268.754	250.851	223.463	207.339	250.978	222.163	282.673	246.859	9.43849	26.6961	72	172.978	442.894	257.547	163.26	194.166	253.161	188.364	195.829	251.934	235.57	28.5561	85.6682	72	212.74	182.78	125.516	176.229	189.076	121.212	114.1	129.968	156.453	13.3704	37.8172	72	135.593	186.995	146.418	176.254	143.145	148.197	155.024	143.262	154.361	6.33444	17.9165
73	268.382	251.789	233.121	213.069	212.18	254.223	211.613	285.708	241.261	9.97831	28.2229	73	176.508	454.675	235.979	162.25	192.398	252.89	206.984	177.925	254.921	234.948	29.7084	89.1251	73	212.122	183.115	114.453	176.229	189.076	115.152	124.44	199.448	164.254	14.0926	39.8598	73	159.201	176.591	143.955	167.378	142.98	139.926	153.834	144.154	153.502	4.69006	13.2655
74	259.613	246.894	242.218	220.865	217.827	269.368	210.585	265.882	241.657	8.09604	22.899	74	208.279	475.712	238.517	164.185	180.024	254.52	203.087	185.758	219.503	236.62	31.3463	94.0389	74	219.88	174.411	92.5612	186.019	199.58	127.273	119.917	199.448	164.886	16.162	45.713	74	147.7	178.725	137.015	159.77	142.32	147.508	154.627	150.036	152.213	4.51574	12.7724
75	274.228	276.864	216.731	223.463	229.929	252.6	219.161	256.324	243.663	8.65929	24.4922	75	198.395	455.517	253.107	163.26	186.8	255.879	200.055	190.234	225.477	236.525	29.2252	87.6756	75	215.349	179.433	129.815	186.019	199.58	118.182	118.257	178.454	165.636	13.4785	38.1228	75	156.174	179.259	136.343	170.337	154.868	136.479	153.24	162.156	156.107	5.27918	14.9318
76	279.011	270.828	193.693	213.069	212.987	255.305	207.381	262.846	236.89	11.8129	33.4118	76	186.392	437.004	238.517	163.26	190.041	249.085	209.365	187.996	207.553	229.913	27.3694	82.1082	76	217.175	172.403	105.283	166.438	178.571	115.151	125.894	119.47	150.048	13.9054	39.3303	76	146.489	177.925	139.11	165.265	143.31	139.926	151.654	166.256	153.742	5.07967	14.3675
77	271.837	291.59	195.033	179.29	234.769	261.796	217.159	252.576	238.006	13.7147	38.7911	77	148.267	461.407	243.591	160.568	194.461	251.531	209.582	198.067	230.456	233.103	30.8022	92.4065	77	217.01	176.754	80.2389	139.887	150.084	118.182	118.948	136.465	142.196	14.5453	41.1403	77	151.937	176.591	135.239	161.884	141.659	137.858	157.006	145.758	150.992	4.90293	13.8676
78	271.039	297.936	215.445	196.261	207.339	252.6	207.381	243.731	236.467	12.7052	35.9359	78	179.332	429.431	253.741	165.615	195.05	248.541	170.827	184.639	231.452	228.736	27.427	82.2809	78	210.653	163.699	116.919	127.276	136.555	109.091	124.44	167.956	144.574	12.0057	33.9573	78	153.148	186.194	138.654	164.42	150.575	142.683	151.059	161.443	156.022	5.26515	14.8921
79	276.62	293	215.145	193.662	213.793	231.505	198.916	275.439	237.26	13.7306	38.836	79	212.515	426.907	244.86	159.979	194.461	239.029	168.228	203.662	227.469	230.79	26.3672	79.1015	79	219.097	144.952	112.16	156.648	168.067	109.091	134.855	146.306	148.897	12.3268	34.8655	79	154.358	177.125	132.052	163.152	142.485	140.615	152.843	162.156	153.098	5.12953	14.5085
80	285.654	290.885	193.765	198.859	212.987	251.518	203.148	281.961	239.847	14.9312	42.2319	80	178.626	431.114	242.957	163.764	202.711	249.357	172.559	200.305	211.536	228.103	27.1954	81.5861	80	220.141	156.669	104.387	136.455	146.403	115.151	134.855	167.956	147.752	12.654	35.7909	80	159.806	182.993	125.221	166.11	146.282	149.576	155.817	166.79	156.575	6.03887	17.0805
81	283.263	295.468	215.858	204.056	231.542	253.682	215.158	286.158	248.148	12.8858	36.4467	81	194.865	447.943	253.107	162.166	190.336	248.405	175.373	182.401	223.486	230.898	29.1228	87.3685	81	216.489	161.355	103.737	156.648	168.067	112.121	125.894	157.459	150.221	12.7697	36.1182	81	154.964	176.591	133.645	177.1	152.226	155.09	155.42	159.661	158.087	4.93523	13.959
82	285.123	304.988	191.736	191.064	216.214	235.832	207.381	255.162	235.938	15.0764	42.6425	82	167.329	448.785	275.943	160.148	198.291	245.959	177.538	174.568	242.406	232.33	30.2707	90.8121	82	215.706	174.411	109.868	146.857	157.563	109.091	118.948	188.951	152.674	13.8155	39.0761	82	156.78	183.26	124.311	165.688	149.584	158.537	152.248	155.918	155.791	5.8296	16.4886
83	279.277	297.584	207.185	191.064	218.634	254.223	220.078	282.673	243.84	14.0718	39.801	83	176.508	460.565	268.331	166.372	202.416	229.245	182.085	184.639	255.351	236.168	30.4947	91.4842	83	218.672	159.682	107.98	176.229	189.076	115.151	141.095	129.968	154.732	13.566	38.3703	83	159.201	177.392	122.034	169.069	145.126	143.372	158.394	158.413	154.125	6.05549	17.1275
84	286.451	294.763	206.105	178.072	227.508	250.978	203.148	281.961	241.123	15.5414	43.9576	84	186.392	464.773	233.442	162.923	194.755	214.977	181.002	195.829	215.52	227.735	30.4437	91.331	84	217.367	161.355	106.03	195.81	210.084	110.909	119.917	167.956	161.179	15.8481	44.8253	84	158.596	190.462	125.449	167.378	150.41	144.062	155.618	156.987	156.12	6.59005	18.6395
85	280.871	279.602	206.553	209.253	222.668	252.6	219.161	265.17	241.985	11.0181	31.1639	85	206.161	487.492	260.085	166.877	197.407	203.698	188.364	194.71	255.351	240.016	32.5391	97.6173	85	210.228	155.999	110.329	156.648	168.067	109.273	124.44	150.962	148.243	11.8744	33.5858	85	156.174	183.794	124.994	148.781	119.04	149.576	153.041	155.561	148.87	7.0655	19.9843
86	268.382	277.839	219.128	201.458	229.122	254.223	215.845	290.356	244.544	11.521	32.5864	86	179.332	485.81	246.129	130.288	198.291	215.928	180.136	191.353	222.49	227.751	34.0348	102.105	86	212.315	174.411	101.072	195.198	209.428	111.818	125.894	178.454	163.574	15.7106	44.4363	86	158.596	174.457	125.904	166.533	124.488	148.887	151.455	164.473	151.849	6.49491	18.3704
87	273.431	279.602	206.685	180.67	233.156	275.318	218.7	265.17	241.591	13.1455	37.181	87	167.329	468.98	254.375	141.054	200.943	241.067	188.797	207.371	243.401	234.813	31.7744	95.3233	87	219.976	154.995	109.755	166.438	178.571	109.091	119.917	147.618	150.795	13.5006	38.1855	87	151.332	186.461	118.391	189.357	133.569	141.994	155.024	157.878	154.251	8.61492	24.3667
88	281.137	275.018	208.346	183.269	245.257	254.223	219.161	286.158	244.071	13.2295	37.4187	88	189.216	442.894	265.794	160.568	189.157	236.447	191.611	207.371	233.444	235.167	28.0268	84.0805	88	219.976	163.029	102.439	137.679	147.715	108.727	125.894	167.301	146.595	13.3474	37.7521	88	159.806	174.724	127.043	153.43	131.588	151.644	154.231	159.482	151.493	5.47383	15.4823
89	284.857	267.966	218.048	183.269	236.383	235.832	228.542	256.774	238.959	11.1236	31.4622	89	186.392	431.955	257.547	166.288	207.425	238.757	196.808	177.925	245.393	234.277	26.8685	80.6055	89	213.88	162.025	108.952	156.036	167.411	108.818	118.948	136.465	146.567	12.6765	35.8545	89	147.094	189.395	130.458	163.152	134.23	139.926	151.257	143.954	149.933	6.68635	18.9118
90	280.074	254.215	196.351	204.056	219.441	250.978	219.05	248.379	234.068	10.1559	28.7253	90	147.561	428.589	244.86	162.671	210.371	231.012	184.25	183.52	201.865	221.633	27.8362	83.5085	90	213.194	158.343	98.006	176.229	189.076	107.255	123.875	167.956	154.242	14.4355	40.8297	90	147.7	180.859	129.092	167.801	141.659	150.265	149.869	142.528	151.222	5.70897	16.1474
91	290.172	277.134	215.754	193.662	231.542	254.223	220.162	231.588	239.28	11.4682	32.4371	91	176.508	438.687	235.345	158.129	208.014	227.343	185.116	173.449	169.004	219.066	28.8563	86.5689	91	213.976	164.034	101.473	156.648	168.067	96.3636	119.917	146.306	145.848	13.8054	39.0476	91	154.964	183.527	122.489	169.492	131.753	133.722	149.869	154.292	150.013	7.19847	20.3604
92	279.011	272.903	212.116	191.064	225.088	269.368	217.71	227.39	236.831	11.5241	32.5951	92	189.216	446.26	248.666	159.727	208.309	234.952	196.808	189.115	167.012	226.674	29.0724	87.2173	92	212.315	174.746	119.817	136.455	146.403	107.091	139.995	119.47	144.536	12.1284	34.3042	92	150.121	186.728	125.221	167.378	108.638	135.101	154.032	148.588	146.976	8.60109	24.3275
93	276.885	245.401	202.415	175.473	229.929	252.6	214.157	244.181	230.13	11.2855	31.9201	93	152.503	441.212	254.375	151.4	218.621	233.593	198.756	180.163	194.894	225.058	29.3454	88.0363	93	212.411	157.004	103.888	176.229	189.076	105.455	120.849	104.973	146.236	15.2558	43.15	93	143.462	186.995	124.994	166.11	120.691	136.479	149.076	151.261	147.384	7.65986	21.6654
94	279.011	260.915	213.329	188.466	230.735	255.305	224.31	248.379	237.556	10.2775	29.0692	94	176.508	470.663	249.935	150.223	203.005	239.98	196.158	194.71	177.966	228.794	31.9408	95.8224	94	211.107	157.004	102.486	97.905	105.042	107.273	134.855	115.47	128.893	13.6662	38.654	94	131.961	188.328	125.677	166.533	134.395	135.101	155.817	147.162	148.122	7.48642	21.1748
95	284.591	241.875	243.514	178.072	233.156	261.796	237.007	235.785	239.474	10.6785	30.2035	95	157.445	447.102	251.204	146.942	217.443	236.719	203.953	173.449	208.835	227.01	29.859	89.5771	95	216.681	165.038	95.7135	107.695	115.546	103.636	119.917	146.962	133.899	14.3838	40.6835	95	145.278	181.66	120.896	175.832	139.348	133.722	156.808	147.875	150.177	7.28014	20.5913
96	275.291	261.972	248.365	188.466	234.769	252.6	215.845	256.774	241.76	9.89244	27.98	96	186.392	450.468	265.794	149.466	211.844	237.806	198.107	166.734	179.957	227.397	30.3059	90.9177	96	213.454	155.33	104.384	137.067	147.059	101.818	118.494	146.962	140.571	12.6235	35.7046	96	141.647	181.66	123.628	179.213	142.65	131.654	152.05	155.539	151.005	7.36597	20.8341
97	283.529	295.246	232.6	193.662	219.441	231.505	223.164	235.785	239.366	11.9086	33.6826	97	184.98	485.81	242.957	145.428	201.237	226.935	204.386	168.972	205.848	229.617	33.4549	100.365	97	212.054	151.647	115.249	137.067	147.059	103.091	125.894	167.956	145.002	12.0572	34.103	97	138.62	181.926	117.936	158.925	140.504	134.411	154.231	161.599	148.519	6.97528	19.7291
98	276.354	310.694	205.921	183.269	235.576	251.518	217.593	244.181	240.638	14.2476	40.2983	98	204.749	416.809	250.569	142.989	205.657	236.039	207.85	182.401	171.991	224.339	26.35	79.05	98	212.933	158.677	117.948	156.648	168.067	103.273	120.849	157.459	149.482	12.335	34.8885	98	145.278	177.658	119.985	185.131	136.376	136.479	153.438	156.787	151.392	7.71496	21.8212
99	282.2	278.858	218.048	191.064	235.576	253.682	217.159	260.972	242.195	11.4152	32.2871	99	205.455	439.529	251.204	145.933	203.3	227.071	204.819	195.829	186.928	228.896	27.9854	83.9561	99	211.107	157.673	115.724	146.857	157.563	103.091	120.849	146.306	144.896	11.8701	33.5736	99	144.068	196.865	117.936	164.42	135.22	131.654	152.05	151.44	149.207	8.47661	23.9755
100	276.885	285.015	228.962	193.662	240.417	235.832	207.381	231.588	237.468	10.9845	31.0688	100	222.4	456.358	243.591	143.494	210.077	203.154	183.601	181.282	218.793	229.194	29.9832	89.9497	100	213.551	149.974	103.396	136.455	146.403	103.091	123.875	136.465	139.151	12.343	34.9113	100	138.62	198.465	114.976	160.616	138.522	136.479	156.808	158.748	150.404	8.7156	24.6514
101	270.508	287.395	195.007	183.269	233.156	254.223	224.31	252.576	237.555	12.6953	35.9077	101	157.445	489.175	244.86	143.914	180.024	191.74	209.365	187.996	208.835	223.706	34.6231	103.869	101	217.464	160.016	113.096	127.276	136.555	103.091	118.494	157.459	141.681	12.96	36.6565	101	155.569	189.662	114.521	165.688	133.239	128.897	158.376	153.757	149.964	8.36609	23.6629
102	251.907	262.311	199.857	149.489	250.098	251.518	203.148	256.774	228.138	14.1368	39.9849	102	216.752	446.26	254.376	144.251	186.8	231.419	199.839	195.829	215.806	232.37	28.6229	85.8688	102	215.898	155.33	89.8503	146.857	157.563	101.818	119.917	146.962	141.775	13.8554	39.1891	102	146.489	168.855	117.253	172.45	137.367	133.033	156.7	148.766	147.614	6.53646	18.4879
103	267.319	266.545	191.369	175.473	242.837	235.832	218.543	244.181	230.262	11.7446	33.2187	103	209.691	451.309	242.323	145.176	190.041	231.012	210.448	177.925	204.852	229.197	29.3579	88.0736	103	213.29	165.038	109.363	137.067	147.059	103.273	124.437	125.967	140.687	12.5211	35.4151	103	148.305	182.193	111.789	162.306	134.725	127.519	140.552	147.875	144.408	7.59838	21.4915
104	264.662	245.9	206.237	191.064	239.61	255.305	200.065	248.379	231.403	9.89753	27.9944	104	163.093	474.029	247.398	146.017	194.461	232.099	188.364	185.758	187.924	224.349	32.8768	98.6305	104	213.29	154.995	115.02	117.486	126.05	107.273	125.894	178.454	142.308	13.1121	37.0865	104	145.278	183.794	110.65	170.76	131.423	126.829	142.733	147.34	144.851	8.31678	23.5234
105	268.914	251.027	198.961	196.261	246.871	255.305	214.817	231.588	232.968	9.58581	27.1128	105	179.332	458.041	238.517	141.475	195.05	229.245	206.984	190.234	190.911	225.532	30.5415	91.6246	105	216.159	158.008	105.568	166.438	178.571	103.636	119.917	137.121	148.177	13.8201	39.0893	105	135.593	179.792	109.284	172.873	130.597	124.761	148.284	149.835	143.878	8.44378	23.8826
106	265.194	279.522	220.789	193.662	239.61	226.096	214.105	260.972	237.494	10.3221	29.1952	106	168.036	440.37	260.719	139.204	194.461	240.252	203.087	187.996	186.928	224.561	29.5166	88.5498	106	213.386	155.664	112.227	127.888	137.211	101.818	134.855	94.4755	134.691	13.288	37.5842	106	160.412	181.126	109.967	183.017	138.522	127.519	146.301	153.4	150.033	8.89662	25.1634
107	260.145	267.849	212.3	198.859	268.653	222.31	219.05	260.972	238.767	10.0372	28.3896	107	181.45	495.907	239.151	140.886	202.711	239.98	200.055	198.067	175.974	230.465	34.7144	104.143	107	216.516	150.308	101.376	88.1145	94.5378	103.091	134.855	125.311	126.764	14.8893	42.1132	107	141.646	181.126	106.78	154.698	135.385	125.451	148.68	158.748	144.064	7.95225	22.4924
108	270.508	265.103	212.3	204.056	258.165	233.669	217.159	189.61	231.321	10.7309	30.3515	108	214.634	481.602	237.248	140.129	190.336	239.573	209.365	184.639	188.919	231.827	32.8031	98.4092	108	216.256	147.295	117.144	116.874	125.394	103.273	125.894	115.806	133.492	12.6301	35.7233	108	135.593	183.794	106.324	158.925	138.853	125.451	145.31	147.518	142.721	8.0932	22.891
109	276.62	291.538	196.535	191.064	267.04	221.769	222.086	269.367	242.002	13.6904	38.7222	109	180.744	443.736	252.472	139.372	198.291	232.778	209.582	203.662	188.919	227.729	29.0097	87.0291	109	212.343	149.304	104.307	108.009	115.882	103.091	120.849	108.248	127.754	13.1859	37.2954	109	136.804	186.995	107.007	169.492	122.672	106.151	146.499	146.092	140.214	10.0907	28.5408
110	268.116	294.284	200.173	191.064	263.006	196.888	215.158	265.17	236.732	14.1871	40.1273	110	176.508	477.395	215.68	143.746	202.416	225.304	170.827	200.305	193.898	222.898	32.8562	98.5685	110	212.604	152.652	117.394	100.96	108.319	103.091	118.494	113.371	128.36	13.3097	37.6455	110	139.831	185.127	105.414	174.141	122.177	115.111	143.526	159.817	143.143	10.0548	28.4393
111	275.557	300.464	198.961	178.072	259.779	207.165	210.154	239.983	233.767	14.9336	42.2387	111	151.091	490.858	250.569	141.054	194.755	217.423	168.228	182.401	195.89	221.363	35.4695	106.408	111	209.734	143.613	106.778	105.737	113.445	103.091	139.995	114.546	129.618	12.6819	35.8697	111	136.804	189.929	110.65	148.781	136.541	114.422	145.508	156.074	142.339	8.81637	24.9365
112	276.088	288.105	190.472	188.466	240.417	200.674	215.695	269.367	233.66	14.2701	40.3619	112	183.568	460.565	247.398	138.783	197.407	227.071	172.559	174.568	205.848	223.085	31.5206	94.5619	112	199.56	160.016	119.157	106.834	114.622	101.818	119.917	111.691	129.202	11.8445	33.5013	112	134.383	183.527	105.414	185.131	124.158	124.761	141.345	163.204	145.24	10.3189	29.1862
113	278.214	293.941	225.956	178.072	254.132	223.392	213.899	269.367	242.122	13.6182	38.518	113	192.041	440.37	218.217	139.372	198.291	203.154	175.373	184.639	203.856	217.257	28.8768	86.6304	113	208.169	157.338	106.634	104.171	111.765	107.273	139.995	117.57	131.614	12.785	36.1614	113	138.015	185.928	103.592	164.42	115.573	113.043	143.922	167.303	141.474	10.4385	29.5246
114	282.466	279.865	208.978	188.466	264.62	220.146	210.411	242.569	237.19	12.557	35.5165	114	175.802	484.968	241.054	141.223	200.943	191.74	177.538	195.829	210.827	224.436	33.8023	101.407	114	202.691	156.334	102.366	109.654	117.647	103.636	119.917	115.05	128.412	12.18	34.4501	114	126.513	185.394	107.918	160.616	116.563	120.626	138.57	157.143	139.168	9.36541	26.4894
115	272.368	296.687	213.829	193.662	264.62	223.392	212.95	261.234	242.343	12.7573	36.083	115	202.631	504.322	237.248	143.157	189.157	231.419	182.085	194.71	197.881	231.401	35.3202	105.961	115	200.343	134.909	106.294	107.304	115.126	101.818	141.044	115.47	127.789	11.4632	32.4229	115	136.199	178.192	112.699	165.688	117.389	116.49	141.147	139.119	138.365	8.36974	23.6732
116	277.948	298.061	194.426	183.269	262.199	200.674	207.152	231.138	231.858	15.1027	42.7168	116	193.453	467.297	235.345	141.391	207.425	231.012	181.002	191.353	233.73	231.334	31.1646	93.4938	116	197.995	146.291	108.407	107.695	115.546	103.091	123.875	100.774	125.459	11.5822	32.7594	116	137.409	187.261	104.048	172.45	112.601	108.908	142.931	140.01	138.202	10.5949	29.967
117	274.494	290.508	217.467	191.064	270.267	245.028	205.151	255.162	243.643	12.6229	35.703	117	165.917	451.309	228.367	140.297	210.371	232.099	188.364	185.758	213.814	224.033	30.0822	90.2467	117	200.865	148.921	119.157	113.57	121.849	107.273	119.437	115.05	130.765	10.9224	30.8931	117	133.777	182.193	106.097	162.306	119.7	115.111	137.579	150.883	138.456	9.06596	25.6424
118	270.242	289.821	195.639	193.662	267.04	208.787	206.396	239.083	233.834	13.3918	37.8778	118	182.862	481.602	242.323	142.484	208.014	229.245	180.136	190.234	195.89	228.088	33.1283	99.3848	118	198.256	157.338	115.546	107.304	115.126	103.091	125.894	109.172	128.966	11.5864	32.7714	118	136.199	178.459	106.097	170.76	117.554	114.422	140.156	137.337	137.623	9.17009	25.9369
119	272.9	288.448	200.49	175.473	263.006	216.901	190.452	244.181	231.481	14.7049	41.5918	119	165.917	517.785	244.226	143.073	208.309	240.252	188.797	187.996	211.823	234.242	37.0607	111.182	119	197.734	156.334	114.669	101.821	109.244	103.091	123.875	121.768	128.567	11.6146	32.8509	119	118.644	190.996	106.097	172.873	119.205	124.761	141.94	134.663	138.647	10.3242	29.2013
120	272.368	289.821	217.467	191.064	259.779	220.146	203.148	238.821	236.577	12.3081	34.8125	120	193.453	460.565	247.398	143.157	202.416	231.012	209.365	194.71	188.919	230.111	30.3821	91.1462	120	197.995	143.613	119.157	93.9888	100.84	107.273	124.437	109.172	124.559	11.8154	33.419	120	126.513	183.527	104.048	148.781	124.158	115.111	138.57	144.645	135.669	8.65007	24.4661
