# Supplementary material for: LTP and memory impairment caused by extracellular Aβ and Tau oligomers is APP-dependent
Source: eLife. 2017 Jul 11;6:e26991. doi: 10.7554/eLife.26991 (PMC5529106; doi:10.7554/eLife.26991)
Supplement: Figure 5—source data 6. — DOI: http://dx.doi.org/10.7554/eLife.26991.022 [file elife-26991-fig5-data6.xlsx]

## Sheet: Fig 5F
Figure 5F
	WT VEHICLE											BACE KO VEHICLE													WT Tau												BACE KO Tau
	Slice 1	Slice 2	Slice 3	Slice 4	Slice 5	Slice 6	Slice 7	Slice 8	AVG	ERROR	STDEV		Slice 1	Slice 2	Slice 3	Slice 4	Slice 5	Slice 6	Slice 7	Slice 8	Slice 9	AVG	ERROR	STDEV		Slice 1	Slice 2	Slice 3	Slice 4	Slice 5	Slice 6	Slice 7	Slice 8	AVG	ERROR	STDEV		Slice 1	Slice 2	Slice 3	Slice 4	Slice 5	Slice 6	Slice 7	Slice 8	Slice 9	AVG	ERROR	STDEV
Baseline 1	92.2549	96.9615	103.55	104.926	79.87	79.8935	102.322	90.2391	93.7521	3.54553	10.0283	Baseline 1	110.847	100.842	97.0559	91.4288	95.1679	88.405	100.976	100.195	115.512	100.048	2.88644	8.65933	Baseline 1	99.4347	104.077	105.86	127.451	110.144	96.6928	98.3592	98.8563	105.109	3.57029	10.0983	Baseline 1	104.562	98.6389	91.4361	101.906	91.1432	101.359	102.745	96.2867	93.0942	97.9079	1.70599	5.11797
2	94.9524	90.9676	85.6964	99.4587	81.6852	113.848	102.269	97.4727	95.7937	3.55857	10.0652	2	93.902	105.164	104.668	91.6812	100.177	100.227	88.9857	93.2903	95.5955	97.0767	1.91396	5.74187	2	99.0432	107.231	106.321	88.2354	113.12	95.3591	111.422	101.419	102.769	2.97727	8.42099	2	96.7702	96.7174	96.1746	100.635	86.3313	101.726	88.6274	104.576	103.213	97.1968	2.09476	6.28428
3	96.5325	99.4296	89.2671	119.527	102.258	102.863	104.018	110.991	103.111	3.22284	9.11557	3	95.3144	100.042	98.959	96.9802	101.945	99.0451	100.648	114.004	92.6084	99.9494	2	6.00001	3	99.8257	113.538	101.939	127.451	110.144	111.025	98.3592	113.693	109.497	3.36405	9.51498	3	100.792	106.325	96.4379	83.2534	100.767	91.2596	102.745	100.113	93.0942	97.1985	2.3433	7.0299
4	96.5709	104.013	96.4085	109.574	102.863	102.364	101.161	96.998	101.244	1.60459	4.53845	4	93.902	72.8874	109.109	100.48	94.284	104.037	97.2326	100.195	90.6164	95.8603	3.42774	10.2832	4	98.1489	99.8717	98.4795	83.3334	75.9098	94.0254	113.66	90.3582	94.2233	4.03589	11.4152	4	95.5134	111.449	103.633	98.6023	97.3703	105.592	106.667	108.402	77.3087	100.504	3.39976	10.1993
5	93.3339	104.718	103.908	101.059	100.442	107.856	104.322	90.4764	100.765	2.11167	5.97271	5	110.847	109.331	104.034	105.391	107.248	108.897	86.6041	96.0521	112.524	104.548	2.75761	8.27282	5	102.956	91.4615	84.3342	98.0393	108.655	95.3591	122.403	102.453	100.708	4.0779	11.5341	5	106.573	103.123	99.0704	101.906	97.3704	97.3191	110.588	96.9243	105.012	101.987	1.59295	4.77885
6	101.696	90.9676	94.6231	124.723	81.6852	97.8695	91.9629	104.232	98.4699	4.48881	12.6963	6	97.4323	100.042	100.228	96.9802	100.766	105.45	97.6461	106.907	107.545	101.444	1.38177	4.1453	6	102.061	100.923	86.9696	78.4314	102.701	106.695	98.6874	93.4692	96.2424	3.33712	9.43881	6	99.2836	103.443	103.721	111.055	101.899	96.0338	100.392	112.228	114.546	104.734	2.13234	6.39702
7	99.8558	94.2408	82.1257	98.9016	102.258	93.8748	101.161	104.469	97.1108	2.5037	7.08154	7	87.1576	100.756	93.2498	106.905	96.9357	96.7531	98.9451	98.8139	90.6164	96.6815	1.93698	5.81093	7	100.72	99.8717	101.939	73.5295	90.7938	102.694	100.217	97.9674	95.9666	3.4616	9.79087	7	106.321	98.6389	96.1746	94.3215	99.3518	97.3191	74.5098	98.1995	77.3087	93.5717	3.52034	10.561
8	94.644	106.544	85.6964	99.3118	102.863	112.35	97.3099	97.4727	99.5239	2.83192	8.00987	8	99.5503	107.119	92.6155	101.186	111.373	101.102	96.78	98.8139	116.507	102.783	2.50538	7.51614	8	98.1489	92.5127	94.8759	68.6275	107.167	107.362	89.6161	93.9831	94.0367	4.29924	12.1601	8	99.2836	100.56	107.494	96.8234	105.579	101.359	85.4902	100.113	103.213	99.9906	2.11123	6.3337
9	88.2086	102.603	114.262	101.771	100.442	91.3782	105.276	111.465	101.926	3.15239	8.9163	9	98.8447	90.0374	97.0559	104.803	101.945	98.2478	100.028	96.0521	90.6167	97.5144	1.61245	4.83735	9	99.6022	100.923	108.053	93.1373	113.12	94.0254	98.3592	94.3122	100.192	2.51974	7.1269	9	100.792	94.7958	98.1929	99.8729	96.5212	99.339	106.667	107.764	111.713	101.74	1.89377	5.68131
10	103.315	107.892	91.0524	90.9442	100.442	90.8788	103.247	117.749	100.69	3.38193	9.56554	10	100.963	100.756	104.668	103.204	99.5895	99.8785	100.461	94.4791	95.5955	99.955	1.07894	3.23682	10	100.049	104.077	110.689	132.353	93.7709	100.694	98.3592	113.693	106.711	4.32353	12.2288	10	96.7702	93.8711	101.264	101.144	104.344	102.277	95.6863	96.9241	95.9275	98.6898	1.20277	3.6083
11	90.3666	107.892	114.262	99.1649	81.6852	79.8935	93.3671	110.991	97.2027	4.63117	13.0989	11	90.5025	95.0395	97.056	101.186	104.596	95.1224	106.956	98.814	89.6207	97.6548	1.96435	5.89304	11	101.838	89.4133	105.86	137.255	99.7245	106.695	89.6161	110.235	105.08	5.32646	15.0655	11	100.289	101.521	102.012	102.16	102.182	92.3614	106.667	84.171	129.396	102.307	4.05772	12.1731
12	109.789	101.898	101.764	86.6135	102.258	113.848	103.247	88.1124	100.941	3.33641	9.43678	12	97.4323	110.046	98.1355	97.4007	88.3913	105.858	103.708	101.576	105.553	100.9	2.12981	6.38943	12	100.273	96.4925	101.939	127.451	95.2593	89.3575	79.7802	90.3915	97.618	4.93024	13.9448	12	97.7755	90.6325	102.142	96.8234	101.899	111.091	102.478	122.722	103.213	103.197	3.06129	9.18387
13	110.328	101.193	105.335	93.1096	117.99	102.863	101.161	97.4727	103.681	2.72283	7.70133	13	105.199	105.758	99.5934	99.083	98.9983	103.412	101.543	101.576	108.541	102.634	1.11318	3.33953	13	98.1489	104.077	105.418	83.3334	93.7709	100.694	102.731	88.597	97.0962	2.79184	7.89652	13	97.4657	98.6389	101.352	98.3482	93.6907	101.359	105.098	78.4321	98.3561	96.9712	2.54347	7.63042
14	111.407	96.6089	105.335	84.4482	122.225	102.364	93.6076	97.9473	101.743	4.08015	11.5404	14	120.731	101.471	103.399	102.279	98.409	96.8125	109.338	98.814	95.5955	102.983	2.60685	7.82056	14	100.161	94.6153	100.147	93.1373	96.4587	98.6933	98.3592	110.235	98.9758	1.83922	5.2021	14	101.294	102.482	101.966	111.309	110.108	100.257	97.2549	98.1995	96.3323	102.134	1.76808	5.30425
15	116.802	94.2408	126.759	86.4666	121.62	107.856	95.7012	83.9548	104.175	5.79457	16.3895	15	97.4323	100.756	100.228	101.102	100.177	96.7539	110.204	100.487	93.6038	100.083	1.51015	4.53046	15	99.714	100.923	87.4309	88.2354	89.3054	100.694	100.217	100.479	95.8747	2.22129	6.28276	15	96.5188	99.2794	99.0704	101.906	111.523	101.359	114.51	95.0111	98.3561	101.948	2.22277	6.6683
Drugs 1	96.5709	98.0193	112.477	90.9442	125.856	107.856	101.161	132.928	108.226	5.22326	14.7736	Drugs 1	89.7965	96.4687	95.1529	90.756	103.123	100.227	112.802	79.4811	106.549	97.1507	3.31258	9.93774	Drugs 1	101.055	113.538	108.595	72.6609	93.7709	79.3548	111.422	79.8555	95.0316	5.68444	16.078	Drugs 1	95.5134	94.4756	100.211	95.5527	98.2195	102.828	111.373	97.5619	112.927	100.962	2.2843	6.85289
2	101.446	90.615	92.8378	119.527	130.696	102.863	104.018	83.9548	103.245	5.44876	15.4114	2	90.5025	104.329	100.228	97.3166	90.1591	99.0451	88.1196	114.004	110.532	99.3596	3.02409	9.07228	2	99.0432	95.6666	105.959	61.1881	89.3054	90.0243	102.731	81.7817	90.7124	5.04401	14.2666	2	93.5026	95.1161	98.1929	102.414	101.05	107.602	112.941	79.0697	114.142	100.448	3.60899	10.827
3	96.5709	97.3141	105.335	126.603	79.87	93.8748	102.269	88.1124	98.7436	4.87653	13.7929	3	87.1576	97.1833	97.6904	102.784	102.829	104.037	88.9857	90.5285	91.6124	95.8674	2.16639	6.49917	3	98.7079	103.026	100.689	72.6609	81.8634	89.3575	80.8731	86.2798	89.1821	3.82377	10.8153	3	95.262	107.286	96.6134	96.8234	99.6348	106.5	105.882	73.3309	107.261	98.7326	3.58156	10.7447
4	93.3339	93.4357	110.691	106.509	81.6852	97.8695	102.322	83.9548	96.2252	3.61797	10.2332	4	110.141	104.443	104.034	100.48	102.829	108.897	100.976	96.0521	108.541	104.044	1.53011	4.59033	4	99.8257	107.231	105.959	61.1881	108.655	100.027	101.638	88.5078	96.629	5.53067	15.6431	4	90.7378	93.8711	101.264	94.5362	86.8974	96.401	102.745	104.576	98.7608	96.6433	1.92945	5.78835
5	101.696	92.3779	103.908	124.723	79.87	91.3782	97.3099	97.9473	98.6514	4.55905	12.8949	5	89.666	87.8765	102.131	103.914	107.248	105.45	97.2326	116.574	114.516	102.734	3.29486	9.88458	5	100.832	107.231	100.094	76.4852	108.655	106.695	87.4304	89.2536	97.0845	4.07771	11.5335	5	100.038	97.0376	95.6481	90.4701	88.0295	105.592	88.6274	102.663	105.012	97.0131	2.28021	6.84062
6	99.8558	94.2408	114.262	107.416	81.6852	102.364	102.269	97.4727	99.9456	3.39148	9.59255	6	95.4448	115.248	93.8842	102.873	94.284	96.7531	86.6041	108.288	91.6124	98.3324	2.97115	8.91344	6	100.944	116.692	101.478	65.0124	90.7938	124.034	93.9877	100.765	99.2133	6.26781	17.728	6	95.5134	95.4364	100.211	94.3215	104.344	116.967	102.478	98.1995	95.9275	100.378	2.37073	7.11218
7	94.644	102.603	101.764	107.973	102.258	97.8695	105.276	90.9511	100.417	1.98257	5.60756	7	118.613	91.478	97.0559	101.485	99.5895	101.102	97.6461	94.4791	107.545	100.999	2.67524	8.02571	7	98.9314	89.4133	100.555	65.0124	108.655	92.6917	111.422	91.7021	94.798	5.08643	14.3866	7	97.4657	99.2795	105.037	99.3646	104.73	94.5648	82.353	84.171	116.57	98.1707	3.51793	10.5538
8	88.2086	107.892	105.335	73.6215	102.863	113.848	104.322	69.9624	95.7565	5.82859	16.4857	8	87.1576	107.119	98.1355	97.4086	100.766	98.2478	98.9451	94.4791	129.452	101.301	3.93215	11.7964	8	101.279	98.8204	101.939	103.255	108.655	84.0227	101.638	92.2305	98.9799	2.68025	7.5809	8	107.83	102.162	101.44	94.2821	98.7856	97.87	110.588	105.214	125.475	104.85	3.08076	9.24228
9	103.315	107.892	105.335	86.6135	100.442	90.8788	102.269	125.932	102.835	4.17831	11.818	9	105.904	95.0395	98.3247	98.7097	96.9357	99.8785	96.78	119.336	111.528	102.493	2.72475	8.17424	9	99.3786	107.231	99.8633	95.6064	90.7938	94.6923	121.31	94.8462	100.465	3.44303	9.73835	9	106.321	93.835	100.123	101.906	92.5584	99.1553	100.392	107.764	102.404	100.496	1.67379	5.02138
10	90.3666	101.898	126.759	93.1096	102.863	102.863	97.3099	104.944	102.514	3.91299	11.0676	10	112.259	110.046	103.399	101.919	111.373	95.1224	100.976	100.487	98.583	103.796	2.01757	6.0527	10	98.7079	105.128	98.4795	76.4852	108.655	112.03	91.8019	100.024	98.914	3.92027	11.0882	10	99.2836	105.364	102.012	97.3316	107.56	96.401	74.5098	94.3735	83.7847	95.6246	3.50121	10.5036
11	109.789	101.193	112.477	109.992	100.442	107.856	104.322	104.944	106.377	1.53805	4.35025	11	110.847	105.758	110.377	100.48	89.8645	105.858	100.461	101.384	120.49	105.058	2.8566	8.56979	11	100.72	103.026	97.557	76.4852	110.144	101.361	84.1518	93.1285	95.8215	3.85459	10.9024	11	100.792	97.0376	95.9991	99.6188	105.862	107.602	102.478	100.113	88.6419	99.7937	1.87261	5.61784
12	110.328	96.6089	92.8378	99.7514	124.04	102.863	105.276	88.1124	102.477	3.9545	11.185	12	119.32	101.471	123.064	99.0567	105.48	103.412	106.956	93.0982	105.553	106.379	3.14152	9.42456	12	99.0432	100.923	104.476	68.8366	87.817	105.362	98.3592	84.4436	93.6575	4.41793	12.4958	12	108.584	95.1161	101.176	83.2534	106.145	106.5	106.667	87.3592	92.7262	98.6141	3.11633	9.349
13	111.407	90.615	103.908	99.4587	117.385	93.8748	93.3671	125.932	104.493	4.48899	12.6968	13	87.1576	101.471	113.549	98.276	104.596	96.8125	106.956	94.4791	115.512	102.09	3.03931	9.11792	13	99.155	100.923	105.168	84.1337	117.586	112.03	96.1734	91.9549	100.89	3.79618	10.7372	13	100.289	108.247	95.9991	89.4536	104.447	96.401	95.6863	121.155	103.213	101.655	3.07294	9.21883
14	103.315	97.3141	85.6964	119.527	113.754	97.8695	101.161	111.465	103.763	3.82038	10.8057	14	103.787	96.4687	88.8094	102.093	88.3913	96.7539	103.708	102.765	116.507	99.9203	2.87601	8.62803	14	99.0432	105.128	98.2489	118.552	111.632	97.3596	101.638	102.042	104.205	2.61211	7.38817	14	97.7755	92.554	98.0174	99.6188	105.579	99.8898	106.667	105.851	78.1182	98.2301	2.94606	8.83819
15	90.3666	93.4357	71.4137	103.642	117.99	91.3782	103.247	97.9473	96.1775	4.74749	13.4279	15	105.904	104.329	107.84	103.22	98.9983	105.858	101.543	97.2409	93.6038	102.06	1.55223	4.65668	15	100.496	100.923	106.782	65.0124	104.19	114.698	86.3375	95.6915	96.7663	5.38911	15.2427	15	97.2728	101.521	97.4909	94.5362	95.955	105.592	117.647	93.7359	105.012	100.974	2.52977	7.5893
16	96.5709	102.603	85.6964	93.1096	122.225	102.863	102.322	97.4727	100.358	3.7405	10.5797	16	97.4323	96.4687	92.6155	102.873	99.5895	103.412	100.461	101.384	111.528	100.64	1.76773	5.30319	16	88.2086	102.603	85.6964	87.9579	104.19	89.3575	111.422	101.812	96.4059	3.4243	9.68538	16	106.573	93.8711	101.264	94.5362	104.344	107.602	105.882	104.576	98.7608	101.934	1.71706	5.15119
17	101.696	93.4357	105.335	107.973	121.62	107.856	103.247	104.944	105.763	2.79158	7.89579	17	105.199	107.119	103.399	102.279	105.48	98.2478	86.6041	104.338	93.6038	100.697	2.24342	6.73025	17	101.696	93.4357	105.335	80.3094	98.2361	104.028	101.638	88.6345	96.6641	3.05988	8.65463	17	95.5134	99.2794	102.012	94.3215	92.5584	97.87	100.392	107.764	95.5228	98.3594	1.55062	4.65186
18	94.644	101.898	92.8378	104.926	125.856	79.8935	101.161	88.1124	98.666	4.8349	13.6752	18	95.4448	109.331	97.0559	101.102	101.945	96.7531	97.6461	108.288	115.512	102.564	2.3205	6.96149	18	94.644	101.898	92.8378	84.1337	98.2361	82.0222	101.638	92.7904	93.525	2.60799	7.37652	18	97.4657	97.0376	102.142	101.906	111.523	96.401	102.478	97.5619	119.403	102.88	2.59028	7.77085
19	101.446	97.3141	101.764	99.4587	124.04	93.8748	102.322	110.991	103.901	3.36099	9.50632	19	108.729	90.0374	97.056	99.0567	100.766	101.102	110.204	61.529	105.553	97.1147	4.89735	14.692	19	101.446	97.3141	101.764	84.1337	110.144	98.0265	93.9877	102.283	98.6373	2.66408	7.53515	19	100.038	95.1161	100.123	94.5362	110.108	102.828	112.941	98.1995	102.404	101.81	2.07794	6.23381
20	99.8558	96.6089	92.8378	101.771	117.385	113.848	93.3671	83.9548	99.9535	3.92195	11.093	20	97.4323	97.1833	100.228	106.905	89.8645	99.8785	88.1196	90.5285	93.6038	95.9715	2.00939	6.02817	20	99.8558	96.6089	92.8378	91.7822	98.2361	91.358	101.638	90.7404	95.3821	1.49983	4.24215	20	101.294	97.0376	101.44	99.873	93.6907	100.257	114.51	95.0111	95.5228	99.8485	2.06719	6.20158
Tetanus												Tetanus													Tetanus												Tetanus
1	218.426	368.101	285.655	246.849	200.885	259.091	292.254	308.571	272.479	18.8483	53.3111	1	183.568	439.248	274.675	154.596	184.443	199.757	187.065	377.111	238.989	248.828	32.6997	98.0992	1	160.414	174.674	198.698	225.631	183.076	203.372	236.062	228.811	201.342	9.71099	27.4668	1	188.422	143.155	129.169	193.139	211.724	217.04	167.917	152.401	189.389	176.928	10.1887	30.566
2	205.405	338.836	249.948	223.463	203.305	215.819	292.026	309.733	254.817	18.4595	52.2113	2	186.393	487.212	270.869	154.933	190.041	231.85	170.827	328.993	232.018	250.348	34.6698	104.009	2	144.648	153.972	212.402	217.983	175.634	224.908	177.047	193.822	187.552	10.5213	29.7586	2	216.573	150.52	164.662	165.947	213.705	241.462	161.078	156.864	203.504	186.035	10.974	32.9221
3	219.489	322.97	223.168	223.463	196.044	203.378	285.617	310.445	248.072	17.7568	50.2237	3	211.809	426.626	258.182	156.194	206.541	222.392	168.228	289.827	192.187	236.887	27.447	82.3409	3	155.143	155.266	218.658	202.686	171.169	196.639	153.003	196.828	181.174	9.05783	25.6194	3	216.893	161.409	175.317	152.478	215.12	275.615	129.926	167.705	183.507	186.441	14.5102	43.5305
4	218.426	347.651	191.032	239.053	202.095	202.297	285.136	282.934	246.078	19.3171	54.637	4	173.684	449.346	241.688	156.194	193.282	229.748	172.559	298.779	183.225	233.167	30.8094	92.4283	4	159.855	158.501	225.807	225.631	159.262	183.845	142.074	170.643	178.202	11.1751	31.608	4	221.692	172.618	166.793	132.402	221.065	262.762	101.814	188.11	177.233	182.721	16.1969	48.5907
5	216.566	347.651	207.1	259.841	205.726	200.133	273.201	266.144	247.045	17.8119	50.3797	5	196.277	456.919	230.904	158.045	197.113	235.396	175.373	302.136	182.229	237.155	30.9407	92.8221	5	155.049	161.089	223.722	202.686	150.684	193.945	147.539	175.253	176.246	9.84147	27.8359	5	222.651	152.762	170.629	125.032	225.594	170.878	123.088	154.951	189.389	170.553	12.3511	37.0533
6	199.825	342.01	217.812	228.66	203.305	194.724	256.552	308.121	243.876	19.2871	54.5522	6	171.566	439.248	245.495	159.391	198.291	235.396	177.538	293.184	201.149	235.695	29.0461	87.1382	6	154.713	162.382	227.595	229.455	138.423	180.479	140.982	157.297	173.916	12.7696	36.1178	6	226.49	166.213	172.334	124.778	221.631	159.163	129.926	152.401	194.878	171.979	12.0982	36.2947
7	208.328	363.165	228.524	233.857	196.044	214.196	236.397	291.33	246.48	19.4807	55.0998	7	178.626	483.004	258.816	155.353	195.639	230.93	182.085	275.28	207.124	240.762	32.927	98.7811	7	152.366	174.674	220.445	156.795	123.539	153.546	203.276	169.184	169.228	10.8434	30.6697	7	231.929	159.488	166.651	117.154	214.837	175.321	120.049	171.53	188.604	171.729	12.6957	38.087
8	213.111	350.824	223.168	220.865	202.095	203.378	242.267	291.33	243.38	18.4105	52.0727	8	189.922	397.174	250.569	160.821	185.916	235.922	181.002	274.161	204.136	231.069	24.0804	72.2413	8	154.378	175.321	222.232	210.334	153.308	155.566	167.211	173.48	176.479	9.25677	26.1821	8	224.571	145.717	175.317	126.048	224.178	163.606	121.569	170.893	183.115	170.557	12.3712	37.1137
9	216.034	373.743	217.812	233.857	205.726	219.605	250.295	303.923	252.624	20.4849	57.94	9	196.983	486.37	256.278	159.979	189.157	239.074	188.364	283.113	203.14	244.718	32.8055	98.4164	9	155.496	166.911	232.063	133.849	153.308	149.506	174.861	179.233	168.153	10.4871	29.6621	9	229.369	162.37	175.175	135.451	215.687	174.917	124.608	167.067	165.47	172.235	11.1551	33.4653
10	213.377	346.946	237.451	231.258	200.28	215.819	235.983	303.923	248.13	17.9111	50.6601	10	159.563	468.699	262.622	159.138	194.755	219.108	180.136	299.898	202.145	238.452	32.6791	98.0372	10	156.949	163.029	224.318	248.577	128.005	167.012	161.746	167.593	177.154	13.8749	39.2441	10	218.173	145.717	174.891	122.49	213.988	175.725	115.49	178.545	208.21	172.581	12.6949	38.0846
11	213.377	343.42	224.953	239.053	200.28	234.751	235.916	295.528	248.41	16.7818	47.4662	11	175.096	459.443	263.256	158.297	187.979	211.226	188.797	298.779	190.195	237.008	31.5337	94.6011	11	153.036	161.736	226.999	233.28	128.005	181.826	174.861	172.512	179.032	12.5997	35.6372	11	216.573	157.246	172.334	111.817	216.536	165.626	116.25	149.85	193.31	166.616	12.7162	38.1485
12	216.832	373.037	196.388	262.439	194.229	229.342	233.171	278.737	248.022	20.6511	58.4102	12	154.621	473.748	254.375	157.204	200.354	210.569	191.611	269.685	187.208	233.264	32.7085	98.1255	12	153.483	155.913	224.914	217.983	145.866	164.319	151.91	169.078	172.933	10.9079	30.8523	12	223.931	166.213	173.186	124.523	228.141	155.123	96.4951	195.124	204.681	174.157	14.7593	44.2778
13	206.203	349.414	217.812	220.865	199.675	240.16	233.615	278.737	243.31	17.4499	49.3558	13	203.337	417.37	250.569	154.26	208.309	217.794	196.808	266.328	200.153	234.992	25.1897	75.569	13	159.185	157.854	217.764	225.631	133.958	156.912	126.774	156.735	166.852	12.7308	36.0083	13	219.132	163.331	174.749	126.557	218.234	179.361	126.887	174.719	187.82	174.532	11.053	33.159
14	220.286	349.414	246.377	233.857	190.599	217.983	243.178	287.132	248.603	17.4249	49.2851	14	180.744	468.699	267.697	155.858	194.755	240.257	184.25	251.78	203.14	238.576	31.2463	93.739	14	160.414	154.619	219.849	202.686	159.262	154.892	185.79	169.967	175.935	8.65287	24.474	14	221.692	170.056	172.618	125.032	206.629	166.838	123.848	169.618	180.37	170.744	10.7273	32.1819
15	217.894	370.217	244.592	228.66	203.91	219.605	246.181	257.748	248.601	18.4558	52.2009	15	186.393	445.138	267.063	155.69	187.095	242.227	185.116	264.09	203.14	237.328	28.9844	86.9532	15	160.302	164.323	212.402	206.51	125.028	152.867	134.424	165.791	165.206	10.9158	30.8746	15	211.455	162.69	170.345	132.91	214.837	163.202	98.0147	146.662	187.428	165.283	12.3796	37.1388
16	216.832	366.691	210.67	213.069	200.885	232.587	237.174	309.733	248.455	20.7263	58.6229	16	164.505	461.126	263.891	155.606	193.282	239.994	196.808	239.471	198.162	234.76	30.6959	92.0877	16	152.925	158.501	219.253	298.292	125.028	170.368	149.725	163.589	179.71	19.3783	54.8102	16	211.455	167.174	174.323	126.557	221.631	153.911	142.843	148.575	199.583	171.783	10.9292	32.7875
17	225.069	376.211	216.026	233.857	200.28	236.373	232.17	278.737	249.84	19.7153	55.7632	17	180.744	472.065	267.063	158.634	187.389	233.557	198.756	256.256	219.073	241.504	31.1606	93.4818	17	153.584	158.501	243.085	267.698	128.005	179.796	106.009	159.206	174.486	19.456	55.0299	17	209.215	175.5	178.301	136.722	219.366	165.222	140.564	161.328	185.468	174.632	9.27375	27.8213
18	225.335	374.8	230.309	215.668	191.809	236.914	234.815	313.931	252.948	21.3623	60.4218	18	187.804	435.882	271.503	156.867	192.398	243.146	196.158	254.018	203.14	237.88	27.5656	82.6969	18	152.354	167.558	217.764	237.104	157.773	179.796	170.489	155.469	179.789	11.013	31.1494	18	203.137	172.618	174.891	122.999	234.085	159.567	110.931	160.69	172.136	167.895	12.4131	37.2394
19	221.083	372.685	223.168	220.865	197.86	230.423	233.171	261.946	245.15	19.2707	54.5058	19	193.453	447.663	256.279	156.363	199.47	232.769	203.953	242.828	200.153	236.992	28.1512	84.4537	19	156.714	157.207	212.7	133.849	154.796	197.969	163.932	150.343	165.939	9.23408	26.1179	19	204.097	175.821	168.072	141.042	231.821	148.256	112.451	168.342	170.567	168.941	11.57	34.7099
20	235.432	391.019	207.1	223.463	200.885	233.669	237.174	286.42	251.895	21.87	61.8576	20	196.983	454.394	242.957	153.419	197.407	234.739	198.107	232.757	203.14	234.878	28.8897	86.6692	20	157.273	159.148	215.679	145.322	128.005	181.812	150.817	150.905	161.12	9.43037	26.6731	20	202.817	173.579	165.798	135.451	236.916	141.792	141.324	174.719	175.273	171.963	10.8091	32.4272
21	216.034	374.095	241.021	215.668	199.675	216.36	233.171	295.978	249	20.6441	58.3904	21	165.917	447.663	237.882	157.204	189.157	227.909	204.386	233.876	187.208	227.911	29.1024	87.3073	21	154.031	149.444	213.295	172.092	116.097	197.969	128.96	149.034	160.115	11.6392	32.9207	21	194.18	173.259	167.077	134.689	228.99	154.719	116.25	156.227	192.918	168.701	11.2749	33.8247
22	215.769	387.494	237.451	205.274	198.465	222.31	238.175	312.057	252.124	22.9952	65.0402	22	222.4	447.663	246.129	157.624	190.925	228.171	207.85	233.876	211.107	238.416	27.5602	82.6805	22	155.261	148.797	217.168	195.037	142.889	179.796	145.353	138.514	165.352	10.1555	28.7241	22	186.502	160.128	166.225	135.197	219.083	142.6	132.966	140.923	221.934	167.284	11.5488	34.6464
23	220.286	377.621	246.377	210.471	191.809	221.228	227.167	302.499	249.682	21.6451	61.2215	23	190.628	461.968	230.27	160.232	182.675	229.354	204.819	229.4	207.124	232.941	29.7085	89.1255	23	158.055	157.854	200.188	114.728	142.889	207.396	170.489	150.65	162.781	10.6467	30.1134	23	193.54	179.984	169.492	137.484	230.122	133.713	132.966	173.443	214.876	173.958	11.7255	35.1765
24	219.489	394.193	224.536	220.865	188.178	221.228	232.17	309.733	251.299	23.808	67.3391	24	204.043	441.772	240.42	158.97	181.202	238.155	183.601	241.709	214.094	233.774	27.7733	83.3199	24	156.379	153.972	205.55	122.376	119.074	181.812	132.238	149.711	152.639	10.4656	29.6012	24	189.701	170.376	173.897	145.108	222.763	138.964	138.284	192.573	176.057	171.969	9.34481	28.0344
25	235.167	379.384	203.112	218.266	202.7	219.064	228.167	304.373	248.779	21.8686	61.8538	25	189.216	472.065	261.988	152.578	180.907	226.201	209.365	223.805	182.229	233.15	31.7013	95.1038	25	155.82	147.503	206.742	202.686	132.47	179.796	146.446	142.938	164.3	10.051	28.4284	25	185.223	172.298	171.339	144.091	213.422	140.176	120.049	172.168	194.094	168.096	9.67003	29.0101
26	226.398	375.506	217.395	220.865	202.095	220.687	239.349	297.852	250.018	20.606	58.2826	26	217.458	467.858	243.591	157.54	183.559	228.04	199.839	217.091	220.069	237.227	30.0542	90.1626	26	154.255	156.56	207.337	168.267	147.354	164.319	166.118	153.728	164.742	6.58658	18.6297	26	175.306	177.422	167.645	139.517	210.592	143.004	138.284	177.269	143.12	163.573	8.16837	24.5051
27	231.712	388.095	185.258	218.266	195.439	203.919	227.167	282.934	241.599	23.4311	66.2731	27	201.925	439.248	231.539	155.269	183.265	213.328	210.448	245.066	202.145	231.359	27.3838	82.1513	27	155.373	159.148	206.444	172.092	119.074	167.675	132.238	144.936	157.122	9.44021	26.701	27	179.145	181.906	170.771	138.755	213.139	145.024	131.446	162.603	192.133	168.325	8.89191	26.6757
28	225.335	380.691	203.112	220.865	193.624	232.046	230.795	287.582	246.756	21.5197	60.8669	28	197.689	483.004	235.979	155.858	203.3	207.285	188.364	233.876	187.208	232.507	32.348	97.0439	28	159.173	148.797	213.295	168.267	142.889	177.775	135.517	150.42	162.017	8.76513	24.7915	28	170.507	174.219	175.459	144.091	202.666	163.287	126.887	136.459	197.231	165.645	8.64886	25.9466
29	221.083	372.581	203.415	202.676	196.044	222.31	237.347	303.923	244.922	21.881	61.8888	29	173.684	472.065	233.442	157.961	200.648	191.259	206.984	224.924	227.04	232.001	31.1491	93.4473	29	155.484	153.325	210.316	195.037	116.097	185.179	166.118	151.724	166.66	10.4683	29.6088	29	166.669	170.056	170.913	133.418	222.48	165.839	130.686	152.401	185.075	166.393	9.19473	27.5842
30	227.726	380.431	194.926	236.455	202.7	213.655	232.852	240.507	241.157	20.72	58.605	30	175.096	502.358	246.129	160.568	197.996	194.819	203.087	233.876	197.166	234.566	34.5941	103.782	30	158.391	152.031	212.104	202.686	122.051	181.139	131.146	133.735	161.66	11.9451	33.7858	30	171.467	177.102	175.601	148.412	209.025	180.296	139.804	183.646	193.702	175.451	7.04291	21.1287
31	232.775	374.437	222.818	207.872	205.121	208.787	237.347	308.121	249.66	21.3578	60.4091	31	168.741	485.529	223.926	157.372	188.273	204.408	200.055	242.828	228.035	233.241	32.8562	98.5685	31	158.95	153.325	210.912	126.201	147.354	163.638	114.752	151.761	153.362	10.103	28.5756	31	153.553	174.54	176.454	127.827	205.8	158.61	144.363	172.806	188.212	166.907	7.84699	23.541
32	226.663	393.477	222.818	220.865	209.356	220.687	232.524	295.528	252.74	22.1792	62.7323	32	158.151	440.931	240.42	156.11	181.791	228.303	209.365	228.281	183.225	225.175	28.857	86.5711	32	163.757	150.738	211.508	225.631	125.028	173.059	137.703	140.93	166.044	12.6932	35.9019	32	152.593	178.383	177.59	137.992	211.956	153.507	126.127	172.168	174.096	164.935	8.50091	25.5027
33	233.572	376.812	214.329	236.455	212.987	240.16	232.598	253.55	250.058	18.7032	52.9006	33	196.277	455.236	237.248	160.484	177.666	209.768	209.582	220.448	192.187	228.766	29.3035	87.9104	33	158.167	147.503	206.742	160.619	172.657	167.667	185.79	151.769	168.864	6.90233	19.5227	33	158.031	190.873	171.481	139.009	220.458	164.138	127.647	165.154	173.312	167.789	9.05706	27.1712
34	231.181	369.408	233.732	233.857	200.078	226.096	234.627	312.319	255.162	19.8692	56.1986	34	159.563	493.102	229.636	162.25	194.166	228.434	223.871	241.709	196.17	236.545	33.5399	100.62	34	163.98	153.325	201.975	168.267	145.866	197.969	125.681	133.274	161.292	9.82961	27.8023	34	152.593	185.108	173.044	141.296	214.302	125.017	124.608	167.067	190.173	163.69	10.1845	30.5536
35	231.446	377.517	237.37	226.061	210.566	209.869	234.732	256.136	247.962	19.2449	54.4328	35	189.216	485.529	229.001	161.325	196.523	220.027	212.613	222.686	252.93	241.095	31.7695	95.3084	35	158.391	149.444	196.911	130.025	136.935	191.898	132.238	137.927	154.221	9.36864	26.4985	35	153.873	182.226	172.476	135.705	210.784	153.932	175.515	135.822	199.583	168.879	8.80007	26.4002
36	238.355	360.946	216.755	220.865	211.373	232.046	243.178	284.096	250.952	17.6347	49.8784	36	183.568	513.297	240.42	156.11	193.282	205.315	214.778	221.567	199.158	236.388	35.5172	106.552	36	161.521	152.031	204.656	168.267	166.704	163.638	190.161	152.675	169.957	6.48736	18.349	36	136.598	163.971	171.481	141.804	213.715	145.003	139.804	170.255	195.662	164.255	8.94311	26.8293
37	231.712	389.858	224.031	231.258	211.373	232.046	239.304	288.294	255.985	20.7145	58.5895	37	217.458	458.602	232.808	157.793	191.514	234.409	213.696	223.805	195.174	236.14	28.9435	86.8305	37	164.651	153.325	198.996	172.092	125.028	173.059	123.495	133.778	155.553	9.43839	26.6958	37	140.117	172.938	174.323	137.738	227.787	150.105	102.574	152.401	204.289	162.475	12.4824	37.4473
38	233.838	398.673	231.37	223.463	204.112	204.46	236.346	279.899	251.52	22.6217	63.9838	38	198.395	472.065	237.882	156.279	200.648	234.137	216.51	218.209	197.166	236.81	30.494	91.4821	38	158.838	150.738	202.273	164.443	125.028	197.969	120.217	120.929	155.054	11.5513	32.6719	38	148.114	193.114	172.476	125.794	211.077	126.718	131.446	181.095	187.82	164.184	10.6437	31.9312
39	234.901	367.292	199.233	213.069	200.078	206.083	234.729	286.42	242.726	20.4781	57.9209	39	154.621	486.37	244.226	160.989	188.568	234.816	226.686	229.4	207.124	236.978	32.9581	98.8743	39	161.968	147.503	204.656	103.255	129.493	201.325	143.167	141.26	154.078	12.2231	34.5722	39	142.676	180.304	170.345	147.141	206.386	142.026	136.765	167.705	193.31	165.184	8.27177	24.8153
40	244.201	374.344	234.694	241.652	194.431	231.505	233.171	279.899	254.237	19.0219	53.802	40	194.159	523.395	234.711	160.568	190.336	227.75	214.345	231.638	214.094	243.444	35.8741	107.622	40	165.433	150.091	201.677	183.564	104.19	177.775	145.353	124.918	156.625	11.3428	32.0823	40	139.157	177.422	171.197	141.296	202.575	135.648	134.485	167.067	161.549	158.933	7.73874	23.2162
41	245.53	376.46	228.045	205.274	200.078	221.769	235.173	264.27	247.075	19.883	56.2376	41	211.809	503.2	237.248	156.026	190.041	220.276	231.016	231.638	195.174	241.825	33.7768	101.33	41	167.446	141.033	194.23	95.6064	125.028	173.059	107.102	134.576	142.26	11.9925	33.9198	41	140.117	180.945	175.886	131.385	201.696	156.059	107.132	168.342	196.054	161.957	10.4012	31.2035
42	237.824	364.824	254.64	213.069	208.146	220.146	232.654	270.341	250.206	17.966	50.8156	42	191.335	504.883	239.785	160.232	194.166	224.353	224.954	227.162	185.216	239.121	34.2834	102.85	42	165.657	148.797	206.742	172.092	141.4	196.611	168.304	144.628	168.029	8.41386	23.798	42	126.361	166.854	169.634	122.745	215.768	131.821	122.328	143.473	187.036	154.002	10.9689	32.9068
43	239.684	373.39	245.775	202.676	214.6	232.046	236.886	270.341	251.925	18.7657	53.0775	43	164.505	439.248	239.785	157.54	200.943	222.315	218.892	238.352	223.056	233.849	27.4954	82.4863	43	167.446	153.972	197.507	137.673	107.167	163.638	131.146	129.183	148.466	9.92804	28.0807	43	136.278	168.775	170.913	136.213	201.109	129.694	126.127	170.255	190.957	158.925	9.2297	27.6891
44	232.244	384.673	214.747	213.069	225.895	234.751	232.243	266.144	250.471	20.0207	56.6272	44	175.096	498.151	240.42	157.036	203.595	218.646	231.882	234.995	188.204	238.669	33.8044	101.413	44	163.533	141.033	204.358	156.795	126.516	197.285	108.195	123.536	152.656	12.2791	34.7305	44	132.759	172.298	168.64	128.59	197.005	140.75	101.814	163.241	190.957	155.117	10.4312	31.2937
45	243.138	381.852	252.424	231.258	206.532	226.637	232.021	278.737	256.575	19.3777	54.8083	45	166.623	509.09	248.032	156.867	190.336	216.607	239.027	223.805	218.077	240.941	35.0632	105.19	45	167.893	147.503	201.677	145.322	111.632	186.517	148.632	144.268	156.68	9.91223	28.036	45	130.2	173.259	164.52	118.679	193.194	134.372	122.328	171.53	177.233	153.924	9.17968	27.539
46	235.432	377.974	249.1	218.266	219.441	212.574	234.83	324.912	259.066	21.1779	59.9003	46	177.214	498.151	246.129	156.699	195.639	201.116	170.827	236.114	207.124	232.112	34.6333	103.9	46	162.303	156.56	200.486	206.51	113.12	173.053	126.774	133.059	158.983	11.959	33.8252	46	120.923	172.938	166.509	134.689	190.555	136.073	126.887	164.516	178.017	154.568	8.38275	25.1483
47	242.607	371.627	247.992	220.865	204.112	226.096	230.229	261.946	250.684	18.3749	51.972	47	168.741	532.651	255.644	154.849	188.863	208.182	168.228	223.805	225.048	236.223	38.6138	115.842	47	164.986	149.444	199.592	141.498	128.005	182.48	181.418	136.218	160.455	9.0612	25.6289	47	122.202	173.259	167.219	136.213	192.314	157.247	153.48	133.908	209.778	160.625	9.48084	28.4425
48	240.215	386.083	233.353	228.66	206.532	222.31	232.654	275.701	253.189	20.2145	57.1754	48	160.975	509.932	233.442	154.933	190.631	217.151	172.559	227.162	212.102	230.987	36.1531	108.459	48	165.992	150.091	199.592	160.619	126.516	192.571	146.446	133.599	159.428	9.2217	26.0829	48	132.759	179.664	167.077	125.54	189.09	137.261	108.652	141.56	177.625	151.025	9.34818	28.0445
49	247.124	380.089	212.299	220.865	207.339	233.669	230.048	304.373	254.476	20.9091	59.1398	49	199.101	473.748	246.129	158.55	192.398	219.053	175.373	211.495	188.204	229.339	31.6966	95.0898	49	165.545	143.621	201.975	133.849	144.377	197.285	183.604	137.348	163.451	9.77794	27.6562	49	122.522	179.664	168.121	133.418	192.315	134.284	113.211	170.255	193.702	156.388	10.2619	30.7858
50	245.796	373.743	203.433	236.455	213.793	221.769	227.394	279.899	250.285	19.4542	55.0247	50	177.92	495.627	255.644	155.269	187.979	225.984	177.538	212.614	198.162	231.86	34.4261	103.278	50	165.881	135.211	203.763	149.146	141.4	177.775	137.703	123.848	154.341	9.34636	26.4355	50	120.283	173.259	167.972	139.009	188.21	158.522	101.814	133.909	188.212	152.354	10.1322	30.3967
51	245.53	370.569	233.353	241.652	236.383	196.888	230.169	268.467	252.876	18.2141	51.5173	51	190.628	512.456	256.279	157.54	197.996	232.37	182.085	229.4	193.183	239.104	35.5918	106.776	51	163.757	147.503	206.444	107.079	113.12	191.225	165.025	131.045	153.15	12.5277	35.4337	51	126.681	174.219	162.602	137.992	199.35	173.831	112.451	176.632	219.189	164.772	11.4134	34.2401
52	251.11	354.516	226.704	220.865	219.441	207.165	228.167	240.957	243.616	16.5386	46.7783	52	177.92	523.395	253.107	159.307	195.934	222.722	181.002	226.043	228.035	240.829	36.6861	110.058	52	163.533	139.093	203.465	152.97	141.4	199.305	180.325	134.274	164.296	9.64209	27.272	52	108.127	163.651	162.005	146.633	188.797	161.67	139.044	167.067	190.957	158.661	8.45757	25.3727
53	246.327	329.793	236.678	226.061	237.19	208.787	215.845	278.025	247.338	13.9443	39.4405	53	196.277	413.63	267.697	153.335	207.425	241.611	188.364	227.162	225.048	235.616	24.7999	74.3997	53	170.576	142.974	199.89	91.7822	128.005	195.265	149.725	130.435	151.081	12.8572	36.3657	53	118.044	178.383	171.702	134.18	184.985	163.796	153.48	178.545	198.799	164.657	8.52863	25.5859
54	250.844	318.822	225.596	223.463	225.895	223.392	224.31	287.77	247.511	12.9305	36.5728	54	194.158	377.447	265.794	156.194	192.988	240.66	180.136	224.924	229.031	229.037	21.648	64.9441	54	167.781	141.68	198.996	118.552	114.609	173.059	177.047	139.844	153.946	10.5808	29.9269	54	117.724	167.814	170.508	143.583	186.451	168.474	160.319	148.575	203.897	163.038	8.31183	24.9355
55	253.767	305.029	216.731	228.66	221.054	220.146	225.165	276.151	243.338	11.4012	32.2476	55	205.455	449.813	258.182	155.942	199.47	228.158	188.797	229.4	230.027	238.36	28.1868	84.5603	55	163.086	145.562	198.996	152.97	80.375	195.265	196.718	125.077	157.256	14.5648	41.1955	55	127.96	178.062	173.044	142.313	206.093	172.301	146.642	161.965	197.623	167.334	8.51908	25.5572
56	253.502	268.319	237.786	233.857	233.962	244.487	220.162	279.187	246.408	6.92329	19.582	56	148.267	394.089	253.741	158.886	194.461	236.447	191.611	214.852	222.06	223.824	24.139	72.4171	56	169.122	142.974	195.124	103.255	154.796	199.305	159.56	124.767	156.113	11.5877	32.7749	56	119.003	174.54	176.624	139.517	187.038	166.773	131.446	162.603	213.307	163.428	9.80572	29.4171
57	256.69	257.389	253.3	220.865	226.702	200.674	222.163	266.594	238.047	8.2832	23.4284	57	185.686	422.699	256.278	153.335	195.934	231.012	196.808	207.371	233.014	231.349	25.936	77.8081	57	166.887	147.921	200.188	68.8366	141.4	184.492	156.282	142.638	151.081	13.8511	39.1768	57	117.084	179.343	169.911	123.253	184.399	167.198	128.407	163.241	209.778	160.291	10.4066	31.2198
58	243.67	288.416	245.543	220.865	229.929	245.028	222.163	283.384	247.375	9.10897	25.764	58	175.096	420.175	256.913	161.073	202.711	229.245	184.25	207.371	239.985	230.758	25.8471	77.5412	58	169.122	141.985	202.571	202.686	153.308	181.798	150.817	135.836	167.265	9.26592	26.208	58	118.364	166.533	173.641	133.926	169.155	166.773	150.441	170.893	188.604	159.814	7.26463	21.7939
59	245.53	278.544	238.894	207.872	231.542	208.787	223.164	288.744	240.385	10.5675	29.8894	59	179.332	385.674	255.644	155.353	185.916	225.168	185.116	177.925	216.086	218.468	23.1905	69.5714	59	169.681	147.427	200.486	179.74	87.817	195.265	180.325	137.26	162.25	13.1096	37.0796	59	123.162	166.854	172.597	139.517	179.415	158.268	104.853	167.067	209.386	157.902	10.4434	31.3303
60	255.362	277.486	231.137	239.053	223.474	216.901	222.163	280.349	243.241	8.85344	25.0413	60	151.091	392.406	250.569	156.783	181.202	245.823	196.808	183.52	218.078	219.587	24.5646	73.6938	60	153.014	145.943	198.996	202.686	75.9098	200.651	199.997	131.134	163.541	16.1718	45.7408	60	124.442	170.697	166.182	143.583	191.728	160.819	137.524	154.314	211.739	162.336	9.02093	27.0628
61	252.97	272.197	238.894	231.258	208.953	223.933	214.157	273.827	239.524	8.77796	24.8278	61	180.038	416.809	238.517	157.793	206.836	235.224	198.756	173.449	235.006	226.936	25.6469	76.9406	61	166.887	142.974	199.592	145.322	113.12	185.165	187.975	137.497	159.816	10.556	29.8568	61	118.364	168.135	176.774	130.623	183.226	174.427	139.044	163.879	205.073	162.171	9.23089	27.6927
62	253.502	265.498	253.3	210.471	217.02	221.769	215.845	280.349	239.719	9.4042	26.5991	62	194.159	426.907	244.226	160.232	190.336	239.029	196.158	189.115	238.989	231.017	26.2652	78.7955	62	167.446	147.921	210.316	152.97	123.539	210.078	147.539	127.148	160.87	11.8383	33.4838	62	115.484	165.572	176.923	133.926	182.933	170.174	139.804	153.038	193.31	159.018	8.47019	25.4106
63	262.802	276.076	231.137	213.069	212.987	233.669	220.078	285.708	241.941	10.2217	28.9113	63	216.046	442.053	253.741	153.839	199.47	241.339	203.953	180.163	218.077	234.298	27.8199	83.4596	63	166.775	141.985	209.125	141.498	98.2361	181.798	162.839	126.764	153.627	12.1036	34.234	63	120.923	173.579	170.359	131.385	180.588	168.048	132.206	164.516	187.82	158.825	8.06281	24.1884
64	256.159	266.203	234.461	213.069	236.383	208.787	219.8	281.511	239.547	9.27794	26.242	64	212.515	450.468	245.495	157.793	192.988	235.088	198.107	194.71	249.942	237.456	28.3631	85.0892	64	169.681	147.427	196.017	152.97	96.7477	203.345	187.975	139.576	161.717	12.4314	35.1614	64	117.404	172.618	175.729	136.213	164.757	153.591	160.319	158.777	190.173	158.842	7.21737	21.6521
65	260.41	262.325	224.256	233.857	208.953	233.669	219.496	282.673	240.705	8.90627	25.1907	65	175.096	442.894	250.569	158.213	190.631	238.078	204.386	173.449	219.073	228.043	28.7396	86.2187	65	153.014	140.995	203.465	175.916	119.074	175.065	139.889	125.834	154.156	10.1357	28.668	65	122.202	165.893	167.674	135.705	163.878	155.291	124.608	166.429	223.11	158.31	10.1385	30.4155
66	268.382	279.249	215.39	223.463	225.895	254.764	223.164	251.676	242.748	8.45309	23.909	66	142.618	414.284	260.085	156.279	184.738	232.778	207.85	166.734	220.069	220.604	27.3328	81.9983	66	173.258	148.911	190.655	126.201	111.632	175.738	180.325	126.537	154.157	10.5457	29.8278	66	119.963	174.54	169.911	130.114	153.617	163.796	145.882	163.879	212.523	159.358	8.99862	26.9959
67	267.585	270.082	234.229	220.865	216.214	248.273	223.164	276.151	244.57	8.58031	24.2688	67	212.515	415.126	239.151	159.727	210.666	239.708	204.819	168.972	230.027	231.19	24.8364	74.5093	67	166.775	144.458	194.826	152.97	153.308	189.878	161.746	138.362	162.79	7.19141	20.3404	67	122.842	174.86	173.044	129.098	159.187	165.497	132.966	173.443	205.465	159.6	8.92461	26.7738
68	259.613	264.793	217.607	205.274	226.702	253.141	223.164	281.511	241.476	9.49195	26.8473	68	184.98	425.224	258.816	159.979	196.523	237.262	183.601	182.401	194.178	224.774	27.0035	81.0105	68	153.014	138.446	191.847	168.267	104.19	179.105	179.232	132.729	155.854	10.3956	29.4031	68	118.364	168.775	170.061	143.583	164.757	134.03	120.049	170.893	221.149	156.851	10.6999	32.0997
69	266.256	265.851	239.77	218.266	221.054	269.368	207.381	282.673	246.327	10.0144	28.3251	69	193.453	427.748	248.032	161.325	194.461	233.865	209.365	195.829	236.002	233.342	25.8973	77.6919	69	155.149	139.093	180.825	156.795	108.655	178.432	178.139	114.989	151.509	10.0525	28.4328	69	116.444	162.69	170.21	140.534	152.444	154.016	166.397	166.429	219.189	160.928	9.17292	27.5188
70	263.599	254.568	207.633	207.872	209.759	254.223	228.542	285.708	238.988	10.5034	29.7082	70	187.098	435.321	237.882	163.176	198.586	251.531	199.839	181.282	163.309	224.225	28.2366	84.7099	70	152.131	142.974	189.166	130.025	151.819	177.758	181.418	131.664	157.119	8.10481	22.9239	70	110.686	153.723	164.094	142.821	157.428	155.291	99.5343	177.907	221.934	153.713	11.9424	35.8273
71	269.445	264.441	212.066	218.266	222.668	235.832	212.641	271.953	238.414	9.24294	26.143	71	146.854	421.858	238.517	157.456	201.237	238.893	210.448	187.996	209.115	223.597	26.9201	80.7604	71	157.161	147.921	193.932	175.916	133.958	180.452	187.975	142.738	165.007	7.94528	22.4727	71	117.724	168.135	171.552	128.59	148.633	160.819	146.642	167.705	204.681	157.164	8.55148	25.6545
72	268.648	268.754	250.851	223.463	207.339	250.978	222.163	282.673	246.859	9.43849	26.6961	72	172.978	442.894	257.547	163.26	194.166	253.161	188.364	195.829	251.934	235.57	28.5561	85.6682	72	153.014	141.985	183.506	248.577	93.7709	174.392	183.604	121.694	162.568	16.5491	46.8079	72	118.683	162.05	171.254	131.639	142.184	120.848	151.201	160.69	205.857	151.601	9.15787	27.4736
73	268.382	251.789	233.121	213.069	212.18	254.223	211.613	285.708	241.261	9.97831	28.2229	73	176.508	454.675	235.979	162.25	192.398	252.89	206.984	177.925	254.921	234.948	29.7084	89.1251	73	154.355	147.427	179.037	137.673	135.447	183.145	207.647	135.475	160.026	9.5067	26.889	73	112.925	170.697	170.359	137.23	156.256	129.778	142.083	165.792	185.467	152.287	7.77409	23.3223
74	259.613	246.894	242.218	220.865	217.827	269.368	210.585	265.882	241.657	8.09604	22.899	74	208.279	475.712	238.517	164.185	180.024	254.52	203.087	185.758	219.503	236.62	31.3463	94.0389	74	167.446	140.995	189.464	160.619	107.167	172.843	194.533	122.906	156.996	10.9689	31.0247	74	122.202	163.651	163.944	138.755	145.115	151.464	142.083	154.314	197.623	153.239	7.03242	21.0972
75	274.228	276.864	216.731	223.463	229.929	252.6	219.161	256.324	243.663	8.65929	24.4922	75	198.395	455.517	253.107	163.26	186.8	255.879	200.055	190.234	225.477	236.525	29.2252	87.6756	75	161.398	142.974	189.761	168.267	90.7938	153.384	240.434	127.535	159.318	15.5833	44.0762	75	120.603	153.403	172.895	137.992	148.926	137.007	125.1	155.589	236.442	154.217	11.5935	34.7804
76	279.011	270.828	193.693	213.069	212.987	255.305	207.381	262.846	236.89	11.8129	33.4118	76	186.392	437.004	238.517	163.26	190.041	249.085	209.365	187.996	207.553	229.913	27.3694	82.1082	76	163.075	146.932	184.995	133.849	62.5139	176.849	181.418	123.299	146.616	14.4228	40.7939	76	113.245	151.161	169.762	134.943	136.907	131.904	120.542	159.415	226.639	149.391	11.3621	34.0864
77	271.837	291.59	195.033	179.29	234.769	261.796	217.159	252.576	238.006	13.7147	38.7911	77	148.267	461.407	243.591	160.568	194.461	251.531	209.582	198.067	230.456	233.103	30.8022	92.4065	77	164.528	136.543	175.164	195.037	141.4	174.56	196.718	137.536	165.186	8.68491	24.5646	77	114.525	165.572	169.911	142.058	133.096	148.488	121.301	173.443	215.268	153.74	10.3788	31.1363
78	271.039	297.936	215.445	196.261	207.339	252.6	207.381	243.731	236.467	12.7052	35.9359	78	179.332	429.431	253.741	165.615	195.05	248.541	170.827	184.639	231.452	228.736	27.427	82.2809	78	159.945	140.995	180.229	183.564	111.632	173.415	196.718	125.89	159.049	10.6483	30.1179	78	118.044	162.37	168.27	140.788	134.268	169.324	117.502	168.98	218.797	155.371	10.6089	31.8266
79	276.62	293	215.145	193.662	213.793	231.505	198.916	275.439	237.26	13.7306	38.836	79	212.515	426.907	244.86	159.979	194.461	239.029	168.228	203.662	227.469	230.79	26.3672	79.1015	79	167.211	138.522	177.846	149.146	117.586	149.95	159.56	122.769	147.824	7.37972	20.873	79	114.205	171.657	171.105	141.042	160.067	149.457	125.86	153.038	216.444	155.875	9.91195	29.7359
80	285.654	290.885	193.765	198.859	212.987	251.518	203.148	281.961	239.847	14.9312	42.2319	80	178.626	431.114	242.957	163.764	202.711	249.357	172.559	200.305	211.536	228.103	27.1954	81.5861	80	164.304	140.501	189.761	179.74	92.2824	170.554	156.282	106.989	150.052	12.25	34.6481	80	110.046	155.965	172.298	141.296	140.132	167.741	133.458	152.401	221.934	155.03	10.4371	31.3112
81	283.263	295.468	215.858	204.056	231.542	253.682	215.158	286.158	248.148	12.8858	36.4467	81	194.865	447.943	253.107	162.166	190.336	248.405	175.373	182.401	223.486	230.898	29.1228	87.3685	81	163.075	132.09	184.995	103.255	117.586	169.981	150.817	108.965	141.346	10.7211	30.3238	81	121.882	171.978	171.105	141.55	137.493	153.284	125.86	158.14	207.426	154.302	8.92698	26.7809
82	285.123	304.988	191.736	191.064	216.214	235.832	207.381	255.162	235.938	15.0764	42.6425	82	167.329	448.785	275.943	160.148	198.291	245.959	177.538	174.568	242.406	232.33	30.2707	90.8121	82	161.062	132.585	175.164	145.322	102.701	153.956	180.325	109.127	145.03	10.1121	28.6013	82	116.444	158.847	169.613	135.959	143.943	151.158	128.14	157.502	196.447	150.895	7.91302	23.7391
83	279.277	297.584	207.185	191.064	218.634	254.223	220.078	282.673	243.84	14.0718	39.801	83	176.508	460.565	268.331	166.372	202.416	229.245	182.085	184.639	255.351	236.168	30.4947	91.4842	83	166.54	132.585	180.229	99.4307	101.213	164.258	199.997	119.749	145.5	13.2855	37.5769	83	117.724	164.612	163.944	135.705	142.184	155.835	138.777	159.415	208.21	154.045	8.50238	25.5071
84	286.451	294.763	206.105	178.072	227.508	250.978	203.148	281.961	241.123	15.5414	43.9576	84	186.392	464.773	233.442	162.923	194.755	214.977	181.002	195.829	215.52	227.735	30.4437	91.331	84	160.392	139.511	177.846	152.97	126.516	153.384	187.975	115.942	151.817	8.59903	24.3217	84	109.406	161.729	166.63	145.87	128.405	151.158	140.296	159.415	205.465	152.042	8.95075	26.8523
85	280.871	279.602	206.553	209.253	222.668	252.6	219.161	265.17	241.985	11.0181	31.1639	85	206.161	487.492	260.085	166.877	197.407	203.698	188.364	194.71	255.351	240.016	32.5391	97.6173	85	167.993	140.501	176.952	110.903	119.074	163.686	147.539	112.83	142.435	9.20253	26.0287	85	112.925	155.324	165.138	144.854	136.614	163.489	144.096	147.937	195.662	151.782	7.56019	22.6806
86	268.382	277.839	219.128	201.458	229.122	254.223	215.845	290.356	244.544	11.521	32.5864	86	179.332	485.81	246.129	130.288	198.291	215.928	180.136	191.353	222.49	227.751	34.0348	102.105	86	167.993	139.511	181.122	152.97	104.19	164.83	162.839	122.982	149.555	9.08587	25.6987	86	117.084	163.651	168.271	149.936	148.34	154.985	121.301	158.777	221.934	156.031	10.1235	30.3706
87	273.431	279.602	206.685	180.67	233.156	275.318	218.7	265.17	241.591	13.1455	37.181	87	167.329	468.98	254.375	141.054	200.943	241.067	188.797	207.371	243.401	234.813	31.7744	95.3233	87	165.348	146.932	168.313	172.092	105.678	154.528	187.975	119.237	152.513	9.81189	27.7522	87	112.925	158.847	166.331	140.28	138.959	169.442	171.448	140.923	228.599	158.639	10.7771	32.3312
88	281.137	275.018	208.346	183.269	245.257	254.223	219.161	286.158	244.071	13.2295	37.4187	88	189.216	442.894	265.794	160.568	189.157	236.447	191.611	207.371	233.444	235.167	28.0268	84.0805	88	163.336	142.48	176.952	137.673	78.8866	156.818	139.889	123.552	139.948	10.5304	29.7844	88	110.046	162.37	164.094	143.837	129.871	144.354	125.86	157.502	196.447	148.265	8.49197	25.4759
89	284.857	267.966	218.048	183.269	236.383	235.832	228.542	256.774	238.959	11.1236	31.4622	89	186.392	431.955	257.547	166.288	207.425	238.757	196.808	177.925	245.393	234.277	26.8685	80.6055	89	161.398	137.038	170.696	202.686	96.7477	144.227	180.325	136.748	153.733	11.4603	32.4146	89	110.366	163.01	169.315	142.567	136.907	158.386	154.733	155.589	223.502	157.153	10.142	30.426
90	280.074	254.215	196.351	204.056	219.441	250.978	219.05	248.379	234.068	10.1559	28.7253	90	147.561	428.589	244.86	162.671	210.371	231.012	184.25	183.52	201.865	221.633	27.8362	83.5085	90	161.436	122.844	168.015	175.916	101.213	157.962	161.746	126.985	147.015	9.35827	26.4692	90	111.006	157.566	164.094	146.125	132.509	150.732	119.022	143.473	199.191	147.08	8.69481	26.0844
91	290.172	277.134	215.754	193.662	231.542	254.223	220.162	231.588	239.28	11.4682	32.4371	91	176.508	438.687	235.345	158.129	208.014	227.343	185.116	173.449	169.004	219.066	28.8563	86.5689	91	163.783	104.6	178.441	172.092	142.889	153.384	179.232	135.611	153.754	9.02274	25.5202	91	112.605	149.88	165.585	149.428	123.715	143.078	148.654	142.836	198.407	148.243	8.12152	24.3646
92	279.011	272.903	212.116	191.064	225.088	269.368	217.71	227.39	236.831	11.5241	32.5951	92	189.216	446.26	248.666	159.727	208.309	234.952	196.808	189.115	167.012	226.674	29.0724	87.2173	92	167.808	113.114	173.675	164.443	113.12	153.956	178.139	135.027	149.91	9.29527	26.291	92	119.323	160.448	169.315	152.224	125.474	134.999	131.179	154.314	192.918	148.91	7.8695	23.6085
93	276.885	245.401	202.415	175.473	229.929	252.6	214.157	244.181	230.13	11.2855	31.9201	93	152.503	441.212	254.375	151.4	218.621	233.593	198.756	180.163	194.894	225.058	29.3454	88.0363	93	161.398	116.763	190.655	149.146	110.144	145.944	181.418	132.028	148.437	10.1627	28.7445	93	113.245	153.082	165.436	150.699	133.096	150.307	123.581	142.836	219.973	150.251	10.2266	30.6798
94	279.011	260.915	213.329	188.466	230.735	255.305	224.31	248.379	237.556	10.2775	29.0692	94	176.508	470.663	249.935	150.223	203.005	239.98	196.158	194.71	177.966	228.794	31.9408	95.8224	94	165.348	96.1728	194.826	160.619	75.9098	150.522	187.975	124.932	144.538	14.986	42.3869	94	114.205	155.965	163.646	141.55	131.337	167.742	134.978	164.516	209.778	153.746	9.22036	27.6611
95	284.591	241.875	243.514	178.072	233.156	261.796	237.007	235.785	239.474	10.6785	30.2035	95	157.445	447.102	251.204	146.942	217.443	236.719	203.953	173.449	208.835	227.01	29.859	89.5771	95	161.398	132.531	191.847	137.673	108.655	155.101	183.604	126.728	149.692	10.1275	28.6448	95	114.205	149.239	163.944	143.837	130.164	173.269	122.061	147.937	220.757	151.713	10.6811	32.0434
96	275.291	261.972	248.365	188.466	234.769	252.6	215.845	256.774	241.76	9.89244	27.98	96	186.392	450.468	265.794	149.466	211.844	237.806	198.107	166.734	179.957	227.397	30.3059	90.9177	96	164.454	124.321	180.825	152.97	102.701	152.812	159.56	123.902	145.193	9.12223	25.8016	96	115.164	156.926	167.226	147.395	133.975	151.158	169.929	144.749	213.699	155.58	9.14789	27.4437
97	283.529	295.246	232.6	193.662	219.441	231.505	223.164	235.785	239.366	11.9086	33.6826	97	184.98	485.81	242.957	145.428	201.237	226.935	204.386	168.972	205.848	229.617	33.4549	100.365	97	165.684	116.111	189.166	130.025	90.7938	148.233	156.282	123.907	140.025	10.9872	31.0764	97	109.726	150.52	164.839	149.682	115.799	148.181	141.056	145.386	234.089	151.031	11.8897	35.669
98	276.354	310.694	205.921	183.269	235.576	251.518	217.593	244.181	240.638	14.2476	40.2983	98	204.749	416.809	250.569	142.989	205.657	236.039	207.85	182.401	171.991	224.339	26.35	79.05	98	170.938	106.728	193.932	152.97	107.167	147.088	150.817	108.328	142.246	11.4557	32.4017	98	107.807	154.043	158.574	143.583	125.474	158.812	167.649	119.242	223.11	150.922	11.2949	33.8848
99	282.2	278.858	218.048	191.064	235.576	253.682	217.159	260.972	242.195	11.4152	32.2871	99	205.455	439.529	251.204	145.933	203.3	227.071	204.819	195.829	186.928	228.896	27.9854	83.9561	99	168.143	109.074	183.506	99.4307	113.12	159.679	180.325	137.455	143.842	11.8859	33.6184	99	116.444	161.729	149.602	146.125	126.06	150.732	120.542	151.125	212.131	148.277	9.54158	28.6247
100	276.885	285.015	228.962	193.662	240.417	235.832	207.381	231.588	237.468	10.9845	31.0688	100	222.4	456.358	243.591	143.494	210.077	203.154	183.601	181.282	218.793	229.194	29.9832	89.9497	100	161.398	119.63	180.825	175.916	95.2593	155.673	199.997	117.428	150.766	12.8583	36.3686	100	108.127	153.083	142.356	152.732	131.044	140.527	121.301	158.777	191.349	144.366	7.99531	23.9859
101	270.508	287.395	195.007	183.269	233.156	254.223	224.31	252.576	237.555	12.6953	35.9077	101	157.445	489.175	244.86	143.914	180.024	191.74	209.365	187.996	208.835	223.706	34.6231	103.869	101	170.155	117.284	189.166	156.795	99.7245	160.252	187.975	114.071	149.428	12.2619	34.6818	101	114.845	159.488	147.045	143.583	114.92	143.929	156.252	171.53	208.21	151.089	9.51874	28.5562
102	251.907	262.311	199.857	149.489	250.098	251.518	203.148	256.774	228.138	14.1368	39.9849	102	216.752	446.26	254.376	144.251	186.8	231.419	199.839	195.829	215.806	232.37	28.6229	85.8688	102	167.993	107.901	193.932	114.728	95.2593	135.069	147.539	101.285	132.963	12.3541	34.9426	102	114.205	164.291	147.471	147.141	121.956	149.882	141.816	116.054	214.876	146.41	10.2732	30.8196
103	267.319	266.545	191.369	175.473	242.837	235.832	218.543	244.181	230.262	11.7446	33.2187	103	209.691	451.309	242.323	145.176	190.041	231.012	210.448	177.925	204.852	229.197	29.3579	88.0736	103	167.137	110.247	183.506	133.849	93.7709	153.956	162.839	103.207	138.564	11.7587	33.2587	103	108.446	159.488	148.324	141.296	135.441	124.794	129.659	148.575	217.62	145.96	10.2632	30.7897
104	264.662	245.9	206.237	191.064	239.61	255.305	200.065	248.379	231.403	9.89753	27.9944	104	163.093	474.029	247.398	146.017	194.461	232.099	188.364	185.758	187.924	224.349	32.8768	98.6305	104	172.167	110.247	179.037	84.1337	98.2361	161.396	187.975	117.511	138.838	14.3698	40.644	104	113.565	156.605	151.165	142.058	125.767	144.779	147.894	149.85	234.089	151.753	11.241	33.7229
105	268.914	251.027	198.961	196.261	246.871	255.305	214.817	231.588	232.968	9.58581	27.1128	105	179.332	458.041	238.517	141.475	195.05	229.245	206.984	190.234	190.911	225.532	30.5415	91.6246	105	171.385	92.6543	189.464	114.728	89.3054	161.969	139.889	118.528	134.74	13.096	37.041	105	107.167	157.886	149.318	141.55	111.695	142.228	128.14	131.358	214.091	142.604	10.4995	31.4984
106	265.194	279.522	220.789	193.662	239.61	226.096	214.105	260.972	237.494	10.3221	29.1952	106	168.036	440.37	260.719	139.204	194.461	240.252	203.087	187.996	186.928	224.561	29.5166	88.5498	106	167.993	114.938	189.761	198.861	93.7709	153.384	180.325	116.109	151.893	13.8449	39.1594	106	115.164	149.88	149.176	135.959	116.092	147.756	122.061	128.169	206.249	141.168	9.3431	28.0293
107	260.145	267.849	212.3	198.859	268.653	222.31	219.05	260.972	238.767	10.0372	28.3896	107	181.45	495.907	239.151	140.886	202.711	239.98	200.055	198.067	175.974	230.465	34.7144	104.143	107	171.944	111.42	167.548	95.6064	89.3054	143.082	161.746	112.426	131.635	11.8169	33.4231	107	110.686	147.638	151.023	127.065	122.835	148.606	133.458	162.603	191.349	143.918	8.01686	24.0506
108	270.508	265.103	212.3	204.056	258.165	233.669	217.159	189.61	231.321	10.7309	30.3515	108	214.634	481.602	237.248	140.129	190.336	239.573	209.365	184.639	188.919	231.827	32.8031	98.4092	108	156.741	98.5185	170.1	126.201	81.8634	144.227	179.232	123.713	135.074	12.0308	34.0283	108	107.807	143.795	149.744	143.329	115.213	140.102	141.816	141.56	209.778	143.683	9.51894	28.5568
109	276.62	291.538	196.535	191.064	267.04	221.769	222.086	269.367	242.002	13.6904	38.7222	109	180.744	443.736	252.472	139.372	198.291	232.778	209.582	203.662	188.919	227.729	29.0097	87.0291	109	163.895	102.037	181.888	156.795	108.655	163.686	178.139	136.103	148.9	10.7142	30.3043	109	107.167	147.958	148.75	139.009	119.903	148.181	132.698	114.141	210.17	140.886	10.0888	30.2665
110	268.116	294.284	200.173	191.064	263.006	196.888	215.158	265.17	236.732	14.1871	40.1273	110	176.508	477.395	215.68	143.746	202.416	225.304	170.827	200.305	193.898	222.898	32.8562	98.5685	110	163.039	126.667	169.802	152.97	108.655	156.818	181.418	134.261	149.204	8.55761	24.2046	110	115.484	155.645	148.181	138.501	113.747	134.999	134.978	143.473	219.973	144.998	10.4332	31.2997
111	275.557	300.464	198.961	178.072	259.779	207.165	210.154	239.983	233.767	14.9336	42.2387	111	151.091	490.858	250.569	141.054	194.755	217.423	168.228	182.401	195.89	221.363	35.4695	106.408	111	163.151	104.383	178.909	164.443	126.516	167.12	187.975	149.493	155.249	9.7877	27.6838	111	108.127	160.769	146.05	146.125	100.848	137.976	121.301	120.518	218.013	139.969	11.7103	35.131
112	276.088	288.105	190.472	188.466	240.417	200.674	215.695	269.367	233.66	14.2701	40.3619	112	183.568	460.565	247.398	138.783	197.407	227.071	172.559	174.568	205.848	223.085	31.5206	94.5619	112	166.951	121.975	164.142	221.807	133.958	152.239	183.604	132.596	159.659	11.4775	32.4633	112	103.968	142.194	151.023	132.91	114.333	141.803	125.86	135.822	229.776	141.965	12.0065	36.0195
113	278.214	293.941	225.956	178.072	254.132	223.392	213.899	269.367	242.122	13.6182	38.518	113	192.041	440.37	218.217	139.372	198.291	203.154	175.373	184.639	203.856	217.257	28.8768	86.6304	113	174.723	107.901	182.781	168.267	125.028	140.793	139.889	128.325	145.963	9.39405	26.5704	113	112.605	151.481	152.302	138.501	92.3461	154.559	124.341	159.415	192.918	142.052	9.79176	29.3753
114	282.466	279.865	208.978	188.466	264.62	220.146	210.411	242.569	237.19	12.557	35.5165	114	175.802	484.968	241.054	141.223	200.943	191.74	177.538	195.829	210.827	224.436	33.8023	101.407	114	166.786	113.765	151.163	156.795	133.958	147.661	180.325	135.921	148.297	7.31885	20.7008	114	111.646	158.847	153.154	131.893	109.643	143.078	126.62	157.502	221.934	146.035	11.3036	33.9109
115	272.368	296.687	213.829	193.662	264.62	223.392	212.95	261.234	242.343	12.7573	36.083	115	202.631	504.322	237.248	143.157	189.157	231.419	182.085	194.71	197.881	231.401	35.3202	105.961	115	158.849	123.712	163.248	164.443	108.655	147.661	161.746	114.731	142.881	8.28593	23.4362	115	98.5297	148.599	159.121	148.158	102.9	155.835	144.096	117.967	222.326	144.17	12.347	37.041
116	277.948	298.061	194.426	183.269	262.199	200.674	207.152	231.138	231.858	15.1027	42.7168	116	193.453	467.297	235.345	141.391	207.425	231.012	181.002	191.353	233.73	231.334	31.1646	93.4938	116	159.855	120.011	152.185	126.201	110.144	158.535	179.232	134.59	142.594	8.3262	23.55	116	101.729	145.076	153.58	145.616	90.5872	163.914	127.38	114.141	214.876	139.656	12.4461	37.3383
117	274.494	290.508	217.467	191.064	270.267	245.028	205.151	255.162	243.643	12.6229	35.703	117	165.917	451.309	228.367	140.297	210.371	232.099	188.364	185.758	213.814	224.033	30.0822	90.2467	117	155.049	119.107	165.248	156.795	87.817	149.95	178.139	127.215	142.415	10.3303	29.2184	117	106.847	148.919	151.591	131.639	108.47	137.125	157.012	105.214	199.975	138.533	10.1807	30.542
118	270.242	289.821	195.639	193.662	267.04	208.787	206.396	239.083	233.834	13.3918	37.8778	118	182.862	481.602	242.323	142.484	208.014	229.245	180.136	190.234	195.89	228.088	33.1283	99.3848	118	154.713	113.064	143.546	152.97	117.586	148.233	181.418	126.812	142.293	7.9511	22.4891	118	97.8898	142.514	160.542	143.583	92.053	151.158	142.576	126.894	205.465	140.297	11.2429	33.7288
119	272.9	288.448	200.49	175.473	263.006	216.901	190.452	244.181	231.481	14.7049	41.5918	119	165.917	517.785	244.226	143.073	208.309	240.252	188.797	187.996	211.823	234.242	37.0607	111.182	119	154.713	114.705	163.248	164.443	117.586	145.944	139.889	128.458	141.123	6.88574	19.4758	119	99.4893	153.083	159.405	127.573	93.2256	167.316	131.939	102.663	223.11	139.756	13.7654	41.2962
120	272.368	289.821	217.467	191.064	259.779	220.146	203.148	238.821	236.577	12.3081	34.8125	120	193.453	460.565	247.398	143.157	202.416	231.012	209.365	194.71	188.919	230.111	30.3821	91.1462	120	159.855	113.765	143.546	126.201	110.144	147.661	147.539	114.731	132.93	6.72294	19.0153	120	98.5297	148.919	151.023	143.583	102.9	163.914	157.012	128.169	192.918	142.996	9.88182	29.6455
