# Supplementary material for: LTP and memory impairment caused by extracellular Aβ and Tau oligomers is APP-dependent
Source: eLife. 2017 Jul 11;6:e26991. doi: 10.7554/eLife.26991 (PMC5529106; doi:10.7554/eLife.26991)
Supplement: Figure 5—source data 7. — DOI: http://dx.doi.org/10.7554/eLife.26991.023 [file elife-26991-fig5-data7.xlsx]

## Sheet: Fig 5G
Figure 5G
	WT VEHICLE														APP KO VEHICLE													WT Amy																APP KO Amy
	Slice 1	Slice 2	Slice 3	Slice 4	Slice 5	Slice 6	Slice 7	Slice 8	Slice 9	Slice 10	Slice 11	AVG	ERROR	STDEV		Slice 1	Slice 2	Slice 3	Slice 4	Slice 5	Slice 6	Slice 7	Slice 8	Slice 9	AVG	ERROR	STDEV		Slice 1	Slice 2	Slice 3	Slice 4	Slice 5	Slice 6	Slice 7	Slice 8	Slice 9	Slice 10	Slice 11	Slice 12	AVG	ERROR	STDEV		Slice 1	Slice 2	Slice 3	Slice 4	Slice 5
Baseline 1	102.042	105.463	95.1426	100.179	93.5302	98.4263	118.169	97.4889	101.177	95.3552	110.891	101.624	2.23797	7.42249	Baseline 1	101.935	113.789	100.136	82.6416	99.2629	83.5419	90.2457	83.9355	96.5558	94.6715	3.48839	10.4652	Baseline 1	92.1591	93.5153	89.2114	117.774	96.3438	108.365	85.6414	105.526	102.461	95.1652	107.952	86.2964	98.3675	2.89246	10.0198	Baseline 1	92.1132	87.7974	105.041	100.956	96.4746
2	101.989	99.5175	107.105	100.601	107.657	92.5656	101.679	97.5188	103.742	97.6899	118.812	102.625	2.07872	6.89434	2	104.571	118.189	103.086	95.1435	95.3329	86.8655	89.1814	84.2615	104.633	97.9183	3.58695	10.7608	2	100.936	93.0646	115.191	124.282	95.4305	96.3674	91.6621	100.448	76.7842	92.6235	113.944	86.7722	98.9589	3.81679	13.2218	2	98.4347	101.399	93.7868	100.956	100.86
3	104.591	104.429	97.666	117.345	94.9916	105.194	92.707	97.2976	116.024	100.24	95.0494	102.321	2.48925	8.2559	3	101.056	106.245	96.0897	92.0166	91.5765	97.5347	99.2386	92.384	99.0992	97.2489	1.61353	4.8406	3	102.914	95.7687	71.075	105.377	97.3483	102.56	90.1293	110.85	100.428	98.5135	72.0055	100.721	95.6408	3.56675	12.3556	3	102.047	99.1261	93.7868	96.7641	96.4746
4	100.884	105.463	96.3762	95.8173	95.8035	98.6409	92.707	100.489	92.6724	91.7205	126.732	99.7551	2.97007	9.8506	4	82.6027	50.922	103.086	94.9716	102.239	91.5893	108.089	97.9986	92.7162	91.5793	5.65954	16.9786	4	104.336	90.8112	87.7409	96.5952	93.2388	98.6895	99.9392	96.3287	104.327	100.072	101.112	93.7908	97.2484	1.49161	5.1671	4	109.874	100.34	105.979	97.4628	100.86
5	104.036	99.5175	99.2751	94.551	99.5382	105.174	118.169	95.3132	104.776	103.849	87.1286	101.03	2.36915	7.85759	5	115.995	76.6974	101.715	87.4331	83.9947	101.698	99.4378	104.092	98.0248	96.5654	3.96787	11.9036	5	100.874	100.501	92.6426	95.4588	92.417	106.043	98.4067	103.581	108.14	97.3025	83.1726	100.601	98.2617	1.95778	6.78196	5	97.5316	112.478	105.041	104.449	101.225
6	91.711	101.844	107.105	100.601	94.9916	98.4263	101.679	94.9486	95.7857	107.851	63.3662	96.2099	3.62097	12.0094	6	96.6627	113.789	96.9777	104.347	94.552	104.164	96.1286	100.176	127.706	103.834	3.58758	10.7627	6	102.706	93.966	97.5444	96.182	96.3438	101.399	87.7012	103.551	108.14	97.1143	79.3142	86.4806	95.8701	2.34217	8.1135	6	102.047	99.1261	105.041	100.657	96.4746
7	100.884	104.429	109.748	100.179	107.657	92.5656	92.707	105.666	100.287	110.97	63.3662	98.9508	4.00566	13.2853	7	104.571	118.189	103.086	112.649	98.1918	99.6915	95.0705	107.002	104.986	104.826	2.39552	7.18657	7	99.2545	77.9669	105.387	122.01	95.4305	107.978	85.9355	98.9761	110.086	98.8704	108.719	100.275	100.907	3.31669	11.4893	7	94.2203	114.501	93.7868	92.5722	100.86
8	97.0433	93.8308	101.286	100.601	113.178	105.194	92.707	98.9712	96.3	96.2506	95.0494	99.1283	1.77763	5.89572	8	92.2689	106.245	100.136	110.353	107.41	103.395	101.455	108.657	94.3522	102.697	2.09467	6.28401	8	98.0209	93.5153	122.053	126.865	97.3483	109.526	85.6414	100.13	106.169	105.644	92.4839	98.0997	102.958	3.46303	11.9963	8	92.1132	99.1261	105.979	103.751	90.6277
9	104.988	101.844	102.366	117.345	92.7183	98.6409	90.9455	101.154	96.6293	104.87	110.891	102.036	2.29824	7.6224	9	101.056	50.922	103.086	121.03	113.441	100.434	110.718	103.967	102.515	100.797	6.63912	19.9174	9	92.5299	93.0646	121.073	117.774	93.2388	98.3024	91.6621	97.2622	88.7043	105.456	111.577	100.53	100.931	3.10271	10.7481	9	98.4347	90.2249	107.855	94.6681	104.149
10	102.964	90.4705	97.4642	95.8173	107.657	105.174	90.9455	98.9712	93.6416	88.6573	87.1286	96.2628	2.07383	6.87813	10	95.7839	76.6974	96.0897	91.3434	96.6546	107.559	111.413	113.181	86.5457	97.2519	3.97279	11.9184	10	92.1591	95.7687	86.7606	124.282	92.417	108.365	90.1293	94.717	88.7043	101.317	106.981	95.4136	98.0845	3.07997	10.6693	10	98.4347	101.554	105.041	99.5587	101.225
11	93.1113	93.8308	95.1426	93.9955	105.709	98.4263	91.2084	98.9712	112.564	88.5313	87.1286	96.238	2.25218	7.46963	11	101.935	62.8667	103.086	87.0321	98.8291	105.915	99.2386	95.0765	97.5407	94.6133	4.35632	13.069	11	100.936	90.8112	89.2114	105.377	101.64	96.3674	99.9392	95.9475	95.8423	101.423	105.109	102.769	98.7811	1.50296	5.20641	11	109.874	114.501	88.1596	103.751	99.0327
12	102.964	94.0893	96.6058	95.6012	94.9916	92.5656	105.022	112.199	92.7057	96.1238	110.891	99.4326	2.15803	7.15738	12	101.935	140.193	101.715	104.151	103.053	100.77	108.089	97.9986	93.8241	105.748	4.5024	13.5072	12	102.914	100.501	115.191	96.5952	102.919	102.56	98.4067	103.581	101.762	103.821	101.52	112.49	103.522	1.52928	5.29758	12	97.5316	90.2249	98.0028	96.7641	104.149
13	104.004	104.429	95.4905	96.6616	95.8035	105.194	104.771	110.938	99.9166	98.1475	150.495	105.986	4.6837	15.5341	13	101.056	137.049	97.0543	103.678	105.502	111.934	99.4378	104.092	94.3522	106.017	4.2357	12.7071	13	104.336	96.67	71.075	95.4588	107.942	98.6895	97.4869	95.0576	110.782	98.3716	115.059	106.291	99.7682	3.21842	11.1489	13	99.0367	99.1261	93.7868	103.751	105.245
14	93.3512	96.4157	97.4642	90.6114	99.5382	98.6409	104.771	94.9486	90.9782	95.3398	101.895	96.7231	1.31617	4.36525	14	82.6027	103.73	97.0543	98.586	109.722	98.6043	96.1286	100.176	102.515	98.7909	2.44921	7.34764	14	100.874	100.951	87.7409	74.0736	105.841	106.043	99.9392	99.2674	96.9576	103.126	104.031	111.569	99.2011	2.82945	9.80149	14	102.047	100.34	85.346	104.449	103.418
15	95.4391	104.429	101.777	100.179	96.2907	105.174	101.814	95.3132	102.8	101.499	91.1759	99.6264	1.3342	4.42503	15	115.995	124.476	97.6026	114.627	100.245	106.303	96.1286	107.002	104.633	107.446	3.1201	9.36029	15	98.2165	104.557	92.6426	89.1569	105.75	105.656	106.684	103.581	100.712	101.181	97.0202	117.901	101.921	2.14107	7.41687	15	106.863	90.2249	113.482	99.5587	99.0327
Drugs 1	100.884	101.844	96.3762	90.6114	94.5045	108.252	90.9455	100.489	102.8	110.97	95.0494	99.3387	1.98599	6.58679	Drugs 1	92.2689	96.4648	100.111	97.8476	107.562	108.832	95.0705	108.657	96.5558	100.374	2.11458	6.34374	Drugs 1	103.779	99.8247	71.5652	96.6986	107.942	112.622	104.538	91.6226	84.6823	97.9634	107.952	116.538	99.644	3.61072	12.5079	Drugs 1	97.8326	100.744	88.6241	98.1614	104.514
2	104.988	99.5175	99.1721	88.923	97.7521	100.371	90.9455	98.9712	95.7857	96.2506	88.2871	96.4513	1.5586	5.1693	2	95.7839	96.4648	97.5942	86.473	88.479	103.157	101.455	108.657	104.633	98.0774	2.43528	7.30583	2	104.274	100.951	95.0935	101.141	102.736	92.8842	105.458	95.6179	58.9393	99.6858	113.944	110.453	98.4315	3.99992	13.8561	2	95.4244	114.501	107.855	100.657	102.322
3	104.988	93.8308	103.32	92.2998	94.9916	98.9226	91.2084	110.938	101.177	104.87	95.0494	99.2359	1.906	6.3215	3	101.056	127.492	93.6793	101.824	102.251	108.832	113.428	103.967	99.0992	105.737	3.29971	9.89913	3	102.706	102.979	105.387	105.48	103.467	95.9803	106.684	95.314	49.1512	105.427	112.412	108.404	99.4493	4.77221	16.5314	3	105.057	84.5607	109.73	101.305	100.86
4	97.0433	101.844	104.984	95.8173	101.974	105.663	105.022	100.489	116.024	88.6573	102.97	101.863	2.07146	6.87024	4	117.753	110.568	92.8404	97.4385	93.5599	83.5419	113.428	83.9355	92.7162	98.4201	4.19321	12.5796	4	99.2545	96.8954	106.858	116.224	104.015	97.9154	108.523	92.864	70.0801	107.4	107.923	119.111	102.255	3.67364	12.7259	4	105.96	112.478	97.5382	100.956	95.7438
5	102.964	104.429	89.6782	88.923	98.8887	105.06	104.771	112.199	101.177	88.5313	95.0494	99.2427	2.34939	7.79204	5	92.2689	106.619	98.9143	113.387	107.933	86.8655	84.0237	84.2615	98.0248	96.9219	3.61515	10.8454	5	98.0209	93.7406	116.661	99.6946	98.4442	97.5284	109.136	95.8267	76.9561	110.681	109.309	119.255	102.104	3.34798	11.5977	5	110.175	106.004	88.1595	100.657	97.9364
6	97.0433	93.8308	99.2751	95.8173	106.845	107.125	118.169	95.3132	99.9166	96.1238	91.1838	100.058	2.34952	7.79249	6	101.056	127.492	105.145	99.1787	98.4862	97.5347	84.2279	92.384	96.5558	100.229	3.9274	11.7822	6	92.5299	99.3741	97.0542	84.198	100.636	88.6269	106.684	110.85	74.2277	103.517	127.263	121.616	100.548	4.34345	15.0461	6	103.552	103.981	89.0974	108.641	103.052
7	100.884	99.5175	97.2699	86.6718	101	104.691	101.679	100.489	103.742	98.1475	87.1286	98.2926	1.81711	6.02667	7	95.7839	141.595	102.136	105.711	99.2723	91.5893	91.3627	97.9986	104.633	103.342	5.07699	15.231	7	92.1591	104.557	98.0345	92.9794	97.8962	93.8062	106.684	95.8267	96.9576	107.087	113.877	116.001	101.322	2.34746	8.13185	7	106.562	101.554	95.6625	106.895	97.9364
8	97.0433	99.5175	103.806	92.3514	101.812	109.392	92.707	94.9486	93.6416	95.3398	101.895	98.405	1.62347	5.38445	8	101.935	90.8236	105.144	79.2034	98.4862	101.698	90.2457	104.092	99.0992	96.7476	2.81264	8.43792	8	100.936	100.501	118.622	100.418	94.1521	105.474	95.0342	90.4591	98.0585	103.795	126.076	118.125	104.304	3.1769	11.0051	8	97.8326	119.356	121.923	103.401	101.225
9	95.4391	104.429	96.3762	95.8173	96.6154	109.426	92.707	110.938	99.9166	101.499	110.891	101.278	2.01602	6.68638	9	104.571	106.619	98.0086	103.971	102.221	104.164	89.1814	100.176	92.7162	100.181	1.95983	5.87948	9	102.914	110.641	81.8588	87.8139	95.5219	98.9399	113.735	110.85	74.2277	108.515	114.709	123.312	101.92	4.24545	14.7067	9	102.348	116.524	107.855	104.449	95.7438
10	93.3512	104.429	100.059	94.6917	94.9916	109.178	118.169	100.489	100.287	103.849	101.895	101.945	2.15016	7.13126	10	101.056	108.876	105.145	109.5	103.037	99.6915	99.2386	107.002	98.0248	103.508	1.43709	4.31127	10	104.336	93.5153	95.5837	79.9623	100.545	97.0731	97.4869	91.6226	100.712	108.621	137.254	118.461	102.098	4.19047	14.5162	10	103.251	84.156	81.5945	97.4628	104.149
11	102.042	93.8308	108.564	89.9079	108.307	112.759	101.679	110.938	102.8	107.851	101.895	103.689	2.12151	7.03624	11	82.6027	101.542	103.746	112.565	100.017	103.395	108.089	108.657	127.706	105.369	3.97398	11.9219	11	100.874	102.754	99.0148	95.0456	98.2615	92.406	99.9392	90.4591	98.0585	107.704	134.974	116.521	103.001	3.52137	12.1984	11	97.8326	107.623	115.358	104.449	105.245
12	104.988	104.429	91.765	100.601	97.1026	106.951	92.707	112.199	101.177	104.87	95.0494	101.076	1.9265	6.38947	12	115.995	103.798	98.9924	110.419	110.697	100.434	99.4378	103.967	104.986	105.414	1.94208	5.82623	12	98.2165	112.669	116.171	122.32	113.695	99.4066	106.684	95.314	96.9576	109.663	130.836	124.705	110.553	3.37695	11.6981	12	103.251	99.9353	102.228	99.5587	103.418
13	102.964	93.8308	96.3762	92.7219	100.837	106.542	92.707	94.9486	100.287	95.3398	110.891	98.8587	1.81215	6.01023	13	92.2689	82.3618	98.9924	110.419	97.8848	107.559	96.1286	113.181	94.3522	99.2386	3.24348	9.73045	13	103.779	111.092	103.426	70.2511	101.732	94.7396	104.538	88.2849	100.712	111.979	135.353	119.534	103.785	4.62701	16.0284	13	89.705	100.34	92.8489	98.1614	99.0327
14	97.0433	99.5175	103.806	96.2394	101.974	118.568	90.9455	97.2976	104.776	88.6573	87.1286	98.723	2.6539	8.80198	14	95.7839	103.798	99.5517	96.3922	93.304	105.915	95.0705	95.0765	102.515	98.6008	1.50225	4.50676	14	104.274	109.514	95.0935	101.141	99.7227	92.4061	105.458	103.581	91.4167	112.293	125.265	124.488	105.388	3.19679	11.074	14	103.251	104.79	115.358	97.4628	104.514
15	100.884	90.4705	104.984	101.164	94.9916	117.87	90.9455	95.3132	101.177	96.2506	102.97	99.7291	2.3152	7.67866	15	101.056	85.1824	100.111	100.791	90.7422	100.77	101.455	104.458	86.5457	96.7902	2.40918	7.22754	15	100.874	97.5713	92.2818	105.48	97.1657	101.273	106.684	103.581	87.979	109.989	140.21	127.453	105.879	4.23149	14.6583	15	93.0163	94.6755	93.7867	100.657	102.322
16	104.988	105.463	96.6058	100.601	101	113.505	91.2084	94.9486	95.7857	95.3398	95.0494	99.4995	1.94008	6.43453	16	117.753	94.2083	97.5942	107.451	102.036	111.934	110.718	109.805	97.5407	105.449	2.6521	7.9563	16	98.2165	103.655	101.956	116.224	90.7732	97.5399	108.523	95.0576	89.3521	116.446	140.977	124.183	106.909	4.39259	15.2164	16	105.659	114.501	95.6625	100.956	100.86
17	102.042	104.429	95.4905	92.3514	95.3164	111.056	105.022	112.199	103.742	98.1475	110.891	102.79	2.06983	6.86486	17	96.6627	90.8236	93.6793	123.624	95.9371	98.6043	111.413	107.16	93.8241	101.303	3.56727	10.7018	17	103.779	111.993	116.661	99.6946	94.426	98.4732	109.136	91.2124	98.0585	106.662	132.547	129.365	107.667	3.78815	13.1225	17	98.4347	84.5607	100.352	103.751	95.7438
18	97.0433	90.4705	109.748	86.5311	92.3936	116.716	104.771	95.3132	104.776	96.2506	101.895	99.6281	2.69167	8.92725	18	101.205	101.542	92.8404	108.273	95.7525	106.303	109.283	115.8	102.649	103.739	2.35213	7.0564	18	104.274	102.979	95.5837	84.198	100.545	97.5398	106.684	96.3287	101.711	108.52	136.813	121.42	104.716	3.87638	13.4282	18	105.358	112.478	94.7246	108.641	97.9364
19	104.988	104.429	96.3762	94.6917	101.162	125.898	104.771	97.2976	99.9166	101.499	110.891	103.811	2.60952	8.65481	19	92.2689	80.1053	93.6793	105.711	95.7223	108.832	114.247	115.052	105.36	101.22	3.85377	11.5613	19	102.706	96.8954	99.0148	92.9794	98.2615	109.207	106.684	91.5911	100.712	106.672	141.304	125.789	105.985	4.13478	14.3233	19	103.552	106.004	107.855	106.895	103.052
20	102.042	93.8308	101.264	89.9079	94.9916	124.483	101.814	95.3132	100.287	98.1475	102.97	100.459	2.70599	8.97476	20	101.056	115.645	92.8404	108.679	100.833	103.157	107.429	114.819	96.4389	104.544	2.59474	7.78421	20	100.874	93.7406	116.171	100.418	113.695	101.273	95.0342	98.9761	101.711	115.757	131.274	118.806	107.311	3.32352	11.513	20	96.9296	103.981	97.5382	103.401	97.9364
Tetanus															Tetanus													Tetanus																Tetanus
1	293.341	256.841	299.612	177.283	486.274	273.179	225.609	243.453	314.465	326.462	323.054	292.688	23.735	78.72	1	438.143	462.58	172.258	256.023	239.722	165.873	225.595	265.61	263.653	276.606	35.0606	105.182	1	164.522	145.073	160.286	248.875	159.264	188.546	141.852	200.331	291.044	169.536	142.782	185.617	183.144	13.1143	45.4291	1	305.539	290.905	291.091	192.83	199.527
2	293.111	246.713	286.463	187.554	380.753	259.02	314.262	230.835	302.692	310.235	315.133	284.252	15.5256	51.4925	2	308.581	440.015	165.547	271.709	235.128	225.486	216.334	239.917	270.728	263.716	25.8023	77.407	2	182.138	150.742	149.503	233.688	170.405	213.281	145.384	188.415	281.57	192.246	166.572	198.367	189.359	11.3734	39.3986	2	214.931	160.625	226.964	192.099	181.621
3	286.679	227.755	291.661	200.792	328.317	245.204	315.117	218.522	296.805	323.224	386.42	283.681	16.8061	55.7395	3	254.249	410.117	165.547	268.603	244.507	216.337	206.843	228.843	237.428	248.053	22.5866	67.7599	3	191.106	143.405	136.758	279.233	186.112	210.947	158.799	189.536	260.984	194.624	154.422	209.359	192.941	12.6114	43.6871	3	210.716	164.266	201.642	189.908	170.292
4	286.196	247.752	282.73	212.37	340.915	250.1	216.04	222.886	261.484	320.212	283.45	265.83	12.5699	41.6897	4	243.8	451.297	162.286	288.878	252.587	211.025	215.037	216.042	207.958	249.879	27.7472	83.2415	4	190.999	159.747	151.463	277.561	180.268	229.615	153.588	197.643	253.013	194.624	155.956	197.058	195.128	11.6781	40.4541	4	198.073	150.914	214.772	197.212	179.428
5	274.216	254.764	279.074	212.664	323.026	252.032	159.219	224.607	332.126	313.829	323.054	268.055	16.4154	54.4436	5	211.758	429.861	155.948	239.302	223.686	213.128	225.595	219.361	244.244	240.32	25.152	75.4559	5	179.362	164.082	145.091	273.33	190.405	230.549	146.23	189.96	241.385	209.392	145.264	211.216	193.855	11.869	41.1154	5	182.42	148.891	227.902	195.386	161.156
6	257.506	241.26	272.294	218.819	342.377	257.357	166.858	229.353	313.823	312.435	243.846	259.63	14.9295	49.5155	6	237.531	451.862	153.469	248.327	224.167	218.008	206.889	211.283	229.127	242.296	27.6824	83.0471	6	183.419	133.734	146.562	270.28	186.021	213.281	124.158	194.917	233.043	200.843	118.14	210.094	184.541	13.3821	46.3568	6	164.359	141.204	254.162	193.56	181.986
7	237.276	257.361	277.741	223.216	351.727	249.06	131.872	221.959	202.615	288.362	229.928	242.829	16.6097	55.0882	7	234.048	449.605	149.336	248.034	242.246	219.369	223.479	206.441	236.949	245.501	27.3407	82.0222	7	183.206	146.407	146.071	277.266	192.048	233.815	163.091	195.656	229.101	201.808	142.782	215.59	193.903	11.8518	41.0559	7	175.798	162.243	273.857	193.56	172.485
8	243.167	259.958	265.321	229.225	353.351	255.787	181.943	227.954	208.502	281.077	204.242	246.412	13.9104	46.1356	8	218.723	445.656	150.162	266.826	212.838	238.613	214.882	203.712	239.67	243.454	27.416	82.2479	8	176.266	158.079	141.66	273.92	181.729	205.813	155.427	185.404	235.565	201.808	145.264	207.176	189.009	11.2216	38.8728	8	173.992	141.204	268.23	200.864	161.522
9	251.225	248.531	271.765	221.311	323.026	258.946	236.258	230.769	237.936	277.811	196.321	250.355	10.0322	33.2731	9	232.655	341.858	150.713	286.066	238.39	225.84	216.245	214.611	225.455	236.87	17.5034	52.5102	9	169.326	160.747	135.778	272.74	192.322	211.414	142.858	183.259	205.846	201.808	166.572	221.597	188.689	10.9121	37.8008	9	171.282	150.51	297.304	194.656	147.27
10	236.86	247.752	276.145	225.854	296.341	263.695	265.562	235.001	237.936	279.777	180.48	249.582	9.58689	31.7961	10	236.138	388.68	149.336	283.995	245.622	227.775	220.195	223.494	235.295	245.614	21.3634	64.0901	10	175.625	150.409	134.797	275.888	186.752	212.347	157.156	190.171	227.312	202.252	154.422	215.869	190.25	11.4361	39.6157	10	173.089	150.105	286.987	197.212	157.502
11	236.793	265.152	261.481	225.121	216.923	266.82	292.871	237.787	237.936	276.246	229.928	249.733	7.23331	23.9902	11	250.766	387.552	146.029	289.914	242.006	228.164	224.13	216.905	225.685	245.683	21.7475	65.2426	11	169.433	152.076	136.758	262.113	185.838	218.414	155.096	186.44	224.294	202.252	162.053	218.531	189.442	10.6135	36.7664	11	174.895	160.22	287.925	193.56	151.655
12	234.038	265.411	261.381	210.172	280.266	266.27	276.901	237.296	226.162	282.452	223.252	251.237	7.7424	25.6786	12	238.227	396.578	150.713	261.649	238.39	231.612	225.493	210.424	229.218	242.478	21.788	65.364	12	166.444	162.748	132.347	267.131	177.346	203.947	154.802	189.814	227.883	199.912	155.956	220.652	188.248	10.9265	37.8507	12	177.303	163.861	286.987	195.386	162.618
13	234.483	251.388	258.855	212.077	296.341	256.881	309.095	228.928	208.502	275.726	204.242	248.774	10.5965	35.1447	13	231.958	385.859	146.305	260.907	223.926	228.748	222.922	211.296	242.215	239.348	21.1007	63.302	13	176.586	155.411	134.797	271.952	178.898	223.081	155.685	188.73	229.396	201.007	169.94	223.3	192.399	11.2317	38.9079	13	179.109	165.48	269.168	191.734	160.791
14	244.082	253.985	258.85	205.042	215.367	258.269	305.448	230.166	190.841	276.083	223.252	241.944	10.0308	33.2684	14	248.676	396.578	146.305	269.638	220.07	228.783	227.212	218.074	233.71	243.227	22.1617	66.4851	14	165.483	148.074	131.366	250.602	167.026	205.813	155.096	182.095	214.456	193.636	175.824	213.353	183.569	9.68805	33.5604	14	173.089	164.671	295.428	195.751	151.29
15	247.096	269.826	250.717	202.697	287.248	264.828	301.833	236.011	208.579	270.34	229.928	251.737	9.35577	31.0296	15	273.753	387.552	144.376	258.094	209.222	223.285	227.569	197.819	209.074	236.749	22.4857	67.4572	15	148.721	163.749	128.425	264.967	170.679	210.014	153.036	185.022	216.748	198.026	168.235	218.741	185.53	10.9439	37.9106	15	175.798	156.174	283.236	192.83	145.443
16	238.056	256.582	265.198	200.499	288.547	257.927	272.295	229.861	137.859	283.008	223.252	241.189	13.089	43.4112	16	213.847	394.885	151.264	253.211	216.694	232.964	221.218	209.443	216.185	234.413	22.0124	66.0372	16	145.198	169.752	133.327	265.951	173.327	212.347	155.096	189.548	221.289	198.175	159.154	208.383	185.962	10.8478	37.5778	16	167.971	167.098	280.422	193.925	143.25
17	233.033	266.71	256.101	195.369	351.538	266.257	262.913	237.285	261.484	277.953	191.569	254.565	12.9999	43.1158	17	209.668	399.398	143.274	257.059	227.783	237.075	219.281	223.529	230.056	238.569	22.6426	67.9279	17	144.557	141.738	126.955	263.786	173.145	214.681	156.273	186.125	216.033	195.271	163.034	208.383	182.498	11.3333	39.2596	17	168.874	157.792	302.931	191.369	144.347
18	235.688	285.668	257.559	188.481	347.478	259.704	175.137	231.445	249.71	263.497	191.569	244.176	14.7977	49.0786	18	209.668	410.681	152.918	273.486	223.686	233.707	232.092	219.047	230.202	242.832	23.4485	70.3454	18	156.481	166.083	134.307	255.521	175.337	207.214	164.219	187.491	219.718	197.003	175.619	217.045	188.003	9.57233	33.1595	18	166.767	160.625	262.603	193.56	149.463
19	234.038	256.841	247.488	190.626	358.777	260.556	143.479	232.204	214.389	258.329	223.252	238.18	15.9421	52.8739	19	243.103	436.63	150.713	303.529	253.094	242.564	219.514	218.014	226.359	254.836	26.3437	79.0311	19	152.958	167.751	137.248	252.176	172.14	238.482	165.691	187.955	209.854	187.334	167.169	219.832	188.216	10.1335	35.1033	19	170.379	161.434	284.174	191.734	137.769
20	238.056	291.901	257.086	195.774	301.862	262.025	164.715	233.513	243.823	267.755	261.272	247.071	11.9297	39.5662	20	252.855	412.937	149.336	269.638	220.07	225.062	217.717	219.571	225.503	243.632	23.8038	71.4113	20	152.27	152.41	131.856	257.587	178.898	227.282	169.222	182.156	229.195	181.89	165.634	219.832	187.353	10.9383	37.8913	20	167.67	155.77	301.993	188.082	152.386
21	234.038	252.167	254.383	212.881	241.375	268.953	211.276	239.687	214.389	269.676	223.252	238.371	6.45202	21.3989	21	248.676	407.86	152.091	275.557	231.399	231.258	217.562	199.21	208.054	241.296	23.7369	71.2107	21	153.044	179.09	121.563	246.863	166.935	209.08	173.343	181.229	206.578	183.849	174.204	205.674	183.454	9.10626	31.545	21	175.196	160.625	275.733	187.717	149.097
22	239.06	284.889	254.076	218.233	225.042	266.277	235.833	237.302	214.389	274.578	197.905	240.69	8.11563	26.9165	22	250.069	437.759	148.509	266.826	212.838	233.088	210.467	214.81	221.242	243.956	26.5632	79.6895	22	153.989	145.406	167.149	254.144	167.392	226.349	170.4	182.529	220.928	184.207	151.949	203.886	185.694	9.77111	33.8481	22	172.788	163.861	273.857	198.308	152.752
23	228.011	250.769	260.064	216.035	215.042	262.394	278.411	233.842	249.71	265.89	223.252	243.947	6.56991	21.7899	23	238.924	436.066	149.887	256.023	231.399	240.796	211.861	227.848	217.326	245.57	25.8385	77.5155	23	154.075	176.755	136.758	233.378	168.67	212.814	171.283	180.538	210.223	183.309	175.756	214.382	184.828	8.03776	27.8436	23	167.068	156.579	279.484	192.464	143.616
24	233.033	255.963	247.913	211.491	241.375	264.728	262.28	235.922	237.936	248.583	186.986	238.747	6.8598	22.7514	24	240.317	434.374	149.611	256.023	231.399	220.173	200.18	222.354	225.848	242.253	26.0146	78.0439	24	154.676	146.407	153.424	231.105	169.127	237.082	170.105	178.333	223.379	180.053	164.654	215.923	185.356	9.38593	32.5138	24	169.476	167.098	279.485	196.847	158.964
25	229.016	267.13	253.402	199.913	218.1	265.466	277.631	236.579	208.502	268.641	147.212	233.781	11.7534	38.9817	25	259.125	454.118	145.754	265.79	223.926	226.175	209.538	201.945	217.885	244.917	28.5912	85.7736	25	150.981	163.415	136.268	214.266	170.77	231.015	167.162	178.957	206.373	170.637	182.543	206.843	181.603	8.04195	27.8581	25	169.777	167.098	297.304	201.96	151.29
26	240.238	232.331	268.042	180.273	203.486	279.148	283.404	248.773	202.615	278.606	186.986	236.718	11.6069	38.4959	26	259.821	430.989	148.509	273.78	215.093	226.564	216.199	213.726	222.668	245.261	25.9514	77.8543	26	124.858	159.08	148.032	220.361	166.296	230.082	165.397	176.551	217.613	174.237	169.812	215.172	180.624	9.46867	32.8004	26	170.981	168.312	289.801	195.021	151.655
27	228.011	271.026	248.657	195.938	310.468	263.004	281.362	234.386	190.841	258.605	191.569	243.079	11.8184	39.1971	27	233.351	446.785	145.478	266.826	229.797	222.092	199.414	221.38	214.953	242.231	27.7537	83.2611	27	137.576	166.75	135.778	220.361	161.547	217.948	167.996	180.611	213.303	179.823	163.844	206.329	179.322	8.50261	29.4539	27	170.981	162.243	269.168	201.229	148.001
28	231.653	250.51	242.981	195.205	304.947	271.287	290.587	241.767	208.502	261.969	223.252	247.515	10.0404	33.3001	28	232.655	429.861	144.376	265.79	240.886	230.993	205.537	212.261	212.622	241.665	26.0005	78.0014	28	135.17	148.074	136.268	242.056	162.734	225.882	171.368	182.283	207.781	180.58	170.537	205.278	180.668	9.83604	34.073	28	162.553	135.944	269.168	203.786	146.905
29	238.229	295.178	251.178	172.212	303.486	269.208	300.009	239.914	202.615	267.852	185.232	247.738	13.7401	45.5707	29	229.172	420.271	141.621	278.37	233.173	232.178	207.307	210.179	218.146	241.157	25.3577	76.0731	29	131.561	182.758	143.621	228.523	160.816	214.74	178.419	180.087	205.727	180.708	176.208	203.259	182.202	8.15047	28.2341	29	172.787	165.075	287.925	197.212	149.097
30	233.718	262.716	245.532	206.473	305.11	267.715	290.623	238.584	208.502	256.233	204.242	247.222	10.1098	33.5303	30	218.723	446.22	146.305	244.479	215.093	229.278	219.963	218.332	224.095	240.277	27.2939	81.8817	30	132.334	165.416	137.739	224.494	152.415	187.205	184.244	174.576	207.601	179.276	168.619	201.029	176.246	7.91798	27.4287	30	175.497	170.335	277.609	204.516	134.48
31	238.229	288.426	240.344	171.04	342.837	284.386	282.356	253.441	179.067	250.433	186.986	247.05	15.8715	52.6398	31	232.655	454.682	147.407	291.035	236.788	230.525	216.4	214.975	209.565	248.226	28.6068	85.8203	31	138.178	148.741	112.74	224.907	151.319	204.939	175.66	183.968	201.178	170.84	179.192	202.585	174.521	9.30495	32.2333	31	161.048	163.457	289.801	203.055	142.154
32	233.388	289.205	251.338	175.436	299.264	287.881	271.17	256.555	190.841	268.099	191.569	246.795	13.0927	43.4236	32	238.924	434.374	147.958	254.246	215.093	238.798	192.525	214.602	203.31	237.759	26.6871	80.0614	32	132.162	162.081	153.914	209.823	146.662	204.472	175.354	179.205	247.5	167.68	182.006	201.556	180.201	9.16526	31.7494	32	157.736	164.671	262.603	193.925	149.463
33	233.463	248.692	239.607	210.465	299.751	293.253	241.968	261.343	161.407	254.656	191.569	239.652	12.2816	40.7335	33	252.159	457.503	144.927	266.826	237.27	227.572	208.996	203.151	211.159	245.507	28.9285	86.7854	33	127.264	159.08	124.994	214.989	150.497	215.673	181.178	186.597	209.649	172.938	169.813	199.783	176.038	9.08389	31.4675	33	162.553	171.144	265.417	199.769	152.386
34	235.499	285.05	241.313	224.828	307.708	298.243	211.786	265.79	190.841	265.535	178.896	245.953	12.8388	42.5816	34	254.249	437.194	150.438	278.663	230.038	231.736	198.902	210.365	211.696	244.809	26.8568	80.5704	34	124.686	157.746	139.699	196.393	146.57	202.606	183.324	188.457	219.4	179.026	164.014	199.768	175.141	8.29166	28.7231	34	164.359	161.838	264.479	198.673	159.695
35	235.605	260.119	252.013	221.457	302.025	293.266	265.543	261.355	161.407	269.13	166.222	244.377	13.8048	45.7853	35	268.18	460.323	144.101	261.942	244.742	238.736	201.824	209.603	215.967	249.491	29.1517	87.455	35	123.311	174.087	148.522	197.116	145.748	202.139	188.229	189.32	211.134	169.831	174.588	198.227	176.854	7.62064	26.3987	35	166.165	165.884	271.044	201.595	148.732
36	244.082	269.727	245.967	215.741	312.255	291.1	272.754	259.424	179.067	261.559	166.222	247.082	13.442	44.582	36	259.125	489.658	150.989	259.13	215.093	239.223	211.676	216.503	214.85	250.694	31.746	95.2381	36	118.671	154.411	138.229	210.34	146.114	192.864	181.791	182.38	213.369	166.68	170.154	188.799	171.983	8.30214	28.7595	36	161.65	166.694	297.304	200.499	158.233
37	240.194	274.142	248.73	206.068	308.195	287.123	289.916	255.88	167.293	254.677	186.986	247.2	13.3995	44.441	37	266.787	435.309	145.203	278.663	222.565	222.56	195.083	217.219	216.495	244.431	27.0967	81.2902	37	115.148	173.754	151.953	192.467	143.648	225.533	182.711	192.745	226.737	167.053	175.014	190.51	178.106	9.20951	31.9027	37	156.833	161.434	274.795	200.134	149.463
38	237.225	280.115	254.15	199.913	216.666	295.614	290.264	263.447	255.597	253.752	191.569	248.937	10.4608	34.6945	38	245.193	437.565	146.58	235.006	204.486	232.434	184.346	213.087	222.334	235.67	27.1556	81.4667	38	106.813	158.413	158.326	201.042	146.844	212.465	174.74	177.024	194.588	168.758	167.994	195.784	171.899	8.19727	28.3962	38	162.854	164.266	277.609	206.707	121.69
39	235.601	272.906	244.58	182.325	297.965	289.162	258.814	257.697	202.615	249.899	140.876	239.313	14.2093	47.127	39	237.531	424.22	146.305	218.285	204.245	234.255	190.064	212.884	218.468	231.806	25.7102	77.1306	39	107.156	151.743	142.15	203.728	154.333	223.666	173.821	185.028	212.446	165.267	169.756	199.187	174.023	9.55193	33.0888	39	168.874	154.151	265.416	205.612	136.672
40	234.038	276.084	250.745	198.447	301.05	293.186	246.004	261.283	208.502	248.478	172.559	244.58	11.9111	39.5047	40	285.594	387.547	145.203	279.405	237.029	230.029	192.238	220.94	214.819	243.645	22.869	68.6071	40	104.149	169.752	128.425	174.801	153.511	234.564	164.219	183.822	214.98	165.071	181.281	208.724	173.608	10.3977	36.0188	40	162.252	157.388	255.1	203.421	145.443
41	236.047	278.421	245.678	195.516	300.563	304.507	233.203	271.373	243.746	257.211	197.905	251.288	10.8891	36.1151	41	261.911	401.458	145.478	239.89	204.486	242.767	190.25	212.016	223.597	235.761	23.6049	70.8146	41	105.61	154.077	119.112	180.277	152.689	218.697	157.156	175.522	212.698	164.538	164.1	189.412	166.157	9.55397	33.0959	41	175.497	155.609	269.168	210.36	144.712
42	233.519	251.932	243.173	203.137	306.247	299.33	272.997	266.758	220.275	251.409	159.886	246.242	12.7121	42.1612	42	228.475	414.433	143.55	237.819	211.718	232.867	187.732	226.847	218.398	233.538	24.6401	73.9203	42	102.946	164.416	129.896	188.232	151.593	207.205	160.982	185.452	212.583	164.97	158.06	201.633	168.997	9.32617	32.3068	42	166.466	159.358	243.846	202.325	150.193
43	237.767	263.099	254.721	215.888	217.64	295.714	290.317	263.537	249.71	256.381	191.569	248.758	9.48243	31.4497	43	250.766	442.639	142.999	268.897	237.51	244.686	187.135	234.437	218.862	247.548	27.4395	82.3185	43	98.7351	165.416	132.347	171.185	153.785	214.794	164.514	185.694	190.846	169.334	175.298	196.944	168.241	8.79766	30.476	43	168.874	156.93	248.535	209.994	152.386
44	233.106	243.621	246.155	222.044	287.898	285.368	299.295	254.316	226.162	258.022	191.569	249.778	9.6787	32.1006	44	223.787	433.049	139.692	265.049	211.477	218.262	192.024	235.369	208.026	236.304	27.0618	81.1853	44	102.602	163.082	145.091	175.214	154.424	221.693	169.517	182.604	208.122	164.443	170.282	182.14	169.934	8.67921	30.0657	44	185.129	144.281	259.789	208.899	161.887
45	232.884	278.421	237.861	212.88	352.187	286.007	291.684	254.885	202.615	257.025	159.886	251.485	15.5262	51.4947	45	240.504	441.511	143.55	265.049	211.477	239.391	170.688	225.415	217.05	239.404	28.1097	84.3291	45	96.7586	170.752	146.562	169.016	161.73	210.65	177.168	185.549	225.924	162.775	159.964	201.765	172.384	9.59418	33.2352	45	173.39	161.381	236.343	197.212	153.848
46	235.703	232.714	243.722	209.926	336.923	301.577	294.601	268.761	184.954	252.523	159.886	247.39	15.6637	51.9505	46	241.898	421.203	149.135	271.709	222.325	220.49	185.174	230.265	229.57	241.308	25.2727	75.818	46	97.9617	156.745	152.934	164.264	153.511	218.697	179.817	184.295	203.43	166.929	158.543	193.188	169.193	8.88542	30.78	46	170.078	158.548	250.411	203.786	154.944
47	231.085	224.663	228.92	189.8	332.702	301.382	257.181	268.588	161.407	256.017	235.925	244.333	14.3574	47.6181	47	213.338	403.715	155.472	245.809	193.398	232.84	192.998	230.989	224.993	232.617	23.2559	69.7676	47	98.3054	179.09	127.935	175.008	153.693	202.139	186.292	187.415	187.813	162.069	158.941	189.52	167.352	8.56534	29.6712	47	172.788	157.793	263.541	201.229	148.366
48	233.519	278.421	241.867	195.662	343.743	310.189	241.417	276.436	237.936	247.004	191.569	254.342	13.6989	45.434	48	198.014	390.176	153.268	238.854	200.629	237.34	193.145	231.562	222.122	229.457	22.0424	66.1271	48	102.911	158.746	166.659	165.813	150.771	212.488	183.937	192.063	174.827	164.633	161.755	191.857	168.872	7.83093	27.1271	48	169.175	157.281	275.733	204.151	150.559
49	230.904	261.8	236.194	180.566	358.128	301.434	269.449	268.634	179.067	245.327	172.559	245.824	16.9053	56.0684	49	221	402.022	153.819	251.434	207.861	233.839	177.131	219.069	223.245	232.158	23.3806	70.1418	49	102.568	177.089	151.954	171.289	153.602	253.882	170.988	189.902	198.628	161.992	173.394	183.289	174.048	10.1137	35.035	49	176.099	155.312	245.721	205.612	144.712
50	228.239	263.099	228.087	193.61	310.468	289.669	268.834	258.149	155.52	245.031	147.212	235.265	15.6915	52.0428	50	271.85	433.613	151.89	253.505	208.102	224.673	174.393	234.996	228.769	242.421	26.9004	80.7011	50	102.654	154.077	135.288	158.891	151.41	217.317	174.52	192.814	189.756	153.255	166.53	186.244	165.23	8.66739	30.0247	50	178.808	146.708	261.665	205.612	149.828
51	231.024	264.397	237.032	194.636	358.128	300.624	275.71	267.912	267.37	253.884	178.896	257.238	14.7196	48.8194	51	246.774	435.87	152.165	267.861	233.654	230.427	180.6	237.988	237.533	246.986	26.3874	79.1621	51	99.732	177.089	145.581	163.54	158.716	229.045	184.526	174.94	200.585	159.719	153.384	195.309	170.181	9.30636	32.2382	51	185.129	149.892	259.789	199.768	150.193
52	229.016	258.424	228.732	219.845	301.538	298.659	283.872	266.161	234.954	248.443	147.212	246.987	13.1424	43.5883	52	204.979	432.485	148.584	267.861	218.709	234.29	186.177	236.684	217.469	238.582	26.691	80.073	52	102.396	147.741	141.17	157.962	148.671	191.101	175.991	188.371	197.722	162.113	156.965	192.121	163.527	7.93086	27.4733	52	175.798	152.724	242.908	204.151	149.463
53	216.648	251.153	233.626	223.509	306.247	311.959	260.536	278.013	249.067	243.105	147.212	247.371	13.658	45.2985	53	214.035	425.151	152.165	259.215	218.95	234.387	171.149	236.133	216.47	236.406	26.0093	78.0279	53	100.677	170.752	143.13	166.95	148.214	252.502	175.108	194.167	200.48	167.503	169.898	193.27	173.554	10.5723	36.6234	53	164.961	164.266	219.461	204.881	147.27
54	225.144	276.442	231.457	219.259	298.939	318.72	260.564	284.038	214.389	237.065	223.252	253.57	10.873	36.0615	54	229.359	430.228	149.135	258.388	208.102	238.71	174.9	233.03	214.41	237.362	26.5604	79.6812	54	103.083	147.407	155.385	155.792	148.762	247.673	163.631	185.155	190.565	166.159	167.525	186.042	168.098	9.8534	34.1332	54	174.895	144.685	267.292	201.595	125.709
55	226.002	261.38	231.239	212.664	344.325	318.733	241.247	284.05	237.936	244.214	204.242	255.094	13.2447	43.9276	55	250.953	456.178	154.094	251.434	207.861	232.363	191.573	224.216	212.588	242.362	28.5653	85.6958	55	101.966	184.426	150.973	161.268	147.94	215.939	172.595	193.016	185.018	160.404	156.638	184.557	167.895	8.28625	28.7044	55	187.237	148.678	266.354	205.247	135.942
56	220.98	249.174	240.719	227.027	332.187	306.546	213.104	273.19	202.615	246.55	153.549	242.331	14.8389	49.2149	56	229.359	438.126	148.584	262.236	219.19	222.161	165.245	225.066	203.792	234.862	27.8524	83.5573	56	100.935	165.083	151.953	148.044	146.022	206.97	173.514	191.55	192.683	166.929	160.717	196.083	166.707	8.3397	28.8896	56	172.788	149.998	240.094	211.82	131.922
57	222.989	259.302	251.156	224.096	283.513	306.117	256.735	272.807	149.633	255.294	185.232	242.443	13.4822	44.7153	57	225.876	451.101	151.614	261.201	222.806	241.804	167.144	230.025	220.24	241.312	28.6516	85.9549	57	106.143	155.411	146.071	155.586	138.078	249.744	163.704	188.08	203.679	162.069	146.548	189.065	167.015	10.5957	36.7044	57	173.39	144.227	243.846	210.36	137.038
58	222.989	253.589	237.238	227.32	226.179	313.186	274.212	279.107	202.615	241.053	166.222	240.337	11.9583	39.6613	58	202.38	453.922	147.482	273.038	208.102	232.814	186.791	233.72	223.794	240.227	29.1144	87.3433	58	103.736	175.088	157.836	149.387	149.31	252.504	152.975	193.365	190.115	164.633	161.556	197.639	170.679	10.4169	36.0851	58	170.981	151.968	227.902	206.342	127.171
59	223.993	250.732	246.365	231.277	210.171	314.964	304.708	280.691	239.633	246.865	172.559	247.451	12.3675	41.0185	59	221	432.485	156.023	235.748	211.477	238.772	189.602	221.934	217.351	236.044	25.9634	77.8903	59	103.135	167.751	145.091	142.775	147.575	228.357	160.393	189.788	176.24	161.992	152.162	204.706	164.997	9.35634	32.4113	59	170.078	149.487	240.094	212.916	132.287
60	222.989	259.302	240.728	221.311	307.546	322.04	307.318	286.997	214.389	244.664	210.579	257.987	12.4424	41.2668	60	229.359	453.922	149.135	268.897	215.093	236.995	180.668	237.546	220.756	243.597	28.7172	86.1516	60	102.19	160.747	151.463	144.325	144.287	203.523	164.011	183.386	200.48	153.255	166.061	204.15	164.823	8.59716	29.7814	60	171.884	143.013	245.721	209.629	132.287
61	214.953	258.004	239.943	215.272	295.042	317.392	317.405	282.855	220.275	244.122	210.579	255.986	12.3843	41.0741	61	216.124	414.997	149.686	265.049	211.477	232.754	166.611	226.836	210.43	232.663	25.4933	76.4798	61	98.8383	169.752	135.778	140.812	150.041	209.042	161.252	186.476	190.565	159.719	141.62	202.461	162.196	9.13485	31.6441	61	176.4	145.792	268.23	218.759	116.939
62	216.648	268.911	229.062	211.755	292.931	319.545	309.827	284.774	220.275	240.267	191.569	253.233	13.1828	43.7226	62	271.154	410.484	147.757	269.932	211.477	227.989	167.144	218.663	226.966	239.063	25.3649	76.0947	62	94.7996	184.759	144.111	142.568	152.141	206.283	165.237	180.278	185.018	162.113	144.027	191.926	162.772	8.64953	29.9628	62	165.563	149.083	231.653	222.046	120.228
63	220.896	234.631	233.591	212.318	300.888	311.51	329.168	277.613	149.633	237.525	178.896	244.242	16.8134	55.7638	63	268.367	390.74	146.104	247.586	211.718	237.287	186.791	219.478	218.571	236.293	22.6067	67.82	63	97.7212	156.412	140.189	143.781	142.552	218.7	162.171	176.357	192.683	162.113	145.568	198.405	161.388	9.25328	32.0543	63	185.43	151.403	217.585	213.529	131.191
64	220.617	248.395	226.594	216.117	289.359	312.475	320.094	278.474	273.257	241.152	191.569	256.191	12.5589	41.6531	64	213.338	462.383	149.41	271.709	229.797	232.098	189.602	221.088	222.113	243.504	29.4983	88.4949	64	97.2916	156.412	161.757	150.523	146.844	235.258	163.398	178.797	203.679	159.719	147.847	196.455	166.498	9.96876	34.5328	64	163.757	153.075	211.958	214.99	119.862
65	220.312	239.046	238.313	214.991	295.042	312.59	342.017	278.576	214.389	244.539	216.915	256.066	13.3421	44.2508	65	252.346	440.383	151.89	247.586	211.718	223.423	180.668	225.636	231.068	240.524	27.1327	81.398	65	101.898	186.76	126.955	156.563	149.675	243.535	166.463	180.635	190.115	162.113	124.052	195.812	165.381	10.9706	38.0032	65	176.099	151.861	228.84	209.24	125.709
66	223.993	233.592	222.759	191.213	298.128	312.342	320.292	278.354	161.407	234.679	166.222	240.271	16.8286	55.8142	66	214.035	437.562	146.104	254.54	204.486	225.811	198.902	241.509	224.866	238.646	26.8998	80.6995	66	104.647	168.418	134.307	163.485	146.205	215.249	156.347	182.423	176.24	167.503	134.724	189.333	161.574	8.41875	29.1634	66	187.538	151.403	231.653	217.181	120.593
67	223.993	250.473	224.11	215.554	297.153	304.28	308.73	271.17	202.615	233.355	96.5195	238.905	18.1722	60.2702	67	262.098	475.179	147.757	255.453	226.663	239.329	201.824	220.944	206.525	248.419	30.511	91.5331	67	103.101	158.746	152.934	172.783	160.086	210.416	156.96	184.755	169.921	166.159	129.686	189.098	162.887	7.98592	27.664	67	170.981	146.197	240.094	217.97	115.112
68	223.993	252.031	242.85	199.28	285.624	308.076	301.73	274.553	243.823	244.772	172.559	249.935	12.5363	41.5782	68	248.167	471.409	148.584	259.423	219.431	236.73	211.676	230.538	199.722	247.298	30.0046	90.0138	68	102.671	180.757	142.64	158.526	150.589	230.427	153.894	188.136	190.085	160.404	134.199	193.939	165.522	9.63555	33.3785	68	181.818	147.357	224.15	201.96	112.188
69	208.152	242.682	227.624	208.795	295.042	296.139	302.175	263.915	273.257	245.207	197.905	250.99	11.4192	37.8732	69	239.808	467.512	148.308	247.757	219.431	227.608	195.083	231.519	203.377	242.267	29.8586	89.5757	69	101.124	177.422	147.052	160.696	140.452	213.179	152.055	188.191	183.616	166.929	134.059	188.968	162.812	8.71646	30.1947	69	168.573	151.105	226.964	209.382	111.823
70	229.392	259.043	231.892	223.269	294.88	297.153	302.866	264.818	143.746	236.207	204.242	244.319	14.1485	46.9252	70	242.594	472.82	144.726	266.084	222.806	223.559	184.346	241.224	215.593	245.973	30.7112	92.1335	70	102.413	165.083	131.366	165.035	161.182	214.557	160.639	185.198	181.625	162.069	124.202	180.959	161.194	8.69349	30.1151	70	183.624	146.548	241.97	204.516	115.112
71	213.431	260.242	236.088	217.371	296.179	301.012	290.575	268.258	208.425	248.182	172.559	246.575	12.437	41.2488	71	214.035	462.204	144.175	255.282	218.95	239.7	190.064	247.033	223.779	243.913	29.4808	88.4423	71	101.726	153.077	154.895	163.485	141.913	219.386	161.558	185.646	186.8	166.929	136.586	190.603	163.55	8.74547	30.2952	71	176.4	145.792	223.212	200.864	117.304
72	222.989	242.682	227.186	221.897	285.624	310.517	304.689	276.729	208.502	238.467	147.212	244.227	14.3919	47.7325	72	255.132	432.716	145.828	283.547	215.093	235.837	192.238	254.06	221.509	248.44	26.6016	79.8047	72	103.444	173.087	143.13	160.799	145.383	208.348	157.88	193.161	189.2	162.069	137.342	197.476	164.277	8.64522	29.9479	72	185.43	149.892	249.473	214.377	119.132
73	212.4	266.458	229.164	181.592	290.983	310.768	330.135	276.952	208.502	237.148	178.896	247.545	15.4319	51.1817	73	245.38	421.51	139.767	269.932	218.95	234.997	190.25	234.903	201.316	239.667	25.9225	77.7675	73	101.382	182.758	145.581	149.201	120.909	206.966	155.734	187.088	189.893	155.798	137.666	190.084	160.255	9.16131	31.7357	73	169.175	142.907	234.467	214.742	115.843
74	211.368	242.682	239.71	186.992	299.264	314.615	324.489	280.38	214.389	252.651	223.252	253.617	13.6656	45.3236	74	216.124	430.357	142.798	280.734	207.861	223.584	187.732	238.675	207.553	237.269	27.1147	81.3442	74	102.155	169.085	156.365	150.881	113.329	196.618	152.975	188.144	204.715	155.798	142.376	185.316	159.813	9.06773	31.4115	74	169.476	145.334	214.772	205.977	106.707
75	197.704	297.576	246.944	186.868	294.555	320.49	336.497	285.616	237.936	249.553	223.252	261.545	14.7995	49.0843	75	247.215	413.254	142.522	266.084	230.279	227.678	187.135	236.598	210.819	240.176	24.7642	74.2926	75	100.351	159.747	137.248	141.48	127.758	208.346	152.055	190.087	203.714	149.855	124.251	183.354	156.52	9.71406	33.6505	75	180.313	151.915	246.659	181.508	102.322
76	185.88	282.017	235.177	170.014	285.624	333.261	345.691	296.997	161.407	244.302	153.549	244.902	20.9369	69.4399	76	268.367	396.74	143.073	247.586	219.19	233.088	192.024	242.132	226.912	241.012	22.9049	68.7147	76	98.9759	184.759	172.541	142.1	126.754	225.594	150.216	182.045	194.662	145.997	136.745	196.164	163.046	10.2761	35.5975	76	180.313	151.808	222.275	186.986	109.265
77	195.695	252.031	241.745	180.566	302.999	321.094	340.074	286.154	202.615	246.211	172.559	249.249	17.4191	57.7726	77	225.622	342.482	143.073	270.702	212.2	242.979	170.688	239.734	219.572	229.673	19.0358	57.1073	77	99.3196	177.089	157.836	133.525	115.065	233.183	143.471	185.955	182.497	155.798	137.78	191.092	159.384	10.6533	36.9042	77	166.466	149.838	230.715	192.099	112.554
78	185.88	297.576	234.739	168.841	304.947	325.521	321.3	290.099	273.257	243.17	172.559	256.172	17.7801	58.9699	78	268.367	424.587	142.522	250.426	197.737	241.565	185.174	237.883	208.372	239.626	26.4275	79.2826	78	98.8041	174.754	134.798	130.942	133.055	211.108	141.019	185.596	187.616	149.855	144.502	203.956	158	9.84173	34.0927	78	170.379	153.022	192.263	195.021	111.457
79	177.384	291.998	239.912	154.918	296.504	317.828	315.855	283.244	285.031	241.459	191.569	254.155	17.2966	57.3664	79	240.946	399.766	141.971	273.038	200.629	237.815	192.998	236.137	205.868	236.574	23.8821	71.6463	79	94.2497	159.08	160.777	140.936	133.238	234.564	136.114	186.331	201.261	145.997	133.88	203.406	160.819	11.2428	38.9461	79	174.594	146.953	223.212	187.717	102.687
80	181.632	257.951	225.299	159.461	302.349	321.369	338.218	286.399	220.275	231.002	185.232	246.29	18.0338	59.8114	80	217.263	369.303	136.736	242.674	217.986	228.274	193.145	236.556	229.297	230.137	20.404	61.2121	80	99.3196	160.414	145.091	141.659	134.79	206.965	141.938	183.016	200.953	158.614	145.383	208.979	160.594	9.62385	33.338	80	158.94	146.25	210.082	186.986	108.899
81	193.686	266.464	231.85	175.73	302.187	335.535	333.606	299.024	273.257	243.802	153.549	255.335	18.6571	61.8787	81	245.38	407.099	143.624	256.583	203.522	231.454	177.131	248.477	218.598	236.874	24.5268	73.5805	81	101.382	179.423	146.071	145.096	142.918	197.306	141.325	183.374	188.717	146.004	141.56	204.838	159.834	8.78133	30.4194	81	178.206	155.449	205.393	186.256	113.65
82	185.88	268.908	234.528	177.342	298.452	317.144	339.233	282.634	173.18	244.485	185.232	246.093	18.0478	59.8577	82	220.746	443.767	142.798	253.505	215.574	243.642	174.393	228.291	209.775	236.943	28.2359	84.7078	82	99.1478	187.427	147.052	168.596	145.383	200.071	148.376	183.931	186.952	140.937	137.123	204.528	162.46	9.0232	31.2573	82	172.185	143.365	205.393	184.795	103.052
83	198.624	237.199	221.973	175.583	310.631	321.369	342.626	286.399	220.275	226.711	197.905	249.027	17.0375	56.5069	83	208.904	418.382	143.9	261.466	203.522	239.35	180.6	247.278	212.543	235.105	25.8021	77.4062	83	99.3196	164.416	163.718	160.641	142.552	235.946	147.15	186.428	187.921	148.6	148.836	204.761	165.857	10.0294	34.7427	83	169.476	147.06	208.207	186.986	105.245
84	181.632	250.41	231.47	149.788	226.179	325.313	346.59	289.914	220.275	234.55	286.618	249.34	17.7561	58.8904	84	220.746	381.714	139.491	243.738	215.574	229.734	186.177	234.105	206.233	228.612	21.787	65.3609	84	104.355	164.749	155.875	157.851	136.342	206.966	144.084	182.925	173.35	147.34	144.724	202.687	160.104	8.29333	28.7289	84	170.981	145.846	192.263	187.717	112.554
85	197.704	252.031	231.673	177.142	210.171	334.133	373.309	297.774	243.823	239.04	172.559	248.123	19.224	63.7588	85	252.346	359.149	145.828	245.543	212.682	230.068	171.149	245.52	203.437	229.525	20.1429	60.4288	85	103.324	163.415	130.876	153.512	135.703	226.288	147.763	183.404	199.504	151.603	134.258	195.134	160.399	10.0462	34.801	85	161.349	151.457	207.269	180.047	104.149
86	194.376	256.573	226.155	167.293	290.171	322.784	338.711	287.661	161.407	227.759	248.598	247.408	17.842	59.1751	86	212.387	353.508	142.246	257.856	224.252	232.704	174.9	239.106	212.415	227.708	19.53	58.59	86	107.191	181.424	127.445	159.711	134.059	260.093	141.632	183.64	165.197	140.045	149.22	200.878	162.545	11.6872	40.4858	86	169.476	151.861	169.754	182.604	116.208
87	197.241	258.726	230.64	163.418	210.171	322.878	331.245	287.744	296.805	237.876	229.589	251.485	16.0635	53.2766	87	248.609	399.202	143.9	255.31	205.209	238.551	191.573	238.034	203.219	235.956	23.4687	70.4061	87	104.012	164.749	157.345	161.57	135.612	213.179	136.114	186.133	178.812	141.057	138.059	208.54	160.432	9.28957	32.18	87	180.915	151.861	210.082	188.812	111.457
88	197.704	234.631	233.808	156.237	292.12	324.092	346.924	288.826	220.275	243.691	216.915	250.475	17.1108	56.7502	88	219.353	333.764	141.971	252.231	217.261	226.603	165.245	242.365	215.894	223.854	18.0672	54.2016	88	109.167	163.415	164.698	168.182	141.091	249.054	133.355	183.192	173.35	139.887	145.781	196.207	163.948	10.3461	35.8399	88	171.884	151.861	194.139	187.717	110.361
89	207.12	252.031	235.001	185.549	210.171	325.306	340.867	289.908	220.198	236.244	185.232	244.33	16.0247	53.1479	89	226.318	287.506	142.798	254.036	199.424	242.873	167.144	250.957	196.207	218.585	15.3489	46.0467	89	104.785	185.426	154.404	170.662	124.653	200.761	125.997	195.488	199.504	140.911	141.043	198.884	161.877	9.89361	34.2725	89	173.691	151.861	195.076	191.734	107.072
90	197.592	239.046	235.039	183.474	217.64	339.418	340.057	302.484	143.746	236.454	229.589	242.231	18.7446	62.1689	90	268.113	374.919	144.451	268.155	208.102	225.848	186.791	248.698	188.205	234.809	22.1988	66.5964	90	108.48	183.425	157.345	164.773	119.357	219.388	127.836	192.24	165.197	145.96	138.516	207.95	160.872	10.0985	34.9824	90	181.818	152.617	203.517	196.482	102.322
91	198.708	233.592	229.252	189.507	302.349	333.274	377.155	297.009	208.502	233.003	172.559	252.264	19.7702	65.5705	91	219.353	409.92	143.349	252.231	209.789	239.47	189.602	250.086	193.189	234.11	24.7835	74.3505	91	104.957	169.418	142.15	156.405	127.85	182.134	131.822	179.581	178.812	136.287	153.782	201.13	155.361	8.04308	27.862	91	177.303	149.38	203.517	199.768	108.899
92	196.248	250.473	232.392	195.662	300.563	327.486	304.708	291.851	179.067	238.631	210.579	247.969	15.4115	51.1143	92	175.214	419.51	141.695	243.738	215.574	230.378	180.668	261.269	199.328	229.708	26.7347	80.2042	92	102.98	188.428	165.188	160.744	126.754	228.357	131.209	184.149	161.148	150.759	141.302	191.406	161.035	9.80368	33.9609	92	165.262	146.953	196.952	201.96	102.322
93	192.682	252.031	233.79	182.911	294.393	344.569	307.318	307.075	285.031	243.643	216.915	260.032	15.5987	51.735	93	216.124	397.509	140.318	268.155	215.574	227.321	166.611	244.996	198.276	230.543	24.4985	73.4955	93	103.496	185.426	133.817	162.294	119.539	219.386	139.486	185.717	163.281	147.151	136.501	191.059	157.263	9.68395	33.5462	93	171.583	145.334	196.014	207.438	107.438
94	202.872	252.031	241.051	189.653	293.743	334.998	317.405	298.545	296.805	241.807	235.925	264.076	14.226	47.1822	94	271.154	395.817	140.318	261.466	210.995	223.272	186.177	257.837	203.02	238.895	23.9617	71.885	94	102.551	175.088	142.15	155.372	132.69	208.348	140.099	182.768	178.31	143.01	128.528	203.104	157.668	9.2413	32.0128	94	176.099	149.785	202.579	204.881	101.591
95	215.616	259.043	233.845	197.128	292.444	331.959	309.827	295.838	208.502	227.82	235.925	255.268	13.6936	45.4165	95	216.124	330.379	141.144	257.646	193.638	235.353	171.149	241.852	199.878	220.796	18.268	54.8039	95	102.465	164.749	149.503	161.88	131.594	206.966	141.325	178.575	174.212	143.491	132.388	197.627	157.065	8.5734	29.6991	95	180.915	147.357	197.89	205.612	105.61
96	194.376	260.242	231.301	185.256	292.769	333.173	329.168	296.919	226.162	230.67	229.589	255.421	15.3717	50.982	96	248.609	397.509	142.522	258.388	223.047	236.541	174.9	249.176	188.54	235.47	24.0971	72.2914	96	103.754	174.754	156.855	151.653	128.854	196.618	140.712	172.74	175.248	146.976	139.201	189.466	156.403	7.71353	26.7205	96	162.854	153.022	183.822	204.881	105.61
97	201.722	268.417	225.537	185.725	283.676	339.512	320.094	302.568	279.144	235.699	210.579	259.334	15.3363	50.8648	97	252.346	373.816	142.522	243.738	215.574	236.021	191.573	252.808	199.924	234.258	21.0839	63.2516	97	103.238	181.424	127.935	153.409	129.585	208.346	141.938	191.311	180.066	141.276	146.051	191.189	157.981	9.20853	31.8993	97	166.466	151.457	166.003	205.612	96.1092
98	196.131	242.682	224.846	189.243	297.803	324.186	342.017	288.91	155.52	235.397	178.896	243.239	18.7671	62.2433	98	257.919	373.252	143.349	248.621	200.629	234.573	165.245	256.649	215.056	232.81	22.0778	66.2335	98	103.399	181.758	145.091	151.033	133.055	225.594	142.858	182.162	173.862	140.77	135.77	190.572	158.827	9.47904	32.8363	98	187.538	149.785	158.5	203.055	113.65
99	195.695	270.861	214.432	176.58	300.076	325.018	320.292	289.651	202.615	221.786	191.569	246.234	16.7841	55.6667	99	262.098	380.586	139.216	248.621	215.574	227.593	167.144	262.517	203.853	234.134	22.9876	68.9628	99	106.366	177.422	117.151	150	124.653	233.183	140.405	193.238	178.872	141.232	132.905	194.224	157.471	10.9223	37.8358	99	178.507	149.38	187.573	194.656	105.976
100	185.88	242.682	225.935	196.102	294.068	331.966	308.73	295.844	237.936	234.409	210.579	251.285	14.7046	48.7697	100	248.167	360.841	141.971	258.388	200.629	225.366	186.791	259.024	219.949	233.458	20.2729	60.8188	100	105.809	170.752	84.3097	148.243	123.74	211.108	140.087	195.003	185.821	144.466	145.525	191.764	153.886	11.0597	38.312	100	171.884	153.022	166.94	198.673	103.418
101	202.872	282.017	222.905	188.187	302.999	354.67	301.73	316.077	249.71	237.714	216.915	261.436	16.0722	53.3056	101	239.808	382.278	141.42	256.317	207.861	230.242	189.602	242.237	217.469	234.137	21.7622	65.2866	101	104.697	164.416	97.5444	141.528	130.863	234.564	138.91	188.791	209.846	138.513	135.947	186.096	155.976	12.0019	41.5757	101	188.441	149.678	172.568	209.264	97.9364
102	181.632	242.682	225.466	185.549	293.906	326.741	302.175	291.187	249.71	240.603	210.579	250.021	14.5732	48.3338	102	242.594	384.535	143.9	255.575	208.342	228.2	180.668	259.292	212.504	235.068	22.3439	67.0316	102	103.028	165.75	118.132	154.545	132.598	206.965	156.862	192.018	186.9	141.33	129.284	188.328	156.312	9.41792	32.6246	102	163.456	153.075	166.94	211.455	111.092
103	197.083	242.682	217.574	181.446	297.316	348.721	302.866	310.775	237.936	233.279	235.925	255.055	15.7884	52.3641	103	256.526	386.227	138.94	260.459	208.342	241.639	166.611	243.829	214.719	235.255	23.3122	69.9366	103	101.73	154.411	129.896	168.747	130.772	197.306	163.631	184.895	188.375	139.114	137.8	185.283	156.83	8.50187	29.4513	103	181.818	144.472	153.81	202.69	98.3018
104	178.537	291.998	223.778	189.946	292.931	343.147	290.575	305.808	202.538	236.666	280.282	257.837	16.2696	53.9602	104	255.132	383.406	139.767	258.388	200.629	230.514	195.083	249.199	207.457	235.508	22.2981	66.8944	104	102.472	172.753	120.582	176.289	122.005	200.071	168.928	184.107	180.204	136.54	137.055	184.492	157.125	9.12333	31.6041	104	175.196	149.136	150.997	207.438	95.7438
105	193.344	257.951	225.821	198.007	294.068	341.658	304.689	304.481	273.257	239.01	261.272	263.051	14.0707	46.6674	105	245.38	377.765	143.073	251.434	222.806	237.184	184.346	254.496	222.286	237.641	21.216	63.6479	105	102.842	184.092	125.974	172.466	121.457	235.946	166.574	181.083	190.637	140.09	139.244	173.525	161.161	10.601	36.7229	105	172.486	143.014	140.68	206.707	90.9931
106	192.629	242.682	229.093	193.464	304.298	339.512	330.135	302.568	196.728	252.14	216.915	254.56	16.742	55.5269	106	254.436	376.637	140.593	268.155	215.574	230.501	190.064	241.481	216.449	237.099	21.478	64.4341	106	104.419	187.761	120.092	169.573	124.014	206.966	158.628	182.893	191.807	140.767	143.763	179.626	159.192	9.37176	32.4647	106	167.67	153.533	136.929	210.725	93.5512
107	197.592	268.908	216.502	180.566	286.599	324.186	324.489	288.91	226.162	229.048	229.589	252.05	14.8723	49.3259	107	247.215	428.536	145.828	258.388	215.574	233.199	192.238	256.289	216.367	243.737	25.9344	77.8031	107	105.995	178.756	136.268	176.289	132.05	226.288	152.742	183.16	187.671	135.609	156.34	167.77	161.578	9.23827	32.0023	107	171.884	145.388	157.562	221.681	100.494
108	195.695	242.682	225.993	189.507	295.205	325.018	336.497	289.651	208.502	232.335	280.282	256.488	15.5071	51.4311	108	237.463	398.074	140.593	228.346	193.638	235.476	190.25	257.045	208.644	232.17	23.6814	71.0441	108	99.7828	176.422	112.74	165.854	130.772	260.093	149.21	184.42	181.024	135.713	155.53	169.873	160.119	11.9653	41.4491	108	167.068	143.471	135.053	221.681	89.8968
109	178.368	242.682	225.256	158.289	288.547	331.966	345.691	295.844	221.484	234.831	216.915	249.079	18.0402	59.8325	109	225.622	399.202	141.695	245.067	201.351	247.753	195.083	254.135	200.733	234.516	23.6537	70.9611	109	102.472	175.421	148.032	161.102	122.188	213.179	146.561	181.382	179.16	142.659	152.077	163.956	157.349	8.37081	28.9973	109	173.39	146.25	154.748	215.838	105.245
110	193.686	280.648	232.227	162.832	298.29	354.67	340.074	316.077	190.841	240.851	159.886	251.826	21.2045	70.3273	110	219.353	407.099	142.798	235.3	186.406	247.673	184.346	267.918	212.424	233.702	25.0084	75.0252	110	102.008	180.09	114.21	167.301	127.393	249.054	149.799	174.376	182.433	135.411	143.934	172.322	158.194	11.2479	38.9638	110	171.583	149.54	156.624	216.203	96.4746
111	188.664	256.573	224.045	169.574	295.692	326.741	321.3	291.187	220.275	228.443	197.905	247.309	16.4281	54.4857	111	240.946	425.715	140.869	255.575	200.87	230.452	190.064	258.303	209.11	239.1	26.3414	79.0242	111	100.988	174.754	124.504	161.722	125.201	200.761	149.504	184.214	191.807	135.672	158.983	170.664	156.565	8.751	30.3143	111	180.313	161.838	164.127	216.203	92.8203
112	194.225	258.726	226.715	185.256	286.923	348.721	315.855	310.775	220.275	231.879	235.925	255.934	15.9782	52.9936	112	217.263	415.561	140.318	268.155	215.574	234.338	192.238	268.038	207.152	239.849	25.5067	76.5202	112	108.48	176.755	132.837	165.544	131.685	219.388	145.973	189.788	187.671	132.743	142.683	174.078	158.969	9.17439	31.781	112	182.42	142.716	160.375	221.316	97.9364
113	192.423	234.631	230.195	179.247	290.821	343.147	338.218	305.808	243.746	236.1	191.569	253.264	17.508	58.0676	113	296.672	422.895	138.665	242.996	201.111	243.248	190.25	268.612	208.636	245.898	26.9844	80.9532	113	104.957	178.756	134.798	159.966	113.33	182.134	143.913	188.77	181.024	138.994	148.709	179.347	154.558	8.16542	28.2859	113	175.798	146.304	152.872	225.698	84.0499
114	188.921	248.395	227.801	182.325	295.205	341.658	333.606	304.481	220.275	233.343	254.935	257.359	16.4589	54.588	114	266.719	420.074	145.277	228.346	201.111	231.3	192.238	270.782	206.56	240.268	25.8691	77.6074	114	102.98	173.42	133.817	158.829	121.914	228.357	141.558	186.411	179.16	138.874	157.534	172.723	157.965	9.61802	33.3178	114	185.129	145.495	150.997	219.125	93.5512
115	191.47	242.682	222.864	184.377	278.155	348.721	339.233	310.775	220.275	223.868	216.915	252.667	17.3989	57.7056	115	208.904	380.586	145.277	268.155	208.102	236.85	190.25	258.605	203.43	233.351	22.1374	66.4121	115	103.496	170.085	144.111	159.036	118.991	225.594	139.204	185.563	182.433	136.862	140.693	169.374	156.287	9.51543	32.9624	115	180.915	153.342	142.556	226.794	90.6277
116	185.65	233.592	219.898	184.377	286.112	343.147	342.626	305.808	226.162	230.493	248.598	255.133	17.0449	56.5314	116	220.746	422.895	146.104	242.996	208.583	234.684	187.732	243.503	191.225	233.163	25.9178	77.7533	116	102.551	168.751	121.563	157.899	119.631	233.183	136.555	176.697	170.024	128.864	144.786	165.863	152.197	10.0294	34.743	116	175.196	161.838	130.364	218.394	97.9364
117	183.641	250.473	226.538	193.903	281.565	341.658	346.59	304.481	208.502	235.4	223.252	254.182	17.1238	56.7932	117	263.933	422.895	144.451	249.95	193.879	239.832	187.135	268.011	215.584	242.852	26.2153	78.646	117	102.465	170.752	130.876	152.114	119.722	211.108	138.321	181.378	170.024	137.41	140.793	166.085	151.754	8.57162	29.693	117	191.15	148.891	152.872	231.542	90.2623
118	184.892	252.031	227.244	189.8	278.642	329.954	373.309	294.05	261.484	239.567	197.905	257.171	17.8714	59.2728	118	212.387	410.484	146.379	235.3	178.934	234.561	192.024	264.072	208.755	231.433	25.1578	75.4733	118	103.754	159.747	110.289	155.626	116.343	234.564	139.204	179.199	170.557	130.142	150.741	173.904	152.006	10.4577	36.2265	118	181.216	152.128	150.059	226.063	87.7042
119	191.16	242.682	223.498	183.351	285.462	333.71	338.711	297.398	220.275	238.963	210.579	251.435	16.3979	54.3857	119	248.609	390.74	141.971	236.042	208.342	227.63	170.688	240.351	198.138	229.168	23.297	69.8909	119	103.238	154.411	116.171	152.424	113.603	206.965	138.027	181.92	170.485	139.529	127.505	170.274	147.879	8.9106	30.8672	119	173.089	144.845	143.494	228.62	92.4549
120	181.632	259.043	217.021	183.058	295.205	342.926	331.245	305.61	220.275	234.704	210.579	252.845	17.3936	57.6882	120	219.353	449.973	141.42	248.621	200.629	224.087	185.174	267.406	210.785	238.605	29.0362	87.1087	120	103.399	148.074	117.641	160.999	117.804	197.306	140.712	179.714	174.991	139.529	146.023	178.9	150.424	8.33488	28.8729	120	177.905	141.609	139.742	224.968	90.6277
[truncated: 8 more columns]
